# Supplementary material for: Effects of In Vivo Gluten Challenge on PBMC Gene Expression Profiles in Diet Treated Celiac Disease
Source: Front Immunol. 2020 Dec 11;11:594243. doi: 10.3389/fimmu.2020.594243 (PMC7759501; doi:10.3389/fimmu.2020.594243)
Supplement: Supplementary file 3 [file Table_2.xls]

## Sheet: PW Zscore and pvalues
Pathway Induction/inhibition prediction z-scores							Pathway enrichment BH corrected pvalues in -log10 (cut off 1.3 corresponding to 0.05)
Canonical Pathways	challenged CD vs unchallenged CD	challenged CD vs challenged HC	unchallenged CD vs challenged HC	#Count			Canonical Pathways	challenged CD vs unchallenged CD	challenged CD vs challenged HC	unchallenged CD vs challenged HC		#Count
IL-8 Signaling	3.606	2.236		45	14	0	Agranulocyte Adhesion and Diapedesis	8.82807	6.5159	0.749423		99	45	3
Role of IL-17F in Allergic Inflammatory Airway Diseases	2.828	2.646		4	1	0	Granulocyte Adhesion and Diapedesis	9.09236	6.08068	0.496322
IL-6 Signaling	3	2.236					NRF2-mediated Oxidative Stress Response	4.86226	4.22925	1.05442
HMGB1 Signaling	3.162	2					Role of IL-17F in Allergic Inflammatory Airway Diseases	4.28823	5.69635	0
Salvage Pathways of Pyrimidine Ribonucleotides	2.449	2.236					Neuroinflammation Signaling Pathway	6.09348	3.38896	0.365814
Neuroinflammation Signaling Pathway	2.132	2.53					Communication between Innate and Adaptive Immune Cells	4.87811	4.74847	0
LXR/RXR Activation	-2.646	-2					Differential Regulation of Cytokine Production in Intestinal Epithelial Cells by IL-17A and IL-17F	4.07441	4.71852	0
TREM1 Signaling	1.897	2.646					TREM1 Signaling	4.28823	4.44304	0
Production of Nitric Oxide and Reactive Oxygen Species in Macrophages	2.324	2					Differential Regulation of Cytokine Production in Macrophages and T Helper Cells by IL-17A and IL-17F	3.58	5.09645	0
Toll-like Receptor Signaling	1.667	2.449					Phagosome Formation	7.02318	1.01509	0.536344
Leukocyte Extravasation Signaling	2.887	1					Role of Hypercytokinemia/hyperchemokinemia in the Pathogenesis of Influenza	2.76991	5.7151	0
Acute Phase Response Signaling	1.667	2					Toll-like Receptor Signaling	4.28823	3.42204	0.609736
Osteoarthritis Pathway	1.265	2					NF-κB Signaling	4.17176	3.69696	0
p38 MAPK Signaling	1.134	2					Role of IL-17A in Arthritis	3.86573	3.55872	0
Chemokine Signaling	1.134	2					Dendritic Cell Maturation	4.05117	2.83088	0.488482
NRF2-mediated Oxidative Stress Response	1.732	1.342					IL-17A Signaling in Fibroblasts	3.1988	3.90128	0
Signaling by Rho Family GTPases	3						Role of Pattern Recognition Receptors in Recognition of Bacteria and Viruses	5.17823	1.30931	0
Sirtuin Signaling Pathway	1	2					Pathogenesis of Multiple Sclerosis	1.29995	4.81396	0
PI3K Signaling in B Lymphocytes	2.828						Altered T Cell and B Cell Signaling in Rheumatoid Arthritis	3.89254	1.48408	0.567224
Gαq Signaling	2.828						Role of IL-17A in Psoriasis	2.95205	2.74878	0
Glioma Invasiveness Signaling	2.828						Interferon Signaling	4.05117	1.59289	0
LPS-stimulated MAPK Signaling	2.646						SPINK1 General Cancer Pathway	4.68858	0.935434	0
Insulin Receptor Signaling	2.646						IL-10 Signaling	2.37139	2.541	0.609736
Interferon Signaling	2.646						Role of NFAT in Regulation of the Immune Response	3.95874	1.06637	0.488482
HGF Signaling	2.646						Production of Nitric Oxide and Reactive Oxygen Species in Macrophages	4.27493	0.710998	0.479117
Phospholipase C Signaling	1.604	1					Xenobiotic Metabolism Signaling	3.60199	1.36285	0.373447
Integrin Signaling	2.53						IL-8 Signaling	3.09427	1.44318	0.749423
Role of Pattern Recognition Receptors in Recognition of Bacteria and Viruses	2.53						Fcγ Receptor-mediated Phagocytosis in Macrophages and Monocytes	2.89296	0.832207	1.485
Opioid Signaling Pathway	2.53						Role of Macrophages, Fibroblasts and Endothelial Cells in Rheumatoid Arthritis	3.61437	1.579	0
B Cell Receptor Signaling	2.53						Atherosclerosis Signaling	3.37499	1.59289	0
NF-κB Activation by Viruses	2.53						LPS/IL-1 Mediated Inhibition of RXR Function	1.66226	2.45383	0.749423
GM-CSF Signaling	2.449						Hepatic Cholestasis	2.95205	1.07545	0.496322
VEGF Family Ligand-Receptor Interactions	2.449						Cholecystokinin/Gastrin-mediated Signaling	2.89296	0.726414	0.886039
PPAR Signaling	-2.449						NF-κB Activation by Viruses	3.60199	0.834365	0
Renin-Angiotensin Signaling	2.449						Aryl Hydrocarbon Receptor Signaling	2.34141	1.47696	0.536344
ErbB Signaling	2.449						Hepatic Fibrosis / Hepatic Stellate Cell Activation	2.12638	1.59289	0.495838
14-3-3-mediated Signaling	2.449						IL-6 Signaling	2.01334	1.52037	0.536344
mTOR Signaling	2.449						Graft-versus-Host Disease Signaling	1.83172	2.20392	0
CXCR4 Signaling	2.333						Leukocyte Extravasation Signaling	2.13776	0.698697	1.05442
Tec Kinase Signaling	2.333						Phospholipase C Signaling	2.37139	0.592146	0.739767
Thrombopoietin Signaling	2.236						Ethanol Degradation II	1.37283	1.48408	0.749423
RhoGDI Signaling	-2.236						B Cell Receptor Signaling	2.38793	0.726414	0.488482
IL-3 Signaling	2.236						Glutathione Redox Reactions I	1.14192	1.70374	0.749423
IL-1 Signaling	2.236						Chemokine Signaling	2.06548	1.52037	0
iNOS Signaling	2.236						HMGB1 Signaling	2.27069	0.807382	0.496322
Neuregulin Signaling	2.236						LXR/RXR Activation	1.78306	1.08087	0.536344
ErbB4 Signaling	2.236						Activation of IRF by Cytosolic Pattern Recognition Receptors	2.71099	0.686446	0
Rac Signaling	2.236						Apelin Adipocyte Signaling Pathway	1.21154	1.5784	0.594877
Glioma Signaling	2.236						iNOS Signaling	1.8569	0.765148	0.732323
Prolactin Signaling	2.236						Glucocorticoid Receptor Signaling	1.50929	1.48408	0.335783
Actin Nucleation by ARP-WASP Complex	2.236						Glioma Invasiveness Signaling	2.49331	0.239861	0.567224
Macropinocytosis Signaling	2.236						IL-17 Signaling	1.8469	1.42843	0
Fc Epsilon RI Signaling	2.121						Osteoarthritis Pathway	1.79837	0.977956	0.475154
Apelin Endothelial Signaling Pathway	2.121						p38 MAPK Signaling	1.49828	1.18347	0.536344
UVC-Induced MAPK Signaling	2						Ethanol Degradation IV	1.59366	1.59289	0
Type I Diabetes Mellitus Signaling	2						Integrin Signaling	1.65453	0.455083	1.05442
Ephrin Receptor Signaling	2						Glutathione-mediated Detoxification	0.913304	1.48408	0.749423
Retinoate Biosynthesis I	-2						Retinoate Biosynthesis I	1.5441	0.851894	0.749423
Cholecystokinin/Gastrin-mediated Signaling	1.897						Death Receptor Signaling	1.09023	1.47843	0.567224
Superpathway of Inositol Phosphate Compounds	1.897						Natural Killer Cell Signaling	2.54891	0	0.536344
3-phosphoinositide Biosynthesis	1.897						Role of Tissue Factor in Cancer	2.04842	1.02059	0
PPARα/RXRα Activation	-1.89						Macropinocytosis Signaling	1.88856	0.567386	0.567224
EIF2 Signaling	1.89						D-glucuronate Degradation I	1.17873	0.677241	1.05442
CCR3 Signaling in Eosinophils	1.89						Salvage Pathways of Pyrimidine Ribonucleotides	1.15695	1.71568	0
NF-κB Signaling	0.775	1					Adenosine Nucleotides Degradation II	1.8569	1.01509	0
Dendritic Cell Maturation	0.258	1.414					Apelin Endothelial Signaling Pathway	1.60788	0.686446	0.536344
Fcγ Receptor-mediated Phagocytosis in Macrophages and Monocytes	1.667						Superoxide Radicals Degradation	1.23727	1.59289	0
ILK Signaling	1.633						Type I Diabetes Mellitus Signaling	1.57076	1.25253	0
cAMP-mediated signaling	1.414						The Visual Cycle	1.12656	0.939075	0.749423
fMLP Signaling in Neutrophils	1.414						TNFR2 Signaling	1.81631	0.977956	0
Role of NFAT in Regulation of the Immune Response	-1.387	0					Systemic Lupus Erythematosus Signaling	1.8569	0.867198	0
Protein Kinase A Signaling	-1.155						NAD biosynthesis II (from tryptophan)	1.09681	1.60532	0
Type II Diabetes Mellitus Signaling	1.134						Actin Nucleation by ARP-WASP Complex	1.32972	0.284935	1.05442
Angiopoietin Signaling	-1						Acute Phase Response Signaling	1.8569	0.807382	0
Regulation of Actin-based Motility by Rho	1						PKCθ Signaling in T Lymphocytes	1.56967	0.574424	0.504104
CCR5 Signaling in Macrophages	1						Tryptophan Degradation III (Eukaryotic)	1.25805	1.38633	0
Ethanol Degradation IV	-1						NAD Biosynthesis III	1.12694	1.50223	0
Purine Nucleotides Degradation II (Aerobic)	1						LPS-stimulated MAPK Signaling	1.81631	0.22752	0.54745
PEDF Signaling	1						Inhibition of Angiogenesis by TSP1	2.13776	0.433527	0
iCOS-iCOSL Signaling in T Helper Cells	-1						IL-17A Signaling in Airway Cells	1.60781	0.962385	0
Gα12/13 Signaling	1						CD28 Signaling in T Helper Cells	1.60781	0.42444	0.536344
Adenosine Nucleotides Degradation II	1						Sirtuin Signaling Pathway	1.00318	0.882979	0.681212
Ethanol Degradation II	-1						MSP-RON Signaling Pathway	0.909919	1.02059	0.609736
RhoA Signaling	1						Tec Kinase Signaling	1.46709	0.313054	0.749423
SPINK1 General Cancer Pathway	-0.905						Remodeling of Epithelial Adherens Junctions	0.374562	0.654506	1.48504
Th1 Pathway	-0.816						EIF2 Signaling	1.31219	0.454259	0.747404
Synaptic Long Term Potentiation	0.816						Purine Nucleotides Degradation II (Aerobic)	1.56967	0.867198	0
Actin Cytoskeleton Signaling	0.707						Role of Osteoblasts, Osteoclasts and Chondrocytes in Rheumatoid Arthritis	1.01955	0.654506	0.747404
ERK/MAPK Signaling	0.632						Virus Entry via Endocytic Pathways	1.06384	0.454259	0.886039
Death Receptor Signaling	0.447	0					IL-17A Signaling in Gastric Cells	1.32179	1.06748	0
Aryl Hydrocarbon Receptor Signaling	0.447						Gαq Signaling	1.8569	0	0.501248
Apelin Adipocyte Signaling Pathway	-0.447	0					Role of RIG1-like Receptors in Antiviral Innate Immunity	1.94388	0.408951	0
CD40 Signaling	-0.447						Fc Epsilon RI Signaling	1.64011	0.1741	0.536344
Activation of IRF by Cytosolic Pattern Recognition Receptors	0.378						Apoptosis Signaling	1.79956	0.543509	0
Apoptosis Signaling	0.378						Signaling by Rho Family GTPases	1.12393	0.205678	1.00643
PKCθ Signaling in T Lymphocytes	0.333						fMLP Signaling in Neutrophils	1.60781	0.172456	0.536344
Systemic Lupus Erythematosus Signaling							NAD Phosphorylation and Dephosphorylation	0.889253	0.567415	0.839026
OX40 Signaling Pathway							NAD Salvage Pathway II	1.0855	0.455083	0.749423
TWEAK Signaling							Actin Cytoskeleton Signaling	0.798166	0	1.485
Hepatic Cholestasis							Th1 Pathway	1.25805	1.02059	0
TNFR1 Signaling							MIF-mediated Glucocorticoid Regulation	1.06543	0.454259	0.749423
Bladder Cancer Signaling							ILK Signaling	1.00155	0.514834	0.749423
Fatty Acid β-oxidation I	0						Tryptophan Degradation to 2-amino-3-carboxymuconate Semialdehyde	0.935849	1.29304	0
Adenine and Adenosine Salvage III							Type II Diabetes Mellitus Signaling	1.88856	0.329627	0
IL-17A Signaling in Fibroblasts							3-phosphoinositide Biosynthesis	1.45901	0	0.749423
IL-17A Signaling in Gastric Cells							PEDF Signaling	1.36685	0.834365	0
Tryptophan Degradation to 2-amino-3-carboxymuconate Semialdehyde							Fatty Acid β-oxidation I	1.36685	0.790662	0
Natural Killer Cell Signaling							Calcium-induced T Lymphocyte Apoptosis	1.8569	0.288143	0
Iron homeostasis signaling pathway							PPAR Signaling	1.28592	0.814027	0
Reelin Signaling in Neurons							Protein Kinase A Signaling	1.88856	0.205678	0
Choline Degradation I							Airway Pathology in Chronic Obstructive Pulmonary Disease	1.36685	0.726414	0
Stearate Biosynthesis I (Animals)	0						Retinoate Biosynthesis II	1.36685	0.726414	0
FAT10 Signaling Pathway							Erythropoietin Signaling	1.8569	0.23432	0
RAR Activation							Role of Cytokines in Mediating Communication between Immune Cells	0.776996	1.31293	0
Tight Junction Signaling							Crosstalk between Dendritic Cells and Natural Killer Cells	0.508925	0.567415	1.00643
Pyruvate Fermentation to Lactate							Germ Cell-Sertoli Cell Junction Signaling	0.473942	0.550409	1.05442
Inflammasome pathway							MIF Regulation of Innate Immunity	0.906267	0.403086	0.740921
Sertoli Cell-Sertoli Cell Junction Signaling							Oxidative Ethanol Degradation III	1.11152	0.927644	0
Glycine Biosynthesis II							FAT10 Signaling Pathway	1.46464	0.567386	0
Role of Macrophages, Fibroblasts and Endothelial Cells in Rheumatoid Arthritis							Mitochondrial Dysfunction	0.4865	0.777285	0.749423
Role of Hypercytokinemia/hyperchemokinemia in the Pathogenesis of Influenza							TNFR1 Signaling	1.25805	0.740041	0
Sucrose Degradation V (Mammalian)							ERK/MAPK Signaling	1.51564	0	0.478745
Agranulocyte Adhesion and Diapedesis							Inflammasome pathway	0.83996	1.14935	0
Pyrimidine Deoxyribonucleotides De Novo Biosynthesis I							OX40 Signaling Pathway	1.09599	0.890993	0
Phagosome Formation							PI3K Signaling in B Lymphocytes	1.569	0.412552	0
Autoimmune Thyroid Disease Signaling							Guanosine Nucleotides Degradation III	1.42212	0.556014	0
Agrin Interactions at Neuromuscular Junction							Urate Biosynthesis/Inosine 5'-phosphate Degradation	1.42212	0.556014	0
Erythropoietin Signaling							TWEAK Signaling	1.0855	0.890993	0
Th1 and Th2 Activation Pathway							Prostate Cancer Signaling	0.896176	0.506325	0.537658
VDR/RXR Activation							Pyruvate Fermentation to Lactate	1.23727	0.698697	0
Hypoxia Signaling in the Cardiovascular System							VDR/RXR Activation	0.862601	0	1.05442
Crosstalk between Dendritic Cells and Natural Killer Cells							Th1 and Th2 Activation Pathway	1.12094	0.777285	0
HIPPO signaling							CXCR4 Signaling	1.37541	0	0.496322
Oxidative Phosphorylation							14-3-3-mediated Signaling	0.910647	0.410136	0.536344
NAD Phosphorylation and Dephosphorylation							RhoGDI Signaling	0.494119	0.305836	1.05442
Mitochondrial Dysfunction							mTOR Signaling	1.10365	0	0.749423
Sorbitol Degradation I							Fatty Acid α-oxidation	1.32179	0.530878	0
Glucocorticoid Receptor Signaling							Superpathway of Inositol Phosphate Compounds	1.10365	0	0.743215
Fatty Acid Activation							RAR Activation	1.06556	0.284935	0.491472
IL-10 Signaling							CCR5 Signaling in Macrophages	1.00525	0.834365	0
MIF Regulation of Innate Immunity							Gα12/13 Signaling	0.889253	0.403086	0.535021
Epithelial Adherens Junction Signaling							GM-CSF Signaling	1.56967	0.250644	0
Granulocyte Adhesion and Diapedesis							Glycolysis I	0.234524	0.821804	0.749423
Autophagy							Role of PKR in Interferon Induction and Antiviral Response	0.968123	0.832207	0
T Helper Cell Differentiation							iCOS-iCOSL Signaling in T Helper Cells	1.34411	0.449667	0
CD28 Signaling in T Helper Cells	0						CD40 Signaling	1.19396	0.592392	0
April Mediated Signaling							Iron homeostasis signaling pathway	1.12393	0.653536	0
Inhibition of Matrix Metalloproteases							Th2 Pathway	1.12393	0.653536	0
Glutathione-mediated Detoxification							Opioid Signaling Pathway	1.12656	0.205678	0.432718
Altered T Cell and B Cell Signaling in Rheumatoid Arthritis							L-carnitine Biosynthesis	1.10089	0.654506	0
Virus Entry via Endocytic Pathways							Rac Signaling	1.02733	0.177874	0.536344
Remodeling of Epithelial Adherens Junctions							Clathrin-mediated Endocytosis Signaling	0.729404	0.260692	0.749423
Fatty Acid α-oxidation							Gluconeogenesis I	0.211509	0.776751	0.749423
HER-2 Signaling in Breast Cancer							TCA Cycle II (Eukaryotic)	0.567737	0.418902	0.749423
Role of IL-17A in Arthritis							Glioma Signaling	1.00525	0.174531	0.536344
NAD biosynthesis II (from tryptophan)							Autophagy	1.03274	0.677241	0
Differential Regulation of Cytokine Production in Macrophages and T Helper Cells by IL-17A and IL-17F							Regulation of Actin-based Motility by Rho	0.714113	0	0.989057
TCA Cycle II (Eukaryotic)							Epithelial Adherens Junction Signaling	0.238105	0.380313	1.08218
Germ Cell-Sertoli Cell Junction Signaling							Acute Myeloid Leukemia Signaling	0.926217	0.210043	0.543799
Acute Myeloid Leukemia Signaling							Angiopoietin Signaling	1.09023	0.567415	0
Hepatic Fibrosis / Hepatic Stellate Cell Activation							PPARα/RXRα Activation	1.36685	0.288143	0
Oncostatin M Signaling							Agrin Interactions at Neuromuscular Junction	0.321393	0.26486	1.05442
Guanosine Nucleotides Degradation III							IL-1 Signaling	1.06384	0.564892	0
Graft-versus-Host Disease Signaling							RhoA Signaling	0.546068	0.185754	0.886039
Glutathione Redox Reactions I							Sertoli Cell-Sertoli Cell Junction Signaling	0.288481	0.54334	0.749423
IL-17A Signaling in Airway Cells	0						Hypoxia Signaling in the Cardiovascular System	1.29995	0.280027	0
IL-17 Signaling							Bladder Cancer Signaling	1.02419	0.550409	0
Ketolysis							HGF Signaling	1.3689	0.182806	0
L-carnitine Biosynthesis							Sorbitol Degradation I	0.729254	0.821804	0
Atherosclerosis Signaling							Autoimmune Thyroid Disease Signaling	0.8081	0.736997	0
Role of Osteoblasts, Osteoclasts and Chondrocytes in Rheumatoid Arthritis							CCR3 Signaling in Eosinophils	1.5441	0	0
Tryptophan Degradation III (Eukaryotic)							B Cell Development	1.06543	0.454259	0
D-glucuronate Degradation I							Adenine and Adenosine Salvage III	0.935849	0.574456	0
Superoxide Radicals Degradation							Unfolded protein response	1.14028	0.347809	0
Role of RIG1-like Receptors in Antiviral Innate Immunity							Fatty Acid Activation	0.912926	0.574424	0
Oxidative Ethanol Degradation III							Ketolysis	0.912926	0.574424	0
TNFR2 Signaling							Ketogenesis	0.912926	0.574424	0
Differential Regulation of Cytokine Production in Intestinal Epithelial Cells by IL-17A and IL-17F							Sucrose Degradation V (Mammalian)	0	0.574424	0.910125
Glycolysis I							Glycine Biosynthesis II	0.68317	0.777285	0
Ketogenesis							Stearate Biosynthesis I (Animals)	1.12157	0.338797	0
MSP-RON Signaling Pathway							RANK Signaling in Osteoclasts	0.935849	0.524383	0
Antigen Presentation Pathway							April Mediated Signaling	1.00525	0.433527	0
Regulation of IL-2 Expression in Activated and Anergic T Lymphocytes							Antigen Presentation Pathway	0.590441	0.837119	0
Role of Tissue Factor in Cancer							Nur77 Signaling in T Lymphocytes	1.09681	0.330269	0
Inhibition of Angiogenesis by TSP1	0						Pyrimidine Deoxyribonucleotides De Novo Biosynthesis I	0.579775	0.832207	0
Role of Cytokines in Mediating Communication between Immune Cells							Breast Cancer Regulation by Stathmin1	0.907771	0	0.473362
MIF-mediated Glucocorticoid Regulation							Choline Degradation I	0.636244	0.740041	0
Calcium-induced T Lymphocyte Apoptosis	0						UDP-D-xylose and UDP-D-glucuronate Biosynthesis	0.636244	0.740041	0
Gluconeogenesis I							HIPPO signaling	1.12656	0.248468	0
Airway Pathology in Chronic Obstructive Pulmonary Disease							Oxidative Phosphorylation	0	0.463013	0.910125
NAD Salvage Pathway II							Tight Junction Signaling	0	0.592146	0.749423
Unfolded protein response							Regulation of IL-2 Expression in Activated and Anergic T Lymphocytes	1.09023	0.239861	0
Clathrin-mediated Endocytosis Signaling							Reelin Signaling in Neurons	1.06384	0.23432	0
Breast Cancer Regulation by Stathmin1							VEGF Family Ligand-Receptor Interactions	1.271	0	0
Xenobiotic Metabolism Signaling							HER-2 Signaling in Breast Cancer	1.00525	0.225919	0
Nur77 Signaling in T Lymphocytes							Thrombopoietin Signaling	1.22533	0	0
The Visual Cycle							ErbB Signaling	1.22533	0	0
Retinoate Biosynthesis II							UVC-Induced MAPK Signaling	1.22216	0	0
Prostate Cancer Signaling							T Helper Cell Differentiation	0.913304	0.280027	0
Role of IL-17A in Psoriasis							G-Protein Coupled Receptor Signaling	1.14449	0	0
Communication between Innate and Adaptive Immune Cells							ErbB4 Signaling	1.13402	0	0
B Cell Development							Insulin Receptor Signaling	1.09681	0	0
G-Protein Coupled Receptor Signaling							Renin-Angiotensin Signaling	0.920102	0.170962	0
RANK Signaling in Osteoclasts							cAMP-mediated signaling	1.09023	0	0
LPS/IL-1 Mediated Inhibition of RXR Function							Ephrin Receptor Signaling	0.321393	0	0.749423
NAD Biosynthesis III							IL-3 Signaling	1.06556	0	0
Role of PKR in Interferon Induction and Antiviral Response							Prolactin Signaling	1.02419	0	0
Urate Biosynthesis/Inosine 5'-phosphate Degradation							Inhibition of Matrix Metalloproteases	0.9894	0	0
Th2 Pathway							Neuregulin Signaling	0.984102	0	0
UDP-D-xylose and UDP-D-glucuronate Biosynthesis							Synaptic Long Term Potentiation	0.968123	0	0
Pathogenesis of Multiple Sclerosis							Oncostatin M Signaling	0.928146	0	0

## Sheet: Significant Zscores and pvals
Pathway Induction/inhibition prediction z-scores					Pathway enrichment BH corrected pvalues in -log10 (cut off 1.3 corresponding to 0.05)
Canonical Pathways	challenged CD vs unchallenged CD	challenged CD vs challenged HC	unchallenged CD vs challenged HC		Canonical Pathways	challenged CD vs unchallenged CD	challenged CD vs challenged HC	unchallenged CD vs challenged HC
IL-8 Signaling	3.606	2.236			Granulocyte Adhesion and Diapedesis	9.09236	6.08068	0.496322
HMGB1 Signaling	3.162	2			Agranulocyte Adhesion and Diapedesis	8.82807	6.5159	0.749423
IL-6 Signaling	3	2.236			Phagosome Formation	7.02318	1.01509	0.536344
Signaling by Rho Family GTPases	3				Neuroinflammation Signaling Pathway	6.09348	3.38896	0.365814
Leukocyte Extravasation Signaling	2.887	1			Role of Pattern Recognition Receptors in Recognition of Bacteria and Viruses	5.17823	1.30931	0
Role of IL-17F in Allergic Inflammatory Airway Diseases	2.828	2.646			Communication between Innate and Adaptive Immune Cells	4.87811	4.74847	0
PI3K Signaling in B Lymphocytes	2.828				NRF2-mediated Oxidative Stress Response	4.86226	4.22925	1.05442
Gαq Signaling	2.828				SPINK1 General Cancer Pathway	4.68858	0.935434	0
Glioma Invasiveness Signaling	2.828				Role of IL-17F in Allergic Inflammatory Airway Diseases	4.28823	5.69635	0
LPS-stimulated MAPK Signaling	2.646				TREM1 Signaling	4.28823	4.44304	0
Insulin Receptor Signaling	2.646				Toll-like Receptor Signaling	4.28823	3.42204	0.609736
Interferon Signaling	2.646				Production of Nitric Oxide and Reactive Oxygen Species in Macrophages	4.27493	0.710998	0.479117
HGF Signaling	2.646				NF-κB Signaling	4.17176	3.69696	0
Integrin Signaling	2.53				Differential Regulation of Cytokine Production in Intestinal Epithelial Cells by IL-17A and IL-17F	4.07441	4.71852	0
Role of Pattern Recognition Receptors in Recognition of Bacteria and Viruses	2.53				Dendritic Cell Maturation	4.05117	2.83088	0.488482
Opioid Signaling Pathway	2.53				Interferon Signaling	4.05117	1.59289	0
B Cell Receptor Signaling	2.53				Role of NFAT in Regulation of the Immune Response	3.95874	1.06637	0.488482
NF-κB Activation by Viruses	2.53				Altered T Cell and B Cell Signaling in Rheumatoid Arthritis	3.89254	1.48408	0.567224
Salvage Pathways of Pyrimidine Ribonucleotides	2.449	2.236			Role of IL-17A in Arthritis	3.86573	3.55872	0
GM-CSF Signaling	2.449				Role of Macrophages, Fibroblasts and Endothelial Cells in Rheumatoid Arthritis	3.61437	1.579	0
VEGF Family Ligand-Receptor Interactions	2.449				Xenobiotic Metabolism Signaling	3.60199	1.36285	0.373447
Renin-Angiotensin Signaling	2.449				NF-κB Activation by Viruses	3.60199	0.834365	0
ErbB Signaling	2.449				Differential Regulation of Cytokine Production in Macrophages and T Helper Cells by IL-17A and IL-17F	3.58	5.09645	0
14-3-3-mediated Signaling	2.449				Atherosclerosis Signaling	3.37499	1.59289	0
mTOR Signaling	2.449				IL-17A Signaling in Fibroblasts	3.1988	3.90128	0
CXCR4 Signaling	2.333				IL-8 Signaling	3.09427	1.44318	0.749423
Tec Kinase Signaling	2.333				Role of IL-17A in Psoriasis	2.95205	2.74878	0
Production of Nitric Oxide and Reactive Oxygen Species in Macrophages	2.324	2			Hepatic Cholestasis	2.95205	1.07545	0.496322
Thrombopoietin Signaling	2.236				Fcγ Receptor-mediated Phagocytosis in Macrophages and Monocytes	2.89296	0.832207	1.485
IL-3 Signaling	2.236				Cholecystokinin/Gastrin-mediated Signaling	2.89296	0.726414	0.886039
IL-1 Signaling	2.236				Role of Hypercytokinemia/hyperchemokinemia in the Pathogenesis of Influenza	2.76991	5.7151	0
iNOS Signaling	2.236				Activation of IRF by Cytosolic Pattern Recognition Receptors	2.71099	0.686446	0
Neuregulin Signaling	2.236				Natural Killer Cell Signaling	2.54891	0	0.536344
ErbB4 Signaling	2.236				Glioma Invasiveness Signaling	2.49331	0.239861	0.567224
Rac Signaling	2.236				B Cell Receptor Signaling	2.38793	0.726414	0.488482
Glioma Signaling	2.236				IL-10 Signaling	2.37139	2.541	0.609736
Prolactin Signaling	2.236				Phospholipase C Signaling	2.37139	0.592146	0.739767
Actin Nucleation by ARP-WASP Complex	2.236				Aryl Hydrocarbon Receptor Signaling	2.34141	1.47696	0.536344
Macropinocytosis Signaling	2.236				HMGB1 Signaling	2.27069	0.807382	0.496322
Neuroinflammation Signaling Pathway	2.132	2.53			Leukocyte Extravasation Signaling	2.13776	0.698697	1.05442
Fc Epsilon RI Signaling	2.121				Inhibition of Angiogenesis by TSP1	2.13776	0.433527	0
Apelin Endothelial Signaling Pathway	2.121				Hepatic Fibrosis / Hepatic Stellate Cell Activation	2.12638	1.59289	0.495838
UVC-Induced MAPK Signaling	2				Chemokine Signaling	2.06548	1.52037	0
Type I Diabetes Mellitus Signaling	2				Role of Tissue Factor in Cancer	2.04842	1.02059	0
Ephrin Receptor Signaling	2				IL-6 Signaling	2.01334	1.52037	0.536344
TREM1 Signaling	1.897	2.646			Role of RIG1-like Receptors in Antiviral Innate Immunity	1.94388	0.408951	0
Cholecystokinin/Gastrin-mediated Signaling	1.897				Macropinocytosis Signaling	1.88856	0.567386	0.567224
Superpathway of Inositol Phosphate Compounds	1.897				Type II Diabetes Mellitus Signaling	1.88856	0.329627	0
3-phosphoinositide Biosynthesis	1.897				Protein Kinase A Signaling	1.88856	0.205678	0
EIF2 Signaling	1.89				iNOS Signaling	1.8569	0.765148	0.732323
CCR3 Signaling in Eosinophils	1.89				Adenosine Nucleotides Degradation II	1.8569	1.01509	0
NRF2-mediated Oxidative Stress Response	1.732	1.342			Systemic Lupus Erythematosus Signaling	1.8569	0.867198	0
Toll-like Receptor Signaling	1.667	2.449			Acute Phase Response Signaling	1.8569	0.807382	0
Acute Phase Response Signaling	1.667	2			Gαq Signaling	1.8569	0	0.501248
Fcγ Receptor-mediated Phagocytosis in Macrophages and Monocytes	1.667				Calcium-induced T Lymphocyte Apoptosis	1.8569	0.288143	0
ILK Signaling	1.633				Erythropoietin Signaling	1.8569	0.23432	0
Phospholipase C Signaling	1.604	1			IL-17 Signaling	1.8469	1.42843	0
cAMP-mediated signaling	1.414				Graft-versus-Host Disease Signaling	1.83172	2.20392	0
fMLP Signaling in Neutrophils	1.414				TNFR2 Signaling	1.81631	0.977956	0
Osteoarthritis Pathway	1.265	2			LPS-stimulated MAPK Signaling	1.81631	0.22752	0.54745
p38 MAPK Signaling	1.134	2			Apoptosis Signaling	1.79956	0.543509	0
Chemokine Signaling	1.134	2			Osteoarthritis Pathway	1.79837	0.977956	0.475154
Type II Diabetes Mellitus Signaling	1.134				LXR/RXR Activation	1.78306	1.08087	0.536344
Sirtuin Signaling Pathway	1	2			LPS/IL-1 Mediated Inhibition of RXR Function	1.66226	2.45383	0.749423
Regulation of Actin-based Motility by Rho	1				Integrin Signaling	1.65453	0.455083	1.05442
CCR5 Signaling in Macrophages	1				Fc Epsilon RI Signaling	1.64011	0.1741	0.536344
Purine Nucleotides Degradation II (Aerobic)	1				Apelin Endothelial Signaling Pathway	1.60788	0.686446	0.536344
PEDF Signaling	1				IL-17A Signaling in Airway Cells	1.60781	0.962385	0
Gα12/13 Signaling	1				CD28 Signaling in T Helper Cells	1.60781	0.42444	0.536344
Adenosine Nucleotides Degradation II	1				fMLP Signaling in Neutrophils	1.60781	0.172456	0.536344
RhoA Signaling	1				Ethanol Degradation IV	1.59366	1.59289	0
Synaptic Long Term Potentiation	0.816				Type I Diabetes Mellitus Signaling	1.57076	1.25253	0
NF-κB Signaling	0.775	1			PKCθ Signaling in T Lymphocytes	1.56967	0.574424	0.504104
Actin Cytoskeleton Signaling	0.707				Purine Nucleotides Degradation II (Aerobic)	1.56967	0.867198	0
ERK/MAPK Signaling	0.632				GM-CSF Signaling	1.56967	0.250644	0
Death Receptor Signaling	0.447	0			PI3K Signaling in B Lymphocytes	1.569	0.412552	0
Aryl Hydrocarbon Receptor Signaling	0.447				Retinoate Biosynthesis I	1.5441	0.851894	0.749423
Activation of IRF by Cytosolic Pattern Recognition Receptors	0.378				CCR3 Signaling in Eosinophils	1.5441	0	0
Apoptosis Signaling	0.378				ERK/MAPK Signaling	1.51564	0	0.478745
PKCθ Signaling in T Lymphocytes	0.333				Glucocorticoid Receptor Signaling	1.50929	1.48408	0.335783
Dendritic Cell Maturation	0.258	1.414			p38 MAPK Signaling	1.49828	1.18347	0.536344
Apelin Adipocyte Signaling Pathway	-0.447	0			Tec Kinase Signaling	1.46709	0.313054	0.749423
CD40 Signaling	-0.447				FAT10 Signaling Pathway	1.46464	0.567386	0
Th1 Pathway	-0.816				3-phosphoinositide Biosynthesis	1.45901	0	0.749423
SPINK1 General Cancer Pathway	-0.905				Guanosine Nucleotides Degradation III	1.42212	0.556014	0
Angiopoietin Signaling	-1				Urate Biosynthesis/Inosine 5'-phosphate Degradation	1.42212	0.556014	0
Ethanol Degradation IV	-1				CXCR4 Signaling	1.37541	0	0.496322
iCOS-iCOSL Signaling in T Helper Cells	-1				Ethanol Degradation II	1.37283	1.48408	0.749423
Ethanol Degradation II	-1				HGF Signaling	1.3689	0.182806	0
Protein Kinase A Signaling	-1.155				PEDF Signaling	1.36685	0.834365	0
Role of NFAT in Regulation of the Immune Response	-1.387	0			Fatty Acid β-oxidation I	1.36685	0.790662	0
PPARα/RXRα Activation	-1.89				Airway Pathology in Chronic Obstructive Pulmonary Disease	1.36685	0.726414	0
Retinoate Biosynthesis I	-2				Retinoate Biosynthesis II	1.36685	0.726414	0
RhoGDI Signaling	-2.236				PPARα/RXRα Activation	1.36685	0.288143	0
PPAR Signaling	-2.449				iCOS-iCOSL Signaling in T Helper Cells	1.34411	0.449667	0
LXR/RXR Activation	-2.646	-2			Actin Nucleation by ARP-WASP Complex	1.32972	0.284935	1.05442
					IL-17A Signaling in Gastric Cells	1.32179	1.06748	0
					Fatty Acid α-oxidation	1.32179	0.530878	0
					EIF2 Signaling	1.31219	0.454259	0.747404
					Pathogenesis of Multiple Sclerosis	1.29995	4.81396	0
					Hypoxia Signaling in the Cardiovascular System	1.29995	0.280027	0
					PPAR Signaling	1.28592	0.814027	0
					VEGF Family Ligand-Receptor Interactions	1.271	0	0
					Tryptophan Degradation III (Eukaryotic)	1.25805	1.38633	0
					Th1 Pathway	1.25805	1.02059	0
					TNFR1 Signaling	1.25805	0.740041	0
					Superoxide Radicals Degradation	1.23727	1.59289	0
					Pyruvate Fermentation to Lactate	1.23727	0.698697	0
					Thrombopoietin Signaling	1.22533	0	0
					ErbB Signaling	1.22533	0	0
					UVC-Induced MAPK Signaling	1.22216	0	0
					Apelin Adipocyte Signaling Pathway	1.21154	1.5784	0.594877
					CD40 Signaling	1.19396	0.592392	0
					D-glucuronate Degradation I	1.17873	0.677241	1.05442
					Salvage Pathways of Pyrimidine Ribonucleotides	1.15695	1.71568	0
					G-Protein Coupled Receptor Signaling	1.14449	0	0
					Glutathione Redox Reactions I	1.14192	1.70374	0.749423
					Unfolded protein response	1.14028	0.347809	0
					ErbB4 Signaling	1.13402	0	0
					NAD Biosynthesis III	1.12694	1.50223	0
					NAD biosynthesis II (from tryptophan)	1.09681	1.60532	0
					Death Receptor Signaling	1.09023	1.47843	0.567224
					Glutathione-mediated Detoxification	0.913304	1.48408	0.749423
					Actin Cytoskeleton Signaling	0.798166	0	1.485
					Role of Cytokines in Mediating Communication between Immune Cells	0.776996	1.31293	0
					Remodeling of Epithelial Adherens Junctions	0.374562	0.654506	1.48504

## Sheet: Upstream Regulator Zscore
	z-scores				logpvals				pvals
Upstream Regulators	challenged CD vs unchallenged CD	challenged CD vs challenged HC	unchallenged CD vs challenged HC		challenged CD vs unchallenged CD	challenged CD vs challenged HC	unchallenged CD vs challenged HC		challenged CD vs unchallenged CD	challenged CD vs challenged HC	unchallenged CD vs challenged HC
NFE2L2	0.998	2.473	1.978		7.11205	8.55513	2.15398		7.72589e-08	2.78527e-09	0.0070149
SMARCA4	1.868	3.028	1.964		12.5545	8.31393	2.29999		2.78952e-13	4.8537e-09	0.00501198
TP53	0.939	0.618	1.961		13.8988	9.99554	1.32046		1.26254e-14	1.01032e-10	0.0478119
JUN	1.676	2.47	1.931		18.0097	12.5025	2.88369		9.7785e-19	3.14444e-13	0.0013071
MYCN	-0.166	0	1.387		1.37708	4.40968	3.84449		0.0419685	3.89336e-05	0.000143058
CSF2	2.761	3.283	0.956		16.6805	11.7791	1.9676		2.08691e-17	1.66316e-12	0.0107745
FOS	0.843	0.864	0.914		11.1128	7.70685	2.53478		7.71326e-12	1.96405e-08	0.00291893
12 lipoxygenase	0	0	0		1.42961	0	0		0.0371867	1	1
15-LOX	0	0	0		1.42961	0	0		0.0371867	1	1
26s Proteasome	-1.177	-0.95	0		3.7877	3.06454	0		0.000163043	0.000861898	1
7S NGF	0	0	0		2.47041	0	0		0.00338524	1	1
A2M	0	0	0		0	2.33384	0		1	0.00463614	1
ABCA1	0	0	0		1.68023	2.1213	0		0.020882	0.00756315	1
ABCA4	0	0	0		2.22891	2.05101	0		0.00590317	0.00889179	1
ABCB1	0	0	0		1.31248	2.09474	0		0.0486988	0.00804015	1
ABCB4	0	0	0		1.33132	1.4205	0		0.0466321	0.0379752	1
ABCC8	0	0	0		0	2.00958	0		1	0.0097819	1
ABCD1	0	0	0		0	2.49393	0		1	0.00320681	1
ABCG1	0	0	0		0	3.44951	0		1	0.000355217	1
ACBD3	0	0	0		1.42961	1.8457	0		0.0371867	0.014266	1
ACKR1	0	0	0		3.16455	1.97021	0		0.000684621	0.0107099	1
ACKR2	-3.357	-2.828	0		17.853	10.6452	0		1.40294e-18	2.26356e-11	1
ACOT8	0	0	0		1.72656	2.14518	0		0.0187691	0.00715845	1
ACOX1	0.577	-0.707	0		5.40139	4.97463	1.56229		3.96837e-06	1.06015e-05	0.0273972
Acp5	0	0	0		1.42961	1.8457	0		0.0371867	0.014266	1
ACTA2	0	0	0		2.03948	0	0		0.00913103	1	1
ACTB	0	0	0		1.31248	0	1.47524		0.0486988	1	0.0334778
Actin	0	0	0		1.55982	2.35851	0		0.0275536	0.00438016	1
ACTN4	1.982	0	0		3.51725	3.56613	0		0.000303914	0.00027156	1
ACVR2A	0	0	0		1.68861	0	0		0.0204827	1	1
ACVRL1	0	0	0		2.26312	1.51919	0		0.00545608	0.0302556	1
ADA	0.728	0	0		3.39337	0	1.31023		0.000404231	1	0.048952
ADAM19	0	0	0		1.72656	0	0		0.0187691	1	1
ADAMTS13	0	0	0		0	1.45239	0		1	0.0352865	1
ADAMTS9	0	0	0		1.42961	0	0		0.0371867	1	1
Adaptor protein 1	0	0	0		3.01392	2.57107	0		0.00096845	0.00268493	1
ADCY	-1.131	0	0		2.69806	1.73948	0		0.0020042	0.0182189	1
ADCYAP1	-0.597	0.24	0		2.00464	3.25209	0		0.00989368	0.000559638	1
ADGRF5	0	0	0		1.8442	2.65617	0		0.0143152	0.00220712	1
ADIPOQ	0.386	0.059	0		10.4403	5.16739	0		3.628e-11	6.80151e-06	1
ADIPOR1	-1	0	0		2.94597	1.86279	0		0.00113247	0.0137155	1
ADM	-1.131	0	0		1.51416	0	0		0.0306085	1	1
ADORA2B	-0.478	0	0		4.92247	2.4725	0		1.19544e-05	0.00336902	1
ADORA3	1.89	2.449	0		6.42289	7.60028	1.43253		3.77672e-07	2.51025e-08	0.0369375
ADRA1A	0	0	0		1.81596	0	0		0.0152771	1	1
ADRA1B	0	0	0		1.65492	0	0		0.0221351	1	1
ADRA1D	0	0	0		1.81596	0	0		0.0152771	1	1
ADRB	-1.229	-0.853	0		6.60862	5.73921	0		2.46251e-07	1.82299e-06	1
ADRB2	0	0	0		1.63017	0	0		0.0234332	1	1
ADRB3	0	0	0		2.00364	1.89697	0		0.00991655	0.0126773	1
ADRM1	0	0	0		1.42961	1.8457	0		0.0371867	0.014266	1
AFAP1-AS1	0	0	0		0	0	1.67217		1	1	0.0212729
AFAP1L2	0	0	0		1.42961	1.8457	0		0.0371867	0.014266	1
AFP	0	0	0		1.68861	0	0		0.0204827	1	1
AGER	1.152	1.531	0		5.60314	6.96365	0		2.4938e-06	1.08729e-07	1
AGPAT2	0	0	0		0	1.86279	0		1	0.0137155	1
AGT	-0.572	1.571	0		8.43359	6.34255	0		3.68477e-09	4.54408e-07	1
AGTR1	0	0	0		0	1.35037	0		1	0.0446302	1
AHCY	0	0	0		0	1.67115	0		1	0.0213229	1
AHR	1.953	1.614	0		3.20323	2.29641	0		0.000626285	0.00505344	1
Ahr-Arnt	0	0	0		2.03948	0	0		0.00913103	1	1
Ahr-aryl hydrocarbon-Arnt	0	0	0		2.6885	0	0		0.00204882	1	1
AHSG	0	0	0		0	1.30934	0		1	0.049052	1
AIMP1	2.415	2.415	0		6.73731	9.23474	0		1.83101e-07	5.82446e-10	1
AIP	0	0	0		2.65739	0	0		0.00220095	1	1
AKIRIN2	0	0	0		2.15902	0	0		0.00693397	1	1
AKR1B1	0	0	0		0	1.73948	0		1	0.0182189	1
Akt	0.524	0.546	0		8.70452	7.54578	0		1.97461e-09	2.8459e-08	1
AKT1	-0.084	2.18	0		7.8505	4.94849	0		1.41091e-08	1.12592e-05	1
AKT2	0.749	0	0		2.30438	0	0		0.00496153	1	1
ALB	1.969	1.969	0		1.78751	3.28034	0		0.0163114	0.000524392	1
ALDH1A2	0.447	0	0		3.52043	0	0		0.000301694	1	1
ALDH2	-2	0	0		2.87985	1.83005	0		0.00131871	0.0147893	1
Aldose Reductase	0.849	0	0		3.08801	3.24102	0		0.000816558	0.00057409	1
ALOX15	-1.165	0	0		3.05963	1.47807	0		0.000871706	0.0332603	1
ALOX5	-0.2	0	0		2.78083	0	0		0.00165641	1	1
Alpha catenin	-2.563	-2.425	0		4.04393	3.64044	0		9.0379e-05	0.000228854	1
ALPL	0	0	0		0	0	2.27083		1	1	0.00536008
AMELY	0	0	0		0	0	1.90437		1	1	0.0124633
AMFR	0	0	0		0	1.45239	0		1	0.0352865	1
AMH	0	0	0		0	1.71154	0		1	0.0194296	1
AMOT	0	0	0		0	1.67115	0		1	0.0213229	1
AMOTL1	0	0	0		0	1.67115	0		1	0.0213229	1
AMOTL2	0	0	0		0	1.67115	0		1	0.0213229	1
AMPK	-2.6	-1.953	0		2.49434	2.60795	0		0.00320378	0.00246634	1
Angiotensin II receptor type 1	1	0	0		3.42104	3.49379	0		0.000379279	0.000320785	1
ANGPT1	0	0	0		1.93712	2.33384	0		0.0115578	0.00463614	1
ANGPT2	1.503	1.534	0		7.12308	6.5314	0		7.53213e-08	2.94172e-07	1
ANKH	0	0	0		0	0	2.14627		1	1	0.00714054
ANKRD42	0	0	0		0	1.30934	0		1	0.049052	1
ANXA1	0	0	0		1.38314	1.45836	0		0.0413868	0.0348047	1
Ap1	2.126	2.37	0		10.5601	5.60272	1.47327		2.75348e-11	2.49618e-06	0.0336302
Ap2	0	0	0		1.52766	1.56278	0		0.0296713	0.0273662	1
AP2M1	0	0	0		2.29974	0	0		0.00501491	1	1
APAF1	0	0	0		0	1.37475	0		1	0.0421938	1
APC	-0.277	0	0		1.8726	0	2.76191		0.0134091	1	0.00173017
APCS	0	0	0		3.46498	0	0		0.000342786	1	1
APEX1	0	0	0		1.31248	0	0		0.0486988	1	1
APLNR	0	0	0		1.50301	0	0		0.0314041	1	1
APOA1	-0.887	-0.996	0		3.00853	3.01699	0		0.000980547	0.000961635	1
APOE	0.842	-1.71	0		7.57542	4.91	0		2.65814e-08	1.23026e-05	1
APOH	0	0	0		1.68861	0	0		0.0204827	1	1
APP	4.087	3.602	0		14.1892	16.8191	3.0138		6.46887e-15	1.51683e-17	0.000968723
AQP1	0	0	0		1.35548	0	0		0.0441082	1	1
AQUAPORIN	0	0	0		1.72656	2.14518	0		0.0187691	0.00715845	1
AR	0	2.219	0		0	1.98463	0		1	0.0103603	1
AREG	0.618	-0.2	0		6.00631	3.32244	0		9.85575e-07	0.000475952	1
ARF6	0	0	0		2.89505	0	0		0.00127335	1	1
ARHGAP21	0	1	0		1.33132	3.59981	0		0.0466321	0.000251297	1
ARHGDIG	-1	0	0		3.51725	2.14101	0		0.000303914	0.00722759	1
ARIH2	0	0	0		1.42961	1.8457	0		0.0371867	0.014266	1
ARNT	0	0.152	0		0	2.59352	0		1	0.00254965	1
ARNT2	0	0	0		1.37434	0	0		0.0422342	1	1
ARRB1	0	0	0		1.73719	1.71154	0		0.0183151	0.0194296	1
ARRB2	0	0	0		1.59251	1.60913	0		0.0255557	0.0245961	1
Asc2	0	0	0		0	1.45239	2.04974		1	0.0352865	0.0089179
ASCC1	0	0	0		0	1.54776	0		1	0.0283296	1
ASGR1	0	0	0		1.72656	0	0		0.0187691	1	1
ASH1L	0	0	0		2.98243	1.67115	0		0.00104129	0.0213229	1
ATF1	0	0	0		1.33132	2.44335	0		0.0466321	0.00360285	1
ATF2	0.115	0	0		5.0064	1.53383	0		9.85366e-06	0.029253	1
ATF3	-0.343	0	0		4.80362	4.12468	0		1.57173e-05	7.50453e-05	1
ATF4	2.547	2.607	0		4.23302	3.76813	0		5.8477e-05	0.000170558	1
ATG16L1	-2.236	-2	0		6.56941	6.50841	0		2.69518e-07	3.10165e-07	1
Atg5	0	0	0		1.69894	1.68459	0		0.0200013	0.0206732	1
ATG5	0	0	0		0	1.45239	0		1	0.0352865	1
ATG7	-0.426	-1	0		3.25133	3.66391	0		0.000560619	0.000216815	1
ATM	1.133	0	0		1.82646	1.74706	0		0.0149122	0.0179034	1
ATN1	0	0	0		1.38767	0	0		0.0409571	1	1
ATP6V0A2	0	0	0		2.29974	1.37475	0		0.00501491	0.0421938	1
ATP6V1B1	0	0	0		1.42961	0	0		0.0371867	1	1
ATP7A	0	0	0		1.76243	0	0		0.0172812	1	1
ATPase	0	0	0		2.47041	1.45239	0		0.00338524	0.0352865	1
AURKB	0	0	0		0	2.05101	0		1	0.00889179	1
AXL	0	0	0		1.55953	1.58559	0		0.0275723	0.025966	1
AZU1	0	0	0		0	1.54776	0		1	0.0283296	1
B2M	0	0	0		1.73719	1.71154	0		0.0183151	0.0194296	1
B3GNT2	0	0	0		0	1.54776	2.14627		1	0.0283296	0.00714054
B4GALT6	0	0	0		3.01392	4.24433	0		0.00096845	5.69731e-05	1
BACH1	-1	0	0		3.42104	3.49379	1.47524		0.000379279	0.000320785	0.0334778
BAG2	0	0	0		0	1.54776	0		1	0.0283296	1
BAG4	0	0	0		0	1.54776	0		1	0.0283296	1
BARX2	0	0	0		1.35548	0	0		0.0441082	1	1
BAX	-1.387	0	0		2.36878	0	0		0.00427777	1	1
BCAP31	0	0	0		1.73719	1.71154	0		0.0183151	0.0194296	1
BCKDK	0	0	0		1.93573	2.75104	0		0.011595	0.00177403	1
BCL10	0	0	0		3.72998	3.72507	0		0.000186218	0.000188336	1
BCL11B	0	0	0		0	1.96235	0		1	0.0109057	1
BCL2	1.372	1.163	0		5.51776	5.57947	0		3.03558e-06	2.63347e-06	1
BCL2A1	0	0	0		2.29974	1.37475	0		0.00501491	0.0421938	1
BCL2L1	-0.118	1.384	0		4.35319	4.99405	0		4.43412e-05	1.0138e-05	1
BCL2L11	0	0	0		2.87985	1.83005	0		0.00131871	0.0147893	1
BCL3	-1.972	0	0		4.92247	3.6398	0		1.19544e-05	0.000229192	1
BCL6	-2.367	-1.832	0		12.4881	6.38647	0		3.25037e-13	4.10705e-07	1
BCOR	0	0	0		2.16798	0	0		0.00679228	1	1
BCR	0	0	0		1.35548	0	0		0.0441082	1	1
BCR (complex)	0.48	1.777	0		4.04732	5.01851	0		8.96772e-05	9.58277e-06	1
BDKRB2	0	0	0		0	1.83005	0		1	0.0147893	1
BECN1	0	0	0		1.69894	1.68459	0		0.0200013	0.0206732	1
BET	0	0	0		1.55982	0	0		0.0275536	1	1
BGN	0	0	0		1.86168	3.03223	0		0.0137504	0.000928474	1
BHLHA15	0	0	0		1.40132	0	0		0.03969	1	1
BID	-0.447	0	0		4.1424	3.18531	0		7.20451e-05	0.000652667	1
BIRC2	0	0	0		2.36208	3.56613	0		0.00434432	0.00027156	1
BIRC3	1.141	1.141	0		6.03093	8.51096	0		9.31264e-07	3.08347e-09	1
BMP	0	0	0		0	0	1.35832		1	1	0.0438209
BMP10	0.277	0	0		3.72998	2.24245	0		0.000186218	0.00572208	1
BMP15	0	0	0		2.05563	0	0		0.00879766	1	1
BMP2	-1.854	0	0		3.15107	0	0		0.000706211	1	1
BMP6	0.412	0	0		1.8819	1.4216	0		0.0131251	0.0378795	1
BMP7	-1.706	-1.241	0		3.17384	2.65203	0		0.000670135	0.00222829	1
BMPR2	0.883	0	0		5.04839	1.79865	1.34166		8.9456e-06	0.0158982	0.0455343
BMX	0	0	0		1.62142	0	0		0.0239101	1	1
BPI	0	0	0		2.47041	3.29915	0		0.00338524	0.000502165	1
BPIFA1	0	0	0		1.62142	0	0		0.0239101	1	1
BRAF	0	0	0		2.55298	2.23451	0		0.00279909	0.00582762	1
BRCA1	2.112	1.706	0		3.75162	2.69354	0		0.000177168	0.00202516	1
BRD4	1.276	0	0		3.19865	0	0		0.000632921	1	1
Brd4	-1	0	0		2.78083	0	0		0.00165641	1	1
BRD8	0	0	0		0	1.45239	0		1	0.0352865	1
BRMS1	0	0	0		1.76243	0	1.79598		0.0172812	1	0.0159964
BSCL2	0	0	0		6.09007	4.92191	0		8.12696e-07	1.19699e-05	1
BSG	2.785	2	0		5.41062	3.34576	0		3.88489e-06	0.000451069	1
BTBD7	0	0	0		1.42961	0	0		0.0371867	1	1
BTC	2.236	0	0		4.79761	2.14101	0		1.59365e-05	0.00722759	1
BTG2	-0.728	-1.091	0		2.94597	6.07743	0		0.00113247	8.36695e-07	1
BTK	-2.03	-1.238	0		7.26934	7.83566	0		5.37846e-08	1.45997e-08	1
BTNL2	0.239	0	0		3.28634	1.77733	0		0.000517199	0.016698	1
BTRC	0	0	0		2.11033	1.97021	0		0.00775665	0.0107099	1
BUD23	0	0	0		0	1.45239	0		1	0.0352865	1
C1orf61	0	0	0		0	1.30934	0		1	0.049052	1
C1q	0	0	0		2.51351	3.72507	0		0.00306545	0.000188336	1
C1QBP	0	0	0		1.35548	0	0		0.0441082	1	1
C1QTNF1	0	0	0		0	1.45239	0		1	0.0352865	1
C1QTNF12	0	0	0		0	1.54776	0		1	0.0283296	1
C3	2.043	2	0		3.28634	2.68342	0		0.000517199	0.0020729	1
C3AR1	-0.371	0.105	0		2.6975	3.41413	0		0.0020068	0.000385363	1
C5	2.228	2.609	0		11.0873	7.3406	0		8.17877e-12	4.56462e-08	1
C5	0	0	0		2.43523	3.64303	0		0.00367092	0.000227494	1
C5AR1	0.243	0	0		2.12649	0	0		0.00747327	1	1
C6	0	0	0		2.15902	2.98103	0		0.00693397	0.00104465	1
C7	0	1.715	0		3.29497	6.50841	0		0.000507023	3.10165e-07	1
C8	0	1.715	0		3.29497	6.50841	0		0.000507023	3.10165e-07	1
C9	0	1.715	0		3.29497	6.50841	0		0.000507023	3.10165e-07	1
C9orf3	0	0	0		0	1.45239	0		1	0.0352865	1
CACNA1A	0	0	0		1.68861	0	0		0.0204827	1	1
CACNA1C	0	0	0		0	1.30934	0		1	0.049052	1
CACTIN	0	0	0		0	1.54776	0		1	0.0283296	1
CALC	0	0	0		2.59764	0	0		0.00252559	1	1
CALCA	0.647	1.067	0		3.2248	2.23451	0		0.000595935	0.00582762	1
Calcineurin B	0	0	0		0	2.85814	0		1	0.00138631	1
Calcineurin protein(s)	-0.181	0.057	0		4.13275	2.70483	0		7.3663e-05	0.00197321	1
CaMKII	0	0	0		0	1.83005	0		1	0.0147893	1
CAMP	2.96	2.933	0		7.8674	9.50975	0		1.35705e-08	3.09207e-10	1
cAMP-Gef	0.927	0	0		5.09311	4.70675	0		8.07034e-06	1.96448e-05	1
CAPN3	0	0	0		2.59764	2.2984	0		0.00252559	0.00503036	1
CARD11	0	0	0		1.86168	3.03223	0		0.0137504	0.000928474	1
CARD8	0	0	0		2.98243	1.67115	0		0.00104129	0.0213229	1
CARD9	0	0	0		2.58873	4.16432	0		0.00257794	6.84977e-05	1
Carlr	0	0	0		2.68683	1.54776	0		0.00205668	0.0283296	1
CARM1	0	0	0		1.4382	1.49834	0		0.0364584	0.0317438	1
Casein	0	0	0		2.68683	3.51895	0		0.00205668	0.000302725	1
CASP1	0	0	0		0	1.38456	0		1	0.0412516	1
CASP3	0	0	0		1.69894	0	0		0.0200013	1	1
CASP4	0	0	0		2.15902	1.30934	0		0.00693397	0.049052	1
CASP8	0	-0.713	0		3.20742	4.29847	0		0.000620264	5.02953e-05	1
CASP8AP2	0	0	0		0	1.67115	0		1	0.0213229	1
CAT	0.84	0.478	0		8.73422	6.47537	0		1.84408e-09	3.34679e-07	1
CBFA2T3	0	0	0		1.40132	0	0		0.03969	1	1
CBFB	-0.447	0	0		3.14966	1.71769	0		0.000708501	0.0191561	1
CBL	0	0	0		1.73261	3.21766	0		0.0185091	0.000605817	1
Cbr2	0	0	0		1.72656	2.14518	0		0.0187691	0.00715845	1
CBR3-AS1	0	0	0		0	1.37475	0		1	0.0421938	1
CBX5	-0.816	0	0		1.63559	0	0		0.0231425	1	1
CBX7	-1.342	-2	0		4.67171	5.04468	0		2.12955e-05	9.02226e-06	1
CCL11	1.618	2.689	0		8.81863	7.84945	0		1.51833e-09	1.41433e-08	1
CCL15	0	0	0		2.29974	3.12511	0		0.00501491	0.000749703	1
Ccl2	1.568	1.974	0		6.97607	4.3597	0		1.05664e-07	4.36818e-05	1
CCL2	1.031	1.277	0		3.00853	3.01699	0		0.000980547	0.000961635	1
CCL21	0	0	0		2.6885	2.35851	0		0.00204882	0.00438016	1
CCL22	0	0	0		0	1.30934	0		1	0.049052	1
CCL3	1.98	1.131	0		3.80519	5.81785	0		0.000156606	1.52109e-06	1
CCL3L1	0	0	0		0	1.67115	0		1	0.0213229	1
CCL3L3	0	0	0		1.45035	2.24245	0		0.0354525	0.00572208	1
CCL4	0	0	0		0	3.24102	0		1	0.00057409	1
CCL5	3.715	3.325	0		18.7086	18.024	0		1.956e-19	9.46331e-19	1
Ccl6	0.152	0	0		4.84433	0	0		1.4311e-05	1	1
CCND3	0	0	0		0	2.05101	0		1	0.00889179	1
CCNQ	0	0	0		1.72656	0	0		0.0187691	1	1
CCNT1	0	0	0		1.76243	0	0		0.0172812	1	1
CCR1	0.765	0	0		4.76677	1.71154	1.32565		1.71092e-05	0.0194296	0.0472446
CCR2	-1.784	-0.275	0		7.65932	4.81209	0		2.1912e-08	1.54138e-05	1
CCR5	0	0	0		2.9144	4.86451	0		0.00121788	1.36613e-05	1
CCR6	0	0	0		1.35548	0	0		0.0441082	1	1
CD14	2.424	2.62	0		8.9047	9.30178	0		1.24537e-09	4.99135e-10	1
CD163	0	0	0		0	1.54776	0		1	0.0283296	1
CD180	0	0	0		1.62142	0	0		0.0239101	1	1
CD2	0.555	0	0		3.84476	2.44335	0		0.000142968	0.00360285	1
CD200	-1.214	0	0		4.23714	4.69558	0		5.79245e-05	2.01566e-05	1
CD209	-0.594	0	0		3.61994	2.19012	0		0.000239919	0.00645469	1
CD24	0	0	0		1.78885	1.37032	0		0.0162613	0.042627	1
CD244	0	0	0		3.29497	4.53295	0		0.000507023	2.93121e-05	1
CD247	1.067	0	0		1.51416	0	0		0.0306085	1	1
CD276	0	0	0		2.03948	0	0		0.00913103	1	1
CD28	2.759	2.079	0		5.28567	6.46539	0		5.17995e-06	3.42459e-07	1
CD3	3.543	3.495	0		10.4163	9.64347	0		3.83402e-11	2.27264e-10	1
CD3 group	1.964	0	0		1.75974	0	0		0.0173886	1	1
CD300C	0	0	0		0	1.54776	0		1	0.0283296	1
CD300LF	0	0	0		5.38764	2.98103	0		4.096e-06	0.00104465	1
CD38	0	1.463	0		3.52684	4.58946	1.47327		0.000297273	2.57358e-05	0.0336302
CD40	2.152	2.474	0		7.24767	8.03319	0		5.65362e-08	9.26415e-09	1
CD40LG	2.205	2.182	0		27.5339	18.9874	0		2.92467e-28	1.02934e-19	1
CD44	0.301	3.038	0		6.93365	5.49965	0		1.16507e-07	3.16479e-06	1
CD5	2.425	0	0		4.18935	2.16506	0		6.4662e-05	0.00683823	1
CD5L	0	0	0		1.40132	2.19012	0		0.03969	0.00645469	1
CD70	0	0	0		1.40132	0	0		0.03969	1	1
CD72	0	0	0		0	1.67115	0		1	0.0213229	1
CD80	0	0	0		0	1.54066	0		1	0.0287963	1
CD82	0	0	0		2.03948	0	0		0.00913103	1	1
CD86	0.408	0.447	0		5.47922	4.58267	0		3.31724e-06	2.61417e-05	1
CD8B	0	0	0		1.42961	1.8457	0		0.0371867	0.014266	1
CD93	0	0	0		1.42961	0	0		0.0371867	1	1
CDC20	0	0	0		0	1.54776	0		1	0.0283296	1
Cdc42	0	0	0		1.4382	0	0		0.0364584	1	1
CDH1	-0.581	0	0		2.35143	0	0		0.00445213	1	1
Cdk	1.287	0	0		4.5167	1.63345	0		3.04299e-05	0.023257	1
CDK10	0	0	0		1.42961	0	0		0.0371867	1	1
CDK19	0	0	0		2.68683	3.51895	0		0.00205668	0.000302725	1
CDK2	0	0	0		1.33132	0	0		0.0466321	1	1
CDK5R1	0	0	0		0	2.00958	1.47524		1	0.0097819	0.0334778
CDK7	0	0	0		1.62142	0	0		0.0239101	1	1
CDK8	0	0	0		2.16798	3.36082	0		0.00679228	0.000435689	1
CDK9	1.964	0	0		3.33745	2.18762	0		0.000459782	0.00649198	1
CDKL2	0	0	0		1.72656	2.14518	0		0.0187691	0.00715845	1
CDKN1A	0.465	-1.432	0		2.97697	2.27023	0		0.00105445	0.00536746	1
CDKN2A	1.185	1.694	0		2.38241	2.86743	0		0.00414563	0.00135696	1
CEACAM1	0	0	0		2.07172	1.4205	0		0.00847776	0.0379752	1
CEACAM21	0	0	0		0	1.67115	0		1	0.0213229	1
CEACAM5	0	0	0		0	1.54776	0		1	0.0283296	1
CEACAM6	0	0	0		0	1.67115	0		1	0.0213229	1
CEACAM7	0	0	0		0	1.67115	0		1	0.0213229	1
CEBPA	0.322	1.476	0		5.12554	5.92412	1.33267		7.4896e-06	1.1909e-06	0.0464867
CEBPB	1.408	2.554	0		12.4757	12.2832	1.41195		3.34442e-13	5.20901e-13	0.0387304
CEBPD	0	0	0		3.95068	4.07576	0		0.000112027	8.39927e-05	1
CERS3	0	0	0		1.42961	0	0		0.0371867	1	1
CERS5	0	0	0		1.68861	0	0		0.0204827	1	1
CFL1	0	0	0		0	1.54776	0		1	0.0283296	1
CFLAR	-1.981	-1.969	0		2.69806	4.28163	0		0.0020042	5.22845e-05	1
CFTR	-0.6	0	0		1.6009	1.5955	0		0.0250669	0.0253803	1
CG	0.906	1.777	0		9.12107	6.2252	0		7.56716e-10	5.95385e-07	1
CGAS	2.599	1.982	0		9.78813	7.13986	0		1.6288e-10	7.24672e-08	1
CHD3	0	0	0		0	1.37475	0		1	0.0421938	1
CHD5	0	0	0		0	1.67115	0		1	0.0213229	1
CHI3L1	0	0	0		1.90686	3.0811	0		0.0123921	0.000829651	1
CHIA	0	0	0		2.98243	3.81793	0		0.00104129	0.000152079	1
chitinase	0	0	0		2.68683	3.51895	0		0.00205668	0.000302725	1
CHRNA7	0	0	0		0	1.56278	0		1	0.0273662	1
CHST11	0	0	0		1.42961	0	0		0.0371867	1	1
CHUK	2.991	2.61	0		11.713	8.36889	0		1.93642e-12	4.27672e-09	1
Ciap	-1	0	0		3.01527	3.18531	0		0.00096546	0.000652667	1
CIITA	0	0	0		1.41024	0	0		0.0388826	1	1
CIP2A	-1.664	0	0		2.97115	0	0		0.00106869	1	1
CITED2	-2.2	0	0		4.59696	2.81425	0		2.52953e-05	0.00153372	1
CKS1B	0	0	0		0	1.30934	0		1	0.049052	1
CLCA2	0	0	0		1.68861	0	0		0.0204827	1	1
CLDN1	0	0	0		0	1.45239	0		1	0.0352865	1
CLDN7	-2.354	-1.067	0		5.26207	1.86637	0		5.46927e-06	0.0136027	1
CLEC10A	0	0	0		1.62142	0	0		0.0239101	1	1
CLEC11A	0	0	0		0	4.08455	0		1	8.23091e-05	1
CLEC1B	0	0	0		1.68861	0	1.67217		0.0204827	1	0.0212729
CLEC2A	0	0	0		2.15902	2.98103	0		0.00693397	0.00104465	1
CLEC4D	0	0	0		0	1.37475	0		1	0.0421938	1
CLEC4E	0	0	0		1.76243	0	0		0.0172812	1	1
CLEC4M	0	0	0		2.15902	2.98103	0		0.00693397	0.00104465	1
CLEC6A	0	0	0		0	1.37475	0		1	0.0421938	1
CLEC7A	0.277	0.277	0		2.64232	4.2219	0		0.00227866	5.99928e-05	1
CLIC1	0	0	0		1.72656	2.14518	0		0.0187691	0.00715845	1
CLIC4	0	0	0		0	1.30934	0		1	0.049052	1
CLOCK	-1	0	0		2.00464	0	0		0.00989368	1	1
Clock-Bmal1	0	0	0		1.42961	1.8457	0		0.0371867	0.014266	1
CLU	1.067	0	0		3.45577	2.77514	0		0.000350133	0.00167828	1
CMA1	0	0	0		2.29974	1.37475	0		0.00501491	0.0421938	1
CNDP2	0	0	0		0	3.81793	0		1	0.000152079	1
CNEP1R1	0	0	0		0	1.67115	0		1	0.0213229	1
CNOT7	0	0	0		8.42961	4.16432	0		3.71866e-09	6.84977e-05	1
CNR2	0	0	0		2.29347	3.49379	0		0.00508776	0.000320785	1
CNTFR	0	0	0		2.68683	1.54776	0		0.00205668	0.0283296	1
COL17A1	0	0	0		1.42961	1.8457	0		0.0371867	0.014266	1
COL18A1	0	0	0		0	1.55802	0		1	0.0276684	1
COL1A1	0	0	0		2.6885	2.35851	0		0.00204882	0.00438016	1
COL3A1	0	0	0		1.72656	0	0		0.0187691	1	1
COL4A3	0	0	0		1.86168	0	0		0.0137504	1	1
COL6A1	0	0	0		0	2.35851	1.60598		1	0.00438016	0.0247752
COL7A1	0	0	0		0	1.67115	0		1	0.0213229	1
Collagen Alpha1	0	0	0		1.50301	0	0		0.0314041	1	1
Collagen type I	0.97	0	0		2.72877	1.87406	0		0.00186735	0.013364	1
Collagen type II	1.155	1.89	0		12.0375	9.08257	0		9.17348e-13	8.26859e-10	1
Collagen type IV	2	0	0		3.16455	1.97021	0		0.000684621	0.0107099	1
Collagen(s)	0	0	0		1.84512	1.30205	0		0.0142851	0.0498822	1
COMMD1	0	0	0		0	1.83005	1.35832		1	0.0147893	0.0438209
COMP	0	0	0		0	1.8457	0		1	0.014266	1
Convulxin	0	0	0		0	1.54776	0		1	0.0283296	1
COPA	0	0	0		0	1.54776	0		1	0.0283296	1
CORT	-1.387	-1.982	0		3.27484	3.9041	0		0.000531075	0.000124711	1
COX6A2	0	0	0		1.42961	0	0		0.0371867	1	1
CR2	0	0	0		0	2.24245	0		1	0.00572208	1
CRABP2	0	0	0		0	1.54776	0		1	0.0283296	1
CRADD	0	0	0		1.42961	1.8457	0		0.0371867	0.014266	1
Creb	0	0	0		0	1.55915	0		1	0.027596	1
CREB1	0.223	0.529	0		8.41742	4.78418	0		3.82457e-09	1.64369e-05	1
CREB3	0	0	0		1.45035	0	0		0.0354525	1	1
CREB3L1	0	0	0		0	0	1.49835		1	1	0.0317433
CREB3L2	0	0	0		1.8442	0	0		0.0143152	1	1
CREB3L4	0	0	0		2.47041	1.45239	0		0.00338524	0.0352865	1
CREBBP	0.896	-1.342	0		7.47783	6.01087	0		3.32792e-08	9.75272e-07	1
CREB-NFkB	0	0	0		1.72656	2.14518	0		0.0187691	0.00715845	1
CRH	0	0	0		0	1.63454	0		1	0.0231987	1
CRIP2	0	0	0		0	1.67115	0		1	0.0213229	1
CRLF1	0	0	0		0	1.54776	0		1	0.0283296	1
CRP	0	0	0		1.96942	3.48572	0		0.0107295	0.000326796	1
CRTC1	0	0	0		1.45035	0	0		0.0354525	1	1
CSF1	-1.169	0.555	0		10.7071	3.52125	0		1.96296e-11	0.000301126	1
CSF1R	0	0	0		4.36448	1.58559	0		4.32036e-05	0.025966	1
CSF3	0.781	0.692	0		4.89405	4.20327	0		1.27628e-05	6.26231e-05	1
CSF3R	0	0	0		0	0	1.60598		1	1	0.0247752
CSK	0	0	0		1.62142	0	0		0.0239101	1	1
CSNK2A1	0	0	0		2.43523	0	0		0.00367092	1	1
CST3	0	0	0		2.78717	2.42342	0		0.0016324	0.0037721	1
CST5	-1.508	0	0		1.79368	0	0		0.0160814	1	1
CSTB	0	0	0		0	1.54776	0		1	0.0283296	1
CTGF	-0.14	0	0		1.80697	0	0		0.0155964	1	1
CTLA4	-0.647	-1.067	0		2.69666	2.79384	0		0.00201068	0.00160752	1
CTNNB1	0.3	1.311	0		5.44918	5.3123	0		3.55486e-06	4.87188e-06	1
CTNND1	0	0	0		1.93573	2.75104	0		0.011595	0.00177403	1
CTSA	0	0	0		1.42961	0	0		0.0371867	1	1
CTSC	0	0	0		0	1.37475	0		1	0.0421938	1
CTSE	0	0	0		2.15902	1.30934	0		0.00693397	0.049052	1
CTSG	0	0	0		2.6885	3.90758	0		0.00204882	0.000123715	1
CTSS	1	0	0		2.69806	0	0		0.0020042	1	1
CTSZ	0	0	0		1.93573	0	0		0.011595	1	1
CUL7	0	0	0		0	1.30934	0		1	0.049052	1
CUX1	0	0	0		1.63017	3.09968	0		0.0234332	0.000794915	1
CUZD1	0	0	0		2.47041	0	0		0.00338524	1	1
CX3CL1	0.963	0	0		4.76677	1.71154	0		1.71092e-05	0.0194296	1
CX3CR1	-0.391	0	0		3.72971	1.73948	1.31023		0.000186335	0.0182189	0.048952
CXCL1	0	0	0		1.55982	2.35851	0		0.0275536	0.00438016	1
CXCL10	1.934	0	0		2.64232	1.71154	0		0.00227866	0.0194296	1
CXCL11	0	0	0		0	1.54776	0		1	0.0283296	1
CXCL12	1.026	1.677	0		9.58543	4.8039	2.27495		2.59758e-10	1.57072e-05	0.00530947
CXCL16	0	0	0		2.03948	0	0		0.00913103	1	1
CXCL2	1.997	1.997	0		3.72998	5.36571	0		0.000186218	4.30809e-06	1
CXCL3	1.981	1.981	0		3.24526	4.86086	0		0.000568516	1.37767e-05	1
Cxcl3	0	0	0		0	1.45239	0		1	0.0352865	1
CXCL6	0	0	0		2.15902	1.30934	0		0.00693397	0.049052	1
CXCL8	2.247	2.027	0		2.75948	5.35122	0		0.00173988	4.45428e-06	1
CXCR2	0	0	0		0	1.97021	0		1	0.0107099	1
CXCR4	2	0	0		2.18341	2.96435	0		0.00655529	0.00108556	1
CYBA	0	0	0		1.62142	0	0		0.0239101	1	1
CYBB	0	0	0		1.4382	1.49834	0		0.0364584	0.0317438	1
Cyclin B	0	0	0		0	1.67115	0		1	0.0213229	1
CYLD	0	0	0		1.46706	1.51919	0		0.0341148	0.0302556	1
CYP27B1	-2	0	0		3.27484	2.66513	2.74734		0.000531075	0.00216208	0.00178922
CYP2C8	0	0	0		0	1.45239	0		1	0.0352865	1
CYP2E1	0	0	0		1.90686	1.83005	1.45334		0.0123921	0.0147893	0.0352092
CYP2J2	-0.186	-0.6	0		5.48798	6.27077	0		3.25104e-06	5.36076e-07	1
Cyp4a14	0	0	0		3.14615	0	0		0.000714249	1	1
CYR61	2.201	2.186	0		5.26824	3.3903	0		5.39215e-06	0.000407095	1
cytokine	2.119	2.535	0		5.74592	3.83525	0		1.79505e-06	0.000146132	1
DAB2IP	0	0	0		1.76243	2.57107	0		0.0172812	0.00268493	1
DACH1	0	0	0		1.46706	0	0		0.0341148	1	1
DAGLA	0	0	0		0	1.45239	0		1	0.0352865	1
DAPK1	0	0	0		2.68683	3.51895	0		0.00205668	0.000302725	1
DCN	-0.61	0	0		3.29314	2.16506	0		0.000509172	0.00683823	1
DDB2	0	0	0		4.26955	5.92146	0		5.37583e-05	1.19822e-06	1
DDIT3	0.81	-0.692	0		4.84851	2.79201	0		1.41738e-05	0.00161431	1
DDX58	2.789	2.935	0		16.5549	11.567	0		2.78657e-17	2.71028e-12	1
DEF6	0	0	0		2.36208	0	0		0.00434432	1	1
DEFA1 (includes others)	0	0	0		2.98243	1.67115	0		0.00104129	0.0213229	1
DEK	0	0	0		1.93573	2.75104	0		0.011595	0.00177403	1
DEPDC1	0	0	0		1.72656	0	0		0.0187691	1	1
DEPTOR	0	0	0		2.03948	0	0		0.00913103	1	1
DES	0	0	0		2.03948	0	1.84675		0.00913103	1	0.0142314
Dgk	0	0	0		2.15902	2.98103	0		0.00693397	0.00104465	1
DGKE	0	0	0		0	1.30934	0		1	0.049052	1
DGKH	0	0	0		2.98243	3.81793	0		0.00104129	0.000152079	1
DHODH	0	0	0		0	2.14518	0		1	0.00715845	1
DHX58	0	0	0		1.8442	0	0		0.0143152	1	1
DHX9	0	0	0		1.35548	0	0		0.0441082	1	1
DICER1	-0.631	-1.667	0		4.7004	2.19275	0		1.99341e-05	0.00641577	1
DIRAS3	0	0	0		1.40132	0	0		0.03969	1	1
DKK2	0	0	0		1.72656	0	2.74719		0.0187691	1	0.00178981
DLC1	0	0	0		0	1.30934	0		1	0.049052	1
DLG1	0	0	0		0	1.30934	0		1	0.049052	1
DLX3	0	0	0		1.35548	0	0		0.0441082	1	1
DMD	0	0	0		0	3.01848	0		1	0.000958346	1
DMP1	0	0	0		1.35684	1.43918	0		0.0439702	0.0363765	1
DNAJA3	0	0	0		0	1.37475	0		1	0.0421938	1
DNAJB6	0	0	0		1.40132	0	1.52279		0.03969	1	0.0300059
DNASE2	-1.543	0	0		6.76741	4.00312	0		1.7084e-07	9.92847e-05	1
DNMT1	0	0	0		0	1.66147	0		1	0.0218037	1
DNMT3B	0	0	0		1.32234	2.06464	0		0.0476062	0.00861701	1
DNTTIP1	0	0	0		1.42961	0	0		0.0371867	1	1
DOCK8	2.53	2.333	0		6.20844	8.80871	0		6.18811e-07	1.55344e-09	1
DPH5	0	0	0		1.45035	2.24245	0		0.0354525	0.00572208	1
DPP4	-1.179	0	0		3.80519	2.98529	0		0.000156606	0.00103445	1
DRD2	0	0	0		0	1.49834	0		1	0.0317438	1
DSC2	0	0	0		1.72656	2.14518	0		0.0187691	0.00715845	1
DTX1	0	0	0		1.90686	0	1.34166		0.0123921	1	0.0455343
DUOX1	0	0	0		0	1.67115	0		1	0.0213229	1
DUSP1	0.021	-0.046	0		20.8374	19.6537	0		1.45398e-21	2.21994e-20	1
DUSP4	0	0	0		1.76243	0	0		0.0172812	1	1
DUSP5	0	0	0		2.22891	0	0		0.00590317	1	1
DYSF	0	0	0		4.76616	5.79774	0		1.71334e-05	1.59316e-06	1
E2F1	0.342	-1.026	0		2.18653	2.49242	0		0.00650833	0.00321793	1
Ea4	0	0	0		1.72656	2.14518	0		0.0187691	0.00715845	1
EAF2	0	0	0		0	1.54776	0		1	0.0283296	1
EBI3	-0.64	0	0		4.08623	2.1213	0		8.19925e-05	0.00756315	1
ECSIT	3.066	2.745	0		10.5084	10.94	0		3.10182e-11	1.14828e-11	1
EDF1	0	0	0		1.42961	0	0		0.0371867	1	1
EDN1	2.325	2.22	0		4.05248	2.2609	0		8.86175e-05	0.00548399	1
EFEMP1	0	0	0		0	1.45239	0		1	0.0352865	1
EFNA1	-1.342	0	0		2.12649	0	0		0.00747327	1	1
EFNB1	0	0	0		0	1.37475	0		1	0.0421938	1
EGF	2.237	2.312	0		5.35184	6.43816	0		4.44793e-06	3.64617e-07	1
EGFL7	0	0	0		2.68683	3.51895	0		0.00205668	0.000302725	1
EGFR	2.22	1.294	0		4.45113	4.75337	0		3.5389e-05	1.76454e-05	1
Egfr-Erbb2	0	0	0		0	1.67115	0		1	0.0213229	1
EGLN	0	-2	0		0	1.53297	0		1	0.0293107	1
EGLN1	0	0	0		2.15467	0	0		0.00700378	1	1
EGR1	1.776	2.785	0		8.4465	5.01665	0		3.57681e-09	9.62399e-06	1
EGR4	0	0	0		2.15902	0	0		0.00693397	1	1
EHF	1.744	0	0		4.96478	0	0		1.08447e-05	1	1
EHHADH	0	0	0		2.51351	2.24245	0		0.00306545	0.00572208	1
Eif2	0	0	0		0	1.67115	0		1	0.0213229	1
EIF2AK1	0	0	0		0	1.37475	0		1	0.0421938	1
EIF2AK2	3.446	2.114	0		13.544	8.61684	0		2.85739e-14	2.41635e-09	1
EIF2AK3	0	0	0		1.77095	1.36041	0		0.0169454	0.0436107	1
EIF2AK4	0	0	0		1.69894	2.85473	0		0.0200013	0.00139723	1
EIF2S1	0	0	0		3.16455	3.29944	0		0.000684621	0.000501838	1
EIF3E	0	0	0		1.41024	1.47807	0		0.0388826	0.0332603	1
EIF4B	0	0	0		1.42961	0	0		0.0371867	1	1
EIF4E	1.134	0	0		2.42499	0	0		0.00375844	1	1
ELANE	2.207	1.98	0		3.16387	3.81094	0		0.000685691	0.000154547	1
elastase	0	0	0		1.76243	0	0		0.0172812	1	1
ELF1	0	0	0		2.7561	0	0		0.00175346	1	1
ELF2	0	0	0		0	1.45239	0		1	0.0352865	1
ELF3	0	0	0		1.69894	0	0		0.0200013	1	1
ELF4	0.956	0	0		4.43927	0	0		3.63693e-05	1	1
ELK1	1.134	0	0		4.08623	0	0		8.19925e-05	1	1
ELN	0	0	0		4.11633	0	0		7.65011e-05	1	1
ENG	0	0	0		3.00981	0	0		0.000977661	1	1
ENPP1	0	0	0		0	0	2.14627		1	1	0.00714054
ENTPD1	0	0	0		1.40132	0	0		0.03969	1	1
EP300	0.341	1.026	0		7.54318	6.85562	0		2.86299e-08	1.39437e-07	1
EPAS1	0.795	0.844	0		2.08819	2.31769	0		0.00816217	0.00481186	1
EPHX2	0	0	0		1.55953	2.70064	0		0.0275723	0.0019923	1
EPO	-0.808	0	0		2.79214	0	0		0.00161382	1	1
EPS15	0	0	0		1.72656	0	0		0.0187691	1	1
EPSTI1	0	0	0		1.72656	2.14518	0		0.0187691	0.00715845	1
ERBB2	1.406	1.626	0		2.74332	4.33015	0		0.00180584	4.6757e-05	1
ERBB3	-1.673	0	0		2.20231	0	0		0.00627615	1	1
ERBB4	0	0	0		0	1.5955	0		1	0.0253803	1
ERC1	0	0	0		2.98243	3.81793	0		0.00104129	0.000152079	1
ERCC2	0	0	0		0	1.30934	0		1	0.049052	1
EREG	0	0	0		1.31248	0	0		0.0486988	1	1
ERFE	0	0	0		1.8442	0	0		0.0143152	1	1
ERG	-0.493	0.218	0		2.63464	1.73432	0		0.00231932	0.0184366	1
ERK	3.532	2.83	0		13.6265	10.5685	0		2.36318e-14	2.70095e-11	1
ERK1/2	2.138	2.551	0		10.3593	10.0067	0		4.37216e-11	9.84598e-11	1
Erm	0	0	0		2.47041	3.29915	0		0.00338524	0.000502165	1
ERN2	0	0	0		0	1.45239	0		1	0.0352865	1
ERRFI1	0	0	0		2.03948	2.85814	0		0.00913103	0.00138631	1
ERVW-1	0	0	0		0	2.05101	0		1	0.00889179	1
ESR1	-0.866	-1.811	0		11.2303	7.61638	0		5.88445e-12	2.41892e-08	1
ESR2	-0.863	0	0		2.71407	0	0		0.00193164	1	1
ESRP1	0	0	0		0	1.37475	0		1	0.0421938	1
Esrra	0	0	0		2.08777	0	1.3766		0.00817019	1	0.0420143
ESRRA	-1.078	0	0		0	0	3.03381		1	1	0.00092511
ESRRB	0	0	0		1.86168	0	0		0.0137504	1	1
estrogen receptor	-0.082	-1.698	0		3.71742	2.11011	0		0.000191681	0.00776056	1
ETS1	0.311	0	0		5.34638	0	0		4.50426e-06	1	1
ETS2	1.446	0	0		3.39495	0	0		0.000402759	1	1
ETV3	0	0	0		0	0	1.97093		1	1	0.0106922
ETV4	0.227	0	0		4.36448	1.58559	0		4.32036e-05	0.025966	1
ETV5	-0.655	0	0		2.62781	2.28109	1.88413		0.00235606	0.00523489	0.0130578
EZH2	1.832	0.936	0		5.79964	5.65558	0		1.58621e-06	2.21014e-06	1
F Actin	0	0	0		2.29974	0	0		0.00501491	1	1
F10	0	0	0		2.6885	3.90758	0		0.00204882	0.000123715	1
F12	0	0	0		1.42961	1.8457	0		0.0371867	0.014266	1
F13A1	0	0	0		0	1.37475	0		1	0.0421938	1
F2	3.938	3.517	0		11.9849	9.59304	0		1.03548e-12	2.55248e-10	1
F2R	2.092	2.381	0		7.71047	4.83778	0		1.94772e-08	1.45283e-05	1
F2RL1	2.582	2.164	0		6.26918	5.031	0		5.38041e-07	9.31114e-06	1
F3	2.401	0	0		3.54881	2.84053	0		0.000282614	0.00144367	1
F7	1.936	0	0		2.14488	2.50241	0		0.00716342	0.00314475	1
FABP4	0.692	0	0		2.6975	1.33389	0		0.0020068	0.0463568	1
FABP5	0	0	0		2.11033	3.29944	0		0.00775665	0.000501838	1
FADD	2.339	2	0		4.38721	2.43158	0		4.10003e-05	0.0037019	1
FAF1	0	0	0		0	1.45239	0		1	0.0352865	1
FALEC	0	0	0		0	1.30934	0		1	0.049052	1
FAM3B	0	0	0		2.05563	1.93273	1.39378		0.00879766	0.0116752	0.0403853
FANCC	0	0	0		2.69666	2.79384	0		0.00201068	0.00160752	1
FANCD2	0	0	0		3.29497	4.53295	0		0.000507023	2.93121e-05	1
FAS	1.396	2.183	0		19.3828	16.2293	0		4.14229e-20	5.8974e-17	1
FASLG	1.516	1.261	0		4.08879	6.48228	0		8.15094e-05	3.29394e-07	1
FBXL5	0	0	0		2.47041	3.29915	0		0.00338524	0.000502165	1
FBXO32	-0.739	0	0		1.67832	1.64791	0		0.0209738	0.0224953	1
FBXO42	0	0	0		3.29497	2.75104	0		0.000507023	0.00177403	1
FBXW7	0	0	0		1.73261	0	0		0.0185091	1	1
Fc gamma receptor	1.342	2	0		4.43927	5.38093	0		3.63693e-05	4.15975e-06	1
Fcer1	3.139	3.001	0		9.43365	13.2072	0		3.6843e-10	6.20614e-14	1
FCER1A	0	0	0		1.35548	0	0		0.0441082	1	1
FCER1G	0.692	0.963	0		4.92247	9.25385	0		1.19544e-05	5.57377e-10	1
FCER2	0	0	0		2.6885	3.90758	0		0.00204882	0.000123715	1
FCGR1A	0	0	0		0	2.05101	0		1	0.00889179	1
FCGR2A	2.205	2.205	0		4.22222	5.19352	0		5.99484e-05	6.40439e-06	1
FCGR2B	-1.982	0	0		2.48741	1.63345	0		0.00325526	0.023257	1
Fcgr3	0	0	0		0	2.09474	0		1	0.00804015	1
FCN1	0	0	0		1.72656	2.14518	0		0.0187691	0.00715845	1
Fcor	0	0	0		1.76243	2.57107	0		0.0172812	0.00268493	1
FDX2	0	0	0		0	1.54776	0		1	0.0283296	1
FDXR	0	0	0		0	1.45239	0		1	0.0352865	1
FEM1A	0	0	0		3.01392	2.57107	0		0.00096845	0.00268493	1
FENDRR	0	0	0		1.72656	0	0		0.0187691	1	1
Ferritin	0	0	0		3.14615	4.38034	0		0.000714249	4.16541e-05	1
FFAR1	0	0	0		1.55982	0	0		0.0275536	1	1
FFAR3	0.378	0	0		2.96016	2.48573	0		0.00109608	0.00326791	1
FGA	0	0	0		0	1.54776	0		1	0.0283296	1
FGB	0	0	0		1.42961	1.8457	0		0.0371867	0.014266	1
FGF1	-0.318	-0.749	0		3.75508	2.60795	1.67645		0.000175759	0.00246634	0.0210644
FGF10	1.982	0	0		1.68023	0	0		0.020882	1	1
FGF19	0	0	0		1.58229	0	0		0.0261646	1	1
FGF2	0.764	1.076	0		8.10479	3.64567	0		7.8562e-09	0.000226116	1
FGF20	0	0	0		1.42961	0	0		0.0371867	1	1
FGF8	0	0	0		0	1.53383	1.92791		1	0.029253	0.0118057
Fgfr	0	0	0		0	0	1.49835		1	1	0.0317433
FGFR2	0.686	0	0		2.49434	1.84386	0		0.00320378	0.0143266	1
FGFR3	1.951	0	0		3.05963	1.47807	0		0.000871706	0.0332603	1
FGG	0	0	0		0	1.45239	0		1	0.0352865	1
Fibrin	0	0	0		2.05563	1.93273	0		0.00879766	0.0116752	1
Fibrinogen	2.536	2.345	0		9.97232	11.7683	0		1.0658e-10	1.70489e-12	1
FKBP5	0	0	0		1.93573	2.75104	0		0.011595	0.00177403	1
FLI1	0	0	0		1.51416	0	0		0.0306085	1	1
FLII	0	0	0		0	1.54776	0		1	0.0283296	1
FLT1	0.333	0.447	0		4.76616	3.58507	0		1.71334e-05	0.000259974	1
FLT4	0	0	0		0	1.37475	0		1	0.0421938	1
FN1	2.7	3.07	0		13.4215	9.36894	0		3.78853e-14	4.27623e-10	1
FNDC5	0	0	0		1.50301	0	1.5764		0.0314041	1	0.0265218
FOLR1	0	0	0		0	1.51026	0		1	0.0308847	1
FOSB	0	0	0		4.29218	1.56278	0		5.10291e-05	0.0273662	1
FOSL1	-0.163	-1.474	0		8.80531	5.91246	0		1.56565e-09	1.22332e-06	1
FOSL2	0	0	0		1.87501	1.31779	0		0.013335	0.0481076	1
FOXC2	1.047	0	0		2.36878	0	0		0.00427777	1	1
FOXL2	2.483	2.438	0		6.45805	5.14557	0		3.48295e-07	7.15208e-06	1
FOXM1	1.23	1.091	0		3.00712	3.3827	0		0.000983731	0.000414286	1
FOXO1	2.72	1.793	0		7.03208	7.68025	0		9.28788e-08	2.08808e-08	1
FOXO3	1.031	0.314	0		8.32451	4.54158	0		4.73687e-09	2.87355e-05	1
FOXO4	2.399	1.981	0		4.08857	3.19411	0		8.15518e-05	0.000639573	1
FOXP3	-1.131	0	0		3.08438	0	0		0.000823415	1	1
FPR2	0	0	0		1.40132	3.64303	0		0.03969	0.000227494	1
FSH	0.38	0	0		2.98139	0	0		0.00104378	1	1
FST	0.218	0	0		1.78751	0	0		0.0163114	1	1
FTH1	0	0	0		1.45035	0	0		0.0354525	1	1
FTL	0	0	0		0	1.54776	0		1	0.0283296	1
FTMT	0	0	0		0	1.67115	0		1	0.0213229	1
FUS	0	0	0		0	1.67115	0		1	0.0213229	1
FXYD5	0	0	0		1.42961	1.8457	0		0.0371867	0.014266	1
FYN	0	0	0		1.90566	1.33389	0		0.0124261	0.0463568	1
FZD5	0	0	0		0	0	4.18589		1	1	6.51799e-05
FZD8	0	0	0		1.35548	0	0		0.0441082	1	1
FZD9	0	0	0		2.43523	0	0		0.00367092	1	1
G3BP1	0	0	0		2.15902	0	1.90437		0.00693397	1	0.0124633
GAB1	0	0	0		1.40132	0	0		0.03969	1	1
GAB2	0	0	0		0	1.60913	0		1	0.0245961	1
GABBR1	0	0	0		0	0	1.60598		1	1	0.0247752
GALP	0	0	0		2.03948	0	0		0.00913103	1	1
GAPDH	0.548	0.97	0		10.1648	6.55227	0		6.84164e-11	2.80371e-07	1
GAS6	0	0	0		1.86168	0	0		0.0137504	1	1
GAS7	0	0	0		0	0	2.14627		1	1	0.00714054
GATA2	0.765	1.664	0		2.79682	2.61461	0		0.00159655	0.00242881	1
GATA3	-0.6	0	0		2.40788	1.62104	0		0.00390953	0.0239311	1
GATA4	-1	0	0		1.84122	2.46878	0		0.0144138	0.00339794	1
GATA6	-0.368	0	0		1.50344	0	0		0.0313734	1	1
GATAD2B	0	0	0		1.42961	1.8457	0		0.0371867	0.014266	1
GBP2	0	0	0		1.72656	0	0		0.0187691	1	1
GBX2	0	0	0		1.8442	0	0		0.0143152	1	1
GCG	0	-0.132	0		0	2.34589	0		1	0.00450935	1
GC-GCR dimer	0	0	0		2.51351	2.24245	0		0.00306545	0.00572208	1
GCLC	0	0	0		0	1.45239	0		1	0.0352865	1
GDF15	0	0	0		2.16798	0	0		0.00679228	1	1
GDF2	0.592	1.934	0		3.46928	2.36259	0		0.000339408	0.0043392	1
GFAP	0	0	0		1.40132	3.64303	0		0.03969	0.000227494	1
GFI1	-1.308	-2.219	0		5.42036	4.00442	0		3.79877e-06	9.89865e-05	1
GH1	0.64	0	0		1.52752	0	0		0.0296812	1	1
GIP	0	0	0		1.31248	0	1.52279		0.0486988	1	0.0300059
GJA1	0.218	-0.115	0		5.56654	6.85432	0		2.71308e-06	1.39857e-07	1
GJB1	0	0	0		0	1.37475	0		1	0.0421938	1
GJB6	0	0	0		0	1.37475	0		1	0.0421938	1
GJC1	0	0	0		0	1.67115	0		1	0.0213229	1
GLI1	1.116	0	0		2.28499	0	0		0.00518812	1	1
GLI2	0	0	0		4.46915	4.91648	0		3.3951e-05	1.21205e-05	1
GLI3	0	0	0		1.37053	0	0		0.0426059	1	1
GLIPR2	0	0	0		0	1.54776	0		1	0.0283296	1
glutathione peroxidase	0	0	0		0	1.67115	0		1	0.0213229	1
GNA12	0	0	0		1.80422	2.6211	0		0.0156955	0.00239276	1
GNA14	0	0	0		4.17536	6.03233	0		6.67798e-05	9.28268e-07	1
GNA15	0	0	0		3.51814	4.73655	1.75866		0.000303289	1.8342e-05	0.0174318
GNAI2	0	0	0		0	1.65858	0		1	0.0219492	1
GNAI3	2.121	2.646	0		8.43583	9.87957	1.43253		3.66583e-09	1.31956e-10	0.0369375
GNAQ	0	0	0		5.19223	6.38082	0		6.42342e-06	4.16082e-07	1
GNB1	0	0	0		4.99464	3.68085	0		1.01243e-05	0.00020852	1
GNB2	0	0	0		5.30573	3.85683	0		4.94618e-06	0.000139051	1
GNLY	0	0	0		0	1.45239	0		1	0.0352865	1
GNPAT	0	0	0		2.68683	1.54776	0		0.00205668	0.0283296	1
GPBP1	0	0	0		1.42961	1.8457	0		0.0371867	0.014266	1
GPER1	2.121	0	0		4.97217	0	0		1.06618e-05	1	1
GPI	0	0	0		2.43523	2.19012	0		0.00367092	0.00645469	1
GPIIB-IIIA	0	0	0		2.03948	0	0		0.00913103	1	1
GPR132	0	0	0		1.76243	2.57107	0		0.0172812	0.00268493	1
GPR17	0	0	0		0	1.45239	0		1	0.0352865	1
GPR32	0	0	0		1.42961	1.8457	0		0.0371867	0.014266	1
GPR4	0	0	0		0	1.54776	0		1	0.0283296	1
GPR84	0	0	0		2.03948	2.85814	0		0.00913103	0.00138631	1
GPS2	-1.265	-0.378	0		6.7973	6.62368	0		1.59476e-07	2.37861e-07	1
GPSM3	0	0	0		1.72656	2.14518	0		0.0187691	0.00715845	1
GPX1	-1.528	-1.213	0		3.33745	4.41517	0		0.000459782	3.84439e-05	1
Growth hormone	0.095	-0.128	0		2.60239	4.13544	0		0.00249809	7.3208e-05	1
Gsk3	-0.728	-0.025	0		2.35143	3.50953	0		0.00445213	0.000309366	1
GSK3A	0	0	0		0	1.97021	0		1	0.0107099	1
GSK3B	1.224	1.82	0		3.22373	4.47775	0		0.000597413	3.32854e-05	1
GSTM1	0	0	0		1.42961	1.8457	0		0.0371867	0.014266	1
GTF2B	0	0	0		1.52766	0	0		0.0296713	1	1
GTF2I	0	0	0		1.55982	2.35851	0		0.0275536	0.00438016	1
GZMA	0	0	0		2.98243	3.81793	0		0.00104129	0.000152079	1
H2AFY	-0.447	0	0		2.36878	0	0		0.00427777	1	1
HABP2	0	0	0		0	1.54776	0		1	0.0283296	1
HAMP	0	0	0		0	1.37475	0		1	0.0421938	1
HAND2	0	0	0		0	1.92612	0		1	0.0118544	1
HAS1	0	0	0		0	1.30934	0		1	0.049052	1
HAS2	0	0	0		3.14615	0	0		0.000714249	1	1
HAVCR2	0	0	0		0	2.19012	0		1	0.00645469	1
Hbb	0	0	0		1.55982	2.35851	0		0.0275536	0.00438016	1
HBB	0	0	0		0	1.45239	0		1	0.0352865	1
Hbb-b1	-0.788	0.956	0		4.12417	6.38054	0		7.51332e-05	4.16349e-07	1
Hbb-b2	0	1.633	0		4.52851	7.31218	0		2.96133e-05	4.87326e-08	1
Hdac	-1.079	-0.256	0		2.89783	1.49141	1.44429		0.00126524	0.0322545	0.0359509
HDAC1	1.633	0	0		3.29812	3.18676	0		0.000503365	0.000650496	1
HDAC10	0	0	0		1.93573	0	0		0.011595	1	1
HDAC11	0	0	0		3.29497	2.75104	0		0.000507023	0.00177403	1
HDAC2	0.447	0	0		1.8563	1.78936	0		0.0139219	0.0162418	1
HDAC3	0	0	0		4.12417	4.20021	0		7.51332e-05	6.30649e-05	1
HDAC4	0	0	0		1.48387	0	0		0.0328196	1	1
HDAC6	0	0	0		0	1.4205	0		1	0.0379752	1
HDL	-1.269	-1.96	0		3.80169	2.99043	0		0.000157873	0.00102228	1
hemoglobin	0	0	0		2.11033	1.97021	0		0.00775665	0.0107099	1
HERC5	0	0	0		0	1.67115	0		1	0.0213229	1
HEY2	0	0	0		0	1.63345	0		1	0.023257	1
HGF	1.677	1.506	0		9.05889	6.7627	0		8.73188e-10	1.72704e-07	1
HIF1A	1.554	1.627	0		5.58844	3.53246	0		2.57965e-06	0.000293456	1
HIST2H3C	0	0	0		1.76243	0	0		0.0172812	1	1
HIST4H4	0	0	0		0	1.30934	1.90437		1	0.049052	0.0124633
histone deacetylase	0	0	0		1.41024	0	0		0.0388826	1	1
Histone h3	0	0	0		5.12554	7.42814	0		7.4896e-06	3.73128e-08	1
Histone h4	0	0	0		3.9407	4.93144	1.54035		0.000114631	1.17101e-05	0.0288171
HLA-DQ	0	0	0		0	1.30934	0		1	0.049052	1
HLA-DR	0	0	0		0	1.37475	0		1	0.0421938	1
HLA-G	0	0	0		1.8442	0	0		0.0143152	1	1
HLX	-1.937	-2.425	0		5.65962	6.93607	0		2.18968e-06	1.1586e-07	1
HMGA1	0.99	0	0		1.61726	0	0		0.0241403	1	1
HMGA2	0	0	0		2.16798	0	1.43253		0.00679228	1	0.0369375
HMGB1	3.158	3.312	0		12.1455	11.7501	0		7.15345e-13	1.77805e-12	1
Hmgb1	0	0	0		1.40132	2.19012	0		0.03969	0.00645469	1
HMGB2	0	0	0		5.15063	4.4754	0		7.06917e-06	3.34656e-05	1
HMGN2	0	0	0		0	1.67115	0		1	0.0213229	1
HMOX1	-1.682	-1.818	0		5.15782	5.32184	0		6.95309e-06	4.76608e-06	1
HNF1B	-0.378	0	0		2.71058	0	0		0.00194723	1	1
HNF4A	-0.036	0.632	0		4.70709	3.11317	0		1.96294e-05	0.000770595	1
Hnp alpha	0	0	0		0	1.67115	0		1	0.0213229	1
HNRNPA1	0	0	0		0	2.00958	0		1	0.0097819	1
HNRNPAB	0	0	0		1.68861	0	1.67217		0.0204827	1	0.0212729
HNRNPU	0	0	0		1.45035	0	1.54875		0.0354525	1	0.0282654
Ho	0	0	0		0	1.37475	0		1	0.0421938	1
HOOK3	0	0	0		1.72656	0	0		0.0187691	1	1
HOTAIR	0	0	0		1.31248	0	0		0.0486988	1	1
HOXA10	-2.121	0	0		1.67106	0	0		0.0213276	1	1
HOXA7	0	0	0		0	2.94014	0		1	0.00114778	1
HOXA9	-1	0	0		5.19556	2.76695	0		6.37435e-06	0.0017102	1
HOXB7	0	0	0		3.14615	2.65617	0		0.000714249	0.00220712	1
HOXB9	0	0	0		1.35548	0	0		0.0441082	1	1
HOXC9	0	0	0		1.50301	0	1.5764		0.0314041	1	0.0265218
HOXD10	0.447	0	0		2.18341	1.98095	0		0.00655529	0.0104485	1
HPS1	0	0	0		0	1.8457	0		1	0.014266	1
HPSE	0	0	0		2.89505	0	0		0.00127335	1	1
HRAS	0.57	0.36	0		9.03902	4.68428	0		9.14074e-10	2.06882e-05	1
Hrg	0	0	0		3.33058	0	1.45334		0.000467109	1	0.0352092
HRG	-2	0	0		2.29974	1.37475	0		0.00501491	0.0421938	1
HS6ST1	0	0	0		1.93573	0	0		0.011595	1	1
HS6ST2	0	0	0		0	1.54776	0		1	0.0283296	1
HSD17B4	0	0	0		1.81844	1.76849	0		0.0151901	0.0170415	1
HSF1	0	-0.686	0		0	1.85861	0		1	0.0138481	1
HSF2	0	0	0		0	1.51919	0		1	0.0302556	1
Hsp70	-0.686	0.033	0		3.38278	3.28034	0		0.000414206	0.000524392	1
HSP90AA1	0	0	0		2.89505	4.12168	0		0.00127335	7.55647e-05	1
HSP90B1	0.456	1.342	0		3.04668	4.15321	0		0.000898098	7.02734e-05	1
HSPA1A/HSPA1B	0	0	0		1.55982	2.35851	0		0.0275536	0.00438016	1
HSPB2	0	0	0		3.89995	5.14933	0		0.000125908	7.09046e-06	1
HSPB3	0	0	0		5.18265	6.44347	0		6.56676e-06	3.60187e-07	1
HSPB6	0	0	0		4.19487	5.44806	0		6.38451e-05	3.564e-06	1
HSPB8	0	0	0		2.89505	4.12168	0		0.00127335	7.55647e-05	1
HSPD1	0	0	0		0	1.83005	0		1	0.0147893	1
HTATIP2	0	0	0		0	0	1.39378		1	1	0.0403853
HTR7	0	0	0		1.76243	2.57107	0		0.0172812	0.00268493	1
HTT	-0.895	0	0		2.00645	0	1.42781		0.00985249	1	0.0373413
hyaluronidase	0	0	0		1.42961	0	0		0.0371867	1	1
IBSP	0	0	0		0	1.67115	0		1	0.0213229	1
IBTK	0	0	0		1.42961	1.8457	0		0.0371867	0.014266	1
ICAM1	1.664	1.982	0		4.46857	3.37956	0		3.3996e-05	0.000417294	1
ID1	0.437	0.988	0		3.47053	2.79384	0		0.000338434	0.00160752	1
ID2	0	0	0		0	1.90278	0		1	0.0125089	1
ID3	1.937	0.896	0		1.87994	3.22757	0		0.0131844	0.000592149	1
IDH1	0	0	0		1.63017	0	0		0.0234332	1	1
IDH2	0	0	0		1.45035	0	0		0.0354525	1	1
IDO1	0	0	0		0	1.97021	0		1	0.0107099	1
IFI16	3.063	2.181	0		9.8858	8.42691	0		1.30076e-10	3.74189e-09	1
IFI30	0	0	0		1.42961	0	0		0.0371867	1	1
IFIH1	2.574	2.219	0		13.584	9.16708	0		2.60587e-14	6.80636e-10	1
IFIT2	0	0	0		0	1.54776	0		1	0.0283296	1
IFITM3	0	0	0		1.72656	0	2.74719		0.0187691	1	0.00178981
Ifn	2.92	3.059	0		13.7652	8.81806	0		1.71705e-14	1.52034e-09	1
IFN alpha receptor	0	0	0		2.47041	1.45239	0		0.00338524	0.0352865	1
IFN alpha/beta	-0.503	1.276	0		9.49911	5.72392	0		3.16879e-10	1.88833e-06	1
IFN Beta	3.418	2.726	0		23.5488	16.9112	0		2.8264e-24	1.22686e-17	1
Ifn gamma	2.939	2.591	0		5.46212	7.28956	0		3.45046e-06	5.13377e-08	1
IFN type 1	1.873	1.188	0		6.55128	3.37956	0		2.8101e-07	0.000417294	1
IFNA1/IFNA13	2.542	1.991	0		10.46	6.78044	0		3.46729e-11	1.65789e-07	1
IFNA10	2.191	0	0		5.40207	3.90758	0		3.96212e-06	0.000123715	1
IFNA14	2.191	0	0		5.40207	3.90758	0		3.96212e-06	0.000123715	1
IFNA16	2.191	0	0		5.23272	3.81296	0		5.85163e-06	0.000153831	1
IFNA17	1.067	0	0		3.97668	2.35851	0		0.000105517	0.00438016	1
IFNA2	5.337	3.858	0		28.7722	15.1357	0		1.68969e-29	7.31624e-16	1
IFNA21	2.191	0	0		5.40207	3.90758	0		3.96212e-06	0.000123715	1
IFNA4	2.56	2.369	0		11.76	10.459	0		1.738e-12	3.47501e-11	1
Ifna4	0	0	0		2.29974	0	0		0.00501491	1	1
IFNA5	2.191	0	0		5.40207	3.90758	0		3.96212e-06	0.000123715	1
IFNA6	2.191	0	0		5.40207	3.90758	0		3.96212e-06	0.000123715	1
IFNA7	2.191	0	0		5.40207	3.90758	0		3.96212e-06	0.000123715	1
IFNA8	2.201	0	0		5.23272	3.81296	0		5.85163e-06	0.000153831	1
Ifnar	2.382	2.114	0		13.9802	7.60149	0		1.04665e-14	2.5033e-08	1
IFNAR1	1.821	1.458	0		23.0635	14.0078	0		8.63992e-24	9.82222e-15	1
IFNAR2	2.236	0	0		8.0618	2.38725	0		8.67364e-09	0.00409967	1
IFNB1	2.942	2.01	0		21.9925	14.4696	0		1.01748e-22	3.39182e-15	1
IFNE	1.915	0	0		4.78409	1.4023	0		1.64404e-05	0.0396004	1
IFNG	5.076	6.104	0		48.0854	29.6788	0		8.2141e-49	2.09505e-30	1
IFNGR1	2.449	0	0		4.58996	2.33384	0		2.57062e-05	0.00463614	1
IFNK	1.342	0	0		4.23714	1.93273	0		5.79245e-05	0.0116752	1
IFNL1	4.609	3.537	0		19.8897	14.8882	0		1.28918e-20	1.2937e-15	1
IFNL2	0	0	0		3.14615	4.38034	0		0.000714249	4.16541e-05	1
IFNL3	1.981	0	0		3.96615	3.0811	0		0.000108105	0.000829651	1
IFNL4	2.209	0	0		6.27514	0	0		5.30715e-07	1	1
IFNLR1	0	0	0		22.656	17.4653	0		2.20816e-23	3.42531e-18	1
IFNW1	0	0	0		1.35548	0	0		0.0441082	1	1
Iga	0	0	0		2.36208	2.14101	0		0.00434432	0.00722759	1
Ige	2.608	2.748	0		17.3211	13.38	0		4.77433e-18	4.16874e-14	1
IGF1	-0.639	0.094	0		6.40821	6.12269	0		3.90653e-07	7.5389e-07	1
IGF1R	0.369	0	0		1.47534	1.3341	0		0.0334705	0.046334	1
IGF2	-1.929	0	0		5.02813	1.99569	0		9.37275e-06	0.0100998	1
IGF2BP3	0	0	0		0	1.67115	0		1	0.0213229	1
IGFBP3	-0.928	-1.091	0		4.15447	3.81094	0		7.00701e-05	0.000154547	1
IGFBP7	0	0	0		1.45035	0	0		0.0354525	1	1
IgG	-1.236	0.886	0		12.1137	6.05499	0		7.69706e-13	8.81064e-07	1
IgG1	0	0	0		2.05563	0	1.41271		0.00879766	1	0.0386629
IgG2a	0	0	0		1.62142	2.42342	0		0.0239101	0.0037721	1
IgG2b	0	0	0		0	1.45239	0		1	0.0352865	1
IGHM	0	0	0		2.22249	2.56474	0		0.00599111	0.00272435	1
IGK	0	0	0		1.42961	1.8457	0		0.0371867	0.014266	1
Igm	-0.513	0	0		1.99344	2.79384	0		0.0101523	0.00160752	1
IHH	0	0	0		2.00364	0	1.37567		0.00991655	1	0.0421046
Ikb	0.689	0	0		3.01527	1.89697	0		0.00096546	0.0126773	1
IKBKB	3.36	2.275	0		11.1333	11.5419	0		7.35634e-12	2.87167e-12	1
IKBKE	1.747	1.02	0		8.6514	6.42767	0		2.23153e-09	3.73534e-07	1
IKBKG	2.45	1.219	0		5.63976	4.1837	0		2.29212e-06	6.55094e-05	1
IKK (complex)	1.103	1.103	0		3.16455	4.77613	0		0.000684621	1.67444e-05	1
IKZF2	0	0	0		1.49686	1.54066	0		0.0318522	0.0287963	1
IKZF3	0	0	0		2.11033	0	0		0.00775665	1	1
IL1	3.969	3.723	0		8.90743	7.28202	0		1.23757e-09	5.22369e-08	1
IL10	-2.033	-0.906	0		13.9395	13.2786	0		1.14941e-14	5.26468e-14	1
IL10RA	-3.414	-3.317	0		8.87607	4.78992	0		1.33024e-09	1.62211e-05	1
IL10RB	0	0	0		1.93573	2.75104	0		0.011595	0.00177403	1
IL11	-0.573	0	0		4.08623	3.1575	0		8.19925e-05	0.000695828	1
IL11RA	0	0	0		2.43523	2.19012	0		0.00367092	0.00645469	1
IL12 (complex)	1.104	2.269	0		9.12166	9.31537	0		7.5568e-10	4.83763e-10	1
IL12 (family)	1.524	1.767	0		3.83864	4.43349	0		0.000144999	3.68566e-05	1
IL12A	-0.394	0.818	0		3.29314	3.21766	0		0.000509172	0.000605817	1
IL12B	1.029	1.525	0		3.04668	4.15321	0		0.000898098	7.02734e-05	1
IL12RB2/IL23R	0	0	0		0	1.45239	0		1	0.0352865	1
IL13	-1.84	-0.652	0		27.3249	14.6724	2.2679		4.73225e-28	2.12607e-15	0.00539638
IL15	1.136	2.789	0		5.41812	4.06807	0		3.81839e-06	8.54936e-05	1
IL16	0	0	0		1.68861	0	0		0.0204827	1	1
IL17A	2.637	2.752	0		9.4793	5.75362	0		3.31665e-10	1.76353e-06	1
IL17a dimer	2.608	2.232	0		6.83039	6.27077	0		1.47778e-07	5.36076e-07	1
IL17C	2.207	0	0		3.88392	3.03223	0		0.000130641	0.000928474	1
IL17D	0	0	0		1.42961	1.8457	0		0.0371867	0.014266	1
IL17F	2.398	2.216	0		4.36448	5.3165	0		4.32036e-05	4.82508e-06	1
IL-17f dimer	2.433	2.219	0		6.35798	6.99111	0		4.38546e-07	1.02069e-07	1
IL17R	1.424	1.521	0		7.68181	6.85229	0		2.08062e-08	1.4051e-07	1
IL17RA	-0.298	0	0		4.5167	1.63345	0		3.04299e-05	0.023257	1
IL18	2.207	2.763	0		7.73663	6.93175	0		1.83387e-08	1.17017e-07	1
IL18R1	0	0	0		2.59764	2.2984	0		0.00252559	0.00503036	1
IL18RAP	0	0	0		2.03948	0	0		0.00913103	1	1
IL19	0	0	0		2.43523	0	0		0.00367092	1	1
IL1A	4.433	4.129	0		15.2418	12.6185	0		5.73124e-16	2.40739e-13	1
Il1bos	0	0	0		1.72656	2.14518	0		0.0187691	0.00715845	1
IL-1R	0	0	0		1.90686	0	0		0.0123921	1	1
IL1R1	1.515	1.432	0		4.64487	4.05114	0		2.26531e-05	8.88916e-05	1
IL1R2	0	0	0		2.78717	2.42342	0		0.0016324	0.0037721	1
IL1RAP	0	0	0		2.78717	2.42342	0		0.0016324	0.0037721	1
IL1RL2	0	0	0		2.78717	2.42342	0		0.0016324	0.0037721	1
IL1RN	-3.877	-3.22	0		24.0552	13.1979	0		8.80547e-25	6.34034e-14	1
IL2	2.96	2.529	0		12.8303	10.431	0		1.478e-13	3.70674e-11	1
IL20	0	0	0		1.8442	0	0		0.0143152	1	1
IL20RA	0	0	0		2.98243	3.81793	0		0.00104129	0.000152079	1
IL21	2.929	2.496	0		11.562	9.30234	0		2.74146e-12	4.98491e-10	1
IL22	1.017	0.163	0		3.86706	4.45552	0		0.000135813	3.50336e-05	1
IL22RA1	0	0	0		3.01392	2.57107	0		0.00096845	0.00268493	1
IL23	1	0	0		1.93712	1.35037	0		0.0115578	0.0446302	1
IL25	0.08	0.689	0		2.43605	3.18727	0		0.00366398	0.000649718	1
IL26	0	0	0		5.09311	4.70675	0		8.07034e-06	1.96448e-05	1
IL27	1.441	2.012	0		12.1395	11.428	0		7.2524e-13	3.73228e-12	1
IL27RA	0	-1.4	0		2.1831	3.72302	0		0.00655993	0.000189227	1
IL3	1.757	2.207	0		7.86464	8.30354	0		1.3657e-08	4.9712e-09	1
Il3	0	0	0		0	0	2.08706		1	1	0.00818349
IL31	0	0	0		1.31248	0	0		0.0486988	1	1
IL32	3.149	2.94	0		11.5833	10.9828	0		2.6101e-12	1.04041e-11	1
IL33	3.293	3.568	0		18.2139	13.8546	0		6.11048e-19	1.39751e-14	1
IL36A	1.987	0	0		3.80519	4.34366	0		0.000156606	4.53249e-05	1
IL36B	1.982	0	0		5.25767	4.54553	0		5.52498e-06	2.84755e-05	1
IL36G	0	0	0		2.16798	2.00958	0		0.00679228	0.0097819	1
IL36RN	0	0	0		2.68683	3.51895	0		0.00205668	0.000302725	1
IL37	-1.232	0	0		1.84512	2.25829	0		0.0142851	0.00551712	1
Il3r	0	0	0		0	1.67115	0		1	0.0213229	1
IL4I1	-2.236	-2	0		6.27514	6.28899	0		5.30715e-07	5.14056e-07	1
IL4R	0	0	0		0	1.38456	0		1	0.0412516	1
IL5	2.097	3.053	0		8.79344	6.72195	1.83258		1.60903e-09	1.89691e-07	0.0147035
IL6	1.98	2.793	0		16.0653	13.0585	0		8.60305e-17	8.73902e-14	1
IL6R	1.772	2.759	0		7.69814	7.09489	0		2.00382e-08	8.03739e-08	1
IL7	0.847	1.633	0		4.59037	3.99385	0		2.56819e-05	0.000101426	1
Il8r	0	0	0		1.68861	0	0		0.0204827	1	1
IL9	1.964	0	0		2.22249	1.49834	0		0.00599111	0.0317438	1
ILK	0.916	0	0		2.07172	1.4205	0		0.00847776	0.0379752	1
Immunoglobulin	0.716	-0.132	0		24.9436	14.2623	0		1.13872e-25	5.46619e-15	1
Immunoglobulin Lambda Light Chain	0	0	0		0	1.30934	0		1	0.049052	1
INAVA	0	0	0		0	1.67115	0		1	0.0213229	1
Inflammasome (Nalp3, Asc, Casp1)	0	0	0		0	1.45239	0		1	0.0352865	1
ING2	0	0	0		1.42961	0	2.44654		0.0371867	1	0.0035765
INHBA	-0.464	-0.339	0		3.43539	1.85861	0		0.000366955	0.0138481	1
INHBB	0	0	0		1.40132	0	0		0.03969	1	1
INPP5D	0	0	0		1.33132	1.4205	0		0.0466321	0.0379752	1
INS	-0.076	0	0		2.74619	1.42814	0		0.00179393	0.0373133	1
INSIG1	0.928	0.186	0		2.26005	3.78269	0		0.00549478	0.000164934	1
INSR	1.172	0	0		6.02181	5.0923	0		9.51017e-07	8.08546e-06	1
Insulin	-0.766	-0.496	0		3.73771	5.21787	1.40421		0.000182932	6.05522e-06	0.0394267
Integrinα	0	0	0		0	1.45239	0		1	0.0352865	1
Interferon alpha	3.736	3.624	0		18.3368	17.6235	0		4.6051e-19	2.37971e-18	1
IRAK1	0	0	0		0	1.47807	0		1	0.0332603	1
IRAK1/4	0	0	0		1.72656	2.14518	0		0.0187691	0.00715845	1
IRAK2	0	0	0		1.45035	2.24245	0		0.0354525	0.00572208	1
IRAK3	1.522	0	0		4.0522	3.13207	0		8.86751e-05	0.000737784	1
IRAK4	0.247	0	0		4.9044	4.75102	0		1.24625e-05	1.77411e-05	1
IRF1	3.288	2.665	0		16.5996	9.42536	0		2.51421e-17	3.75525e-10	1
IRF2	0.277	1.022	0		7.76881	4.43349	0		1.7029e-08	3.68566e-05	1
IRF3	3.449	2.326	0		21.8816	15.3698	0		1.3133e-22	4.26817e-16	1
IRF3 dimer	0	0	0		1.93573	0	0		0.011595	1	1
IRF4	-0.493	0	0		4.33885	1.56742	0		4.58299e-05	0.0270754	1
IRF5	4.153	2.934	0		14.1442	8.22592	0		7.17405e-15	5.94406e-09	1
IRF6	1.96	1.96	0		2.9144	3.59981	0		0.00121788	0.000251297	1
IRF7	5.08	3.651	0		16.7997	11.8108	0		1.58595e-17	1.54592e-12	1
IRF8	0.364	0.328	0		13.6912	2.46931	0		2.03617e-14	0.00339385	1
IRF9	1.746	1.969	0		5.54952	4.6269	0		2.82153e-06	2.361e-05	1
Irgm1	-1.508	-1.89	0		8.7608	7.18494	0		1.7346e-09	6.53214e-08	1
Irp	0	0	0		1.8442	2.65617	0		0.0143152	0.00220712	1
IRS1	0	0	0		1.92256	0	0		0.011952	1	1
IRS2	0	0	0		0	1.30205	0		1	0.0498822	1
ISCU	0	0	0		1.42961	1.8457	0		0.0371867	0.014266	1
ISG15	-1.984	0	0		5.38764	1.30934	0		4.096e-06	0.049052	1
ISGF3	1.964	0	0		6.91484	2.85814	0		1.21665e-07	0.00138631	1
ITCH	0	0	0		0	2.09474	0		1	0.00804015	1
ITGA1	0	0	0		1.77698	0	0		0.0167115	1	1
ITGA4	0	0	0		3.14615	2.65617	1.7506		0.000714249	0.00220712	0.0177583
ITGA5	0	0	0		1.90566	1.33389	0		0.0124261	0.0463568	1
ITGA9	1.982	1.982	0		3.24526	4.86086	0		0.000568516	1.37767e-05	1
ITGAM	0	0	0		3.80519	4.34366	0		0.000156606	4.53249e-05	1
ITGAV	0	0	0		2.30505	0	0		0.00495393	1	1
ITGAX	0	0	0		6.21973	7.90008	0		6.02935e-07	1.2587e-08	1
ITGB1	2.758	2.41	0		3.49383	4.16401	0		0.000320754	6.85472e-05	1
ITGB2	-0.485	0	0		4.46857	2.2829	0		3.3996e-05	0.00521315	1
ITGB3	0.882	0	0		3.28634	0	0		0.000517199	1	1
ITGB6	0	0	0		1.40132	0	0		0.03969	1	1
ITGBL1	0	0	0		0	1.67115	0		1	0.0213229	1
ITIH2	0	0	0		0	1.45239	0		1	0.0352865	1
ITK	0.894	0.594	0		2.93022	2.46744	0		0.0011743	0.0034085	1
ITPR	0	0	0		2.29974	3.12511	0		0.00501491	0.000749703	1
IVNS1ABP	0	0	0		1.42961	1.8457	0		0.0371867	0.014266	1
JAG1	0	0	0		2.30505	0	0		0.00495393	1	1
JAG2	-1.309	-1.982	0		5.14544	3.76636	0		7.15412e-06	0.000171254	1
JAK	2.534	2.63	0		10.8275	7.65801	0		1.48773e-11	2.19779e-08	1
JAK1	2.937	2.935	0		6.20844	10.198	0		6.18811e-07	6.33798e-11	1
JAK1/2	2.433	1.982	0		2.66511	2.77106	0		0.00216218	0.0016941	1
JAK2	1.878	2.192	0		3.07712	5.32184	0		0.000837304	4.76608e-06	1
Jnk	1.916	2.058	0		8.00711	6.16953	0		9.83768e-09	6.76813e-07	1
JUNB	0.6	0	0		6.08585	4.43349	0		8.20638e-07	3.68566e-05	1
JUND	0	0	0		2.69666	0	0		0.00201068	1	1
KAT5	1.342	0	0		1.82534	2.14607	0		0.0149507	0.00714383	1
KCNE3	0	0	0		2.66511	1.84078	0		0.00216218	0.0144285	1
KCNK2	0	0	0		2.29974	3.12511	0		0.00501491	0.000749703	1
KCNN4	0	0	0		1.76243	0	0		0.0172812	1	1
KDM4B	0	0	0		0	1.67115	0		1	0.0213229	1
KDM5B	-2.117	0	0		2.35603	0	0		0.00440528	1	1
KDM6B	0.849	0	0		3.08801	1.93273	0		0.000816558	0.0116752	1
KEAP1	-0.625	0	0		3.33311	1.58559	0		0.000464402	0.025966	1
KHDRBS1	0	0	0		0	1.30934	0		1	0.049052	1
KIF11	0	0	0		0	2.14518	0		1	0.00715845	1
KIF1B	0	0	0		0	1.67115	0		1	0.0213229	1
KIR	0	0	0		0	1.8457	0		1	0.014266	1
KISS1	0	0	0		0	0	1.41271		1	1	0.0386629
KIT	0	0	0		2.48105	5.02537	0		0.00330333	9.43252e-06	1
KITLG	1.072	2.396	0		7.47107	3.44799	0		3.3801e-08	0.000356456	1
KLF1	0	0	0		0	1.36726	0		1	0.0429284	1
KLF11	-0.303	0	0		2.03667	1.4023	0		0.00919022	0.0396004	1
KLF17	0	0	0		2.29974	1.37475	0		0.00501491	0.0421938	1
KLF2	-1.852	-1.688	0		7.28538	7.70745	0		5.18343e-08	1.96131e-08	1
KLF3	-1.604	0	0		2.3346	0	1.65989		0.00462809	1	0.0218829
KLF4	0.307	-0.473	0		6.74002	6.27182	0		1.81964e-07	5.34787e-07	1
KLF6	2.639	2.229	0		4.21868	4.88668	0		6.04394e-05	1.29814e-05	1
KLF9	0	0	0		0	0	1.54875		1	1	0.0282654
KLHL21	0	0	0		5.18265	3.81793	0		6.56676e-06	0.000152079	1
KLK5	0	0	0		2.43523	2.19012	0		0.00367092	0.00645469	1
Klra7 (includes others)	0	0	0		0	2.05101	0		1	0.00889179	1
KLRB1	0	0	0		2.03948	2.85814	0		0.00913103	0.00138631	1
Klrk1	0	0	0		2.15902	2.98103	0		0.00693397	0.00104465	1
KMT2A	0	0	0		0	1.60834	0		1	0.0246412	1
KMT2B	0	0	0		0	1.37475	0		1	0.0421938	1
KMT5B	0	0	0		2.15902	0	0		0.00693397	1	1
KNG1	0	0	0		0	1.4023	0		1	0.0396004	1
KRAS	-0.174	0.715	0		10.4074	5.54095	0		3.9134e-11	2.87776e-06	1
KRIT1	0	0	0		1.68861	2.49393	0		0.0204827	0.00320681	1
KRT14	0	0	0		2.26312	2.59723	0		0.00545608	0.00252796	1
KRT17	1.633	2	0		4.68024	4.16432	0		2.08812e-05	6.84977e-05	1
KRT5	0	0	0		0	1.67115	0		1	0.0213229	1
KSR2	0	0	0		1.72656	2.14518	0		0.0187691	0.00715845	1
L1CAM	0	0	0		1.62142	0	0		0.0239101	1	1
LAMA1	0	0	0		1.42961	0	0		0.0371867	1	1
LAMA3	0	0	0		1.42961	1.8457	0		0.0371867	0.014266	1
LAMA5	0	0	0		2.43523	2.19012	0		0.00367092	0.00645469	1
LAMC1	0	0	0		2.59764	0	0		0.00252559	1	1
Laminin (complex)	0.44	0	0		2.86866	1.4023	0		0.00135313	0.0396004	1
LAT2	0	0	0		1.68861	2.49393	0		0.0204827	0.00320681	1
LBH	0	0	0		1.42961	1.8457	0		0.0371867	0.014266	1
LBP	0	0	0		3.61994	6.99111	1.52279		0.000239919	1.02069e-07	0.0300059
LCN2	1.609	1.132	0		3.85307	4.59223	0		0.000140258	2.55722e-05	1
LDHB	0	0	0		0	0	1.90437		1	1	0.0124633
LDL	0.126	0.94	0		14.4311	9.59304	0		3.70632e-15	2.55248e-10	1
LDL-cholesterol	0	0	0		0	1.37475	0		1	0.0421938	1
LDLR	-0.092	0	0		12.4907	8.85745	0		3.23048e-13	1.38851e-09	1
LECT2	0	0	0		1.68861	2.49393	0		0.0204827	0.00320681	1
LEP	0.576	1.687	0		5.51048	4.83016	0		3.08689e-06	1.47857e-05	1
let-7	-2.557	-1.516	0		3.93272	1.8243	0		0.000116756	0.0149867	1
LGALS1	0.191	0	0		2.60366	0	0		0.00249082	1	1
LGALS3	0.555	0	0		3.37454	3.21485	0		0.000422148	0.000609745	1
LGALS8	0	0	0		3.01392	4.24433	0		0.00096845	5.69731e-05	1
LGALS9	0	0	0		0	2.05101	0		1	0.00889179	1
LGR4	0	0	0		2.78083	2.36023	0		0.00165641	0.00436289	1
Lh	2.381	1.698	0		1.56101	1.386	0		0.027478	0.0411149	1
LIF	0.64	1	0		2.96019	2.2609	0		0.001096	0.00548399	1
LILRA2	0	0	0		1.62142	2.42342	0		0.0239101	0.0037721	1
LILRB3	0	0	0		2.47041	3.29915	0		0.00338524	0.000502165	1
LILRB4	0	0	0		1.62142	0	0		0.0239101	1	1
LIMA1	0	0	0		1.68861	0	0		0.0204827	1	1
LINC00963	0	0	0		1.76243	0	0		0.0172812	1	1
LINC01139	0	0	0		0	0	1.7506		1	1	0.0177583
LIPE	0.277	0	0		2.39453	0	0		0.00403152	1	1
LIPG	1.951	0	0		3.01527	1.89697	0		0.00096546	0.0126773	1
lipoxygenase	0	0	0		2.68683	1.54776	0		0.00205668	0.0283296	1
LITAF	0	0	0		2.03948	0	0		0.00913103	1	1
LMNA	0	0	0		2.12607	0	0		0.00748046	1	1
LMNB1	0	0	0		0	0	2.42418		1	1	0.00376548
LOC299282	0	0	0		1.72656	0	0		0.0187691	1	1
LOXL2	0	0	0		2.6885	0	0		0.00204882	1	1
LPA	0	0	0		2.89505	4.12168	0		0.00127335	7.55647e-05	1
LPAR1	0	0	0		1.62142	0	0		0.0239101	1	1
LPAR2	0	0	0		2.15902	1.30934	0		0.00693397	0.049052	1
LPAR3	0	0	0		0	1.54776	0		1	0.0283296	1
LPIN1	0	0	0		0	1.54066	0		1	0.0287963	1
LPL	-0.713	-0.677	0		5.2782	5.72047	0		5.26985e-06	1.9034e-06	1
LRP1	-0.774	0	0		2.9144	3.59981	0		0.00121788	0.000251297	1
LRP6	0	0	0		1.4382	0	0		0.0364584	1	1
LRPAP1	0	0	0		0	1.86279	0		1	0.0137155	1
LRRC26	0	0	0		2.29974	3.12511	0		0.00501491	0.000749703	1
LRRC4	0	0	0		1.72656	0	0		0.0187691	1	1
LRRC8C	0	0	0		0	1.54776	0		1	0.0283296	1
LRRK2	0	0	0		1.50301	2.2984	0		0.0314041	0.00503036	1
LSINCT5	0	0	0		1.42961	1.8457	0		0.0371867	0.014266	1
LTB4R	2.219	0	0		3.52043	2.81425	0		0.000301694	0.00153372	1
LTB4R/LTB4R2	0	0	0		1.72656	2.14518	0		0.0187691	0.00715845	1
LTB4R2	0	0	0		1.76243	0	0		0.0172812	1	1
LTBR	0	0	0		1.93712	1.35037	0		0.0115578	0.0446302	1
LY6E	-1.98	0	0		3.16455	3.29944	1.45334		0.000684621	0.000501838	0.0352092
LY86	0	0	0		0	0	1.84675		1	1	0.0142314
LY96	0	0	0		1.40132	0	0		0.03969	1	1
Lymphotoxin	2.213	1.98	0		4.44213	4.86086	0		3.61305e-05	1.37767e-05	1
LYN	0	0	0		3.53464	4.33229	0		0.000291985	4.65274e-05	1
LYZ	0	0	0		0	1.54776	0		1	0.0283296	1
MAC	0.555	0	0		3.65722	0	1.32565		0.00022018	1	0.0472446
MAD2L2	0	0	0		0	1.30934	0		1	0.049052	1
MAFB	0.437	0.426	0		9.1401	7.94449	0		7.24276e-10	1.13635e-08	1
MAFF	0	0	0		1.76243	4.24433	1.70958		0.0172812	5.69731e-05	0.0195171
MAFG	0	0	0		1.45035	2.24245	1.54875		0.0354525	0.00572208	0.0282654
MAFK	0	0	0		0	2.00958	1.43253		1	0.0097819	0.0369375
MAML1	0	0	0		2.51351	2.24245	0		0.00306545	0.00572208	1
MAP2K1	3.254	2.157	0		6.90966	5.01665	0		1.23123e-07	9.62399e-06	1
MAP2K1/2	3.051	1.929	0		5.50392	2.54213	0		3.1339e-06	0.00286995	1
MAP2K3	1.757	2.172	0		4.26275	3.8034	0		5.46077e-05	0.000157252	1
MAP2K4	0.651	0	0		2.2732	2.03883	0		0.00533093	0.0091448	1
MAP2K5	0.132	0	0		3.08801	1.93273	0		0.000816558	0.0116752	1
MAP2K6	2.23	0	0		4.9044	2.66234	0		1.24625e-05	0.00217601	1
MAP2K7	0	0	0		1.65492	0	0		0.0221351	1	1
MAP3K1	1.741	0	0		3.20742	0	0		0.000620264	1	1
MAP3K14	3.109	2.4	0		7.21115	6.20095	0		6.14966e-08	6.29579e-07	1
Map3k7	2.016	1.504	0		7.34859	8.92576	0		4.48141e-08	1.18642e-09	1
MAP3K7	0.986	1.383	0		9.72755	5.83543	0		1.87261e-10	1.46072e-06	1
MAP3K8	2.227	1.983	0		3.81265	2.30588	0		0.000153941	0.00494446	1
Mapk	1.633	1.664	0		3.63449	5.89224	0		0.00023201	1.28163e-06	1
MAPK1	-2.148	-1.857	0		19.7956	8.1644	0		1.6009e-20	6.8486e-09	1
MAPK10	0	0	0		1.40132	2.19012	0		0.03969	0.00645469	1
MAPK12	0	0	0		2.11033	3.29944	0		0.00775665	0.000501838	1
MAPK13	0	0	0		0	1.93273	0		1	0.0116752	1
MAPK14	1.102	2.057	0		7.6293	4.1388	0		2.348e-08	7.26448e-05	1
MAPK3	1.554	0	0		7.08796	1.60834	0		8.16655e-08	0.0246412	1
MAPK7	1.616	0.853	0		5.03074	3.1575	0		9.31668e-06	0.000695828	1
MAPK8	1.028	0	0		4.47327	2.74215	0		3.36305e-05	0.00181073	1
MAPK9	1.054	0.44	0		1.85994	2.1478	0		0.0138057	0.00711539	1
MAPKAPK2	1.687	2.18	0		5.90147	8.0854	0		1.25466e-06	8.21484e-09	1
MAPKAPK5	0	0	0		2.47041	0	0		0.00338524	1	1
MAPT	0	0	0		0	2.38402	5.05557		1	0.00413033	8.79892e-06
MARCH3	-1.987	-1.987	0		5.74911	7.42539	0		1.78191e-06	3.755e-08	1
MARCO	0	0	0		0	1.30934	0		1	0.049052	1
MARK2	0	0	0		1.49686	2.63068	0		0.0318522	0.00234059	1
MARK3	0	0	0		0	0	2.27083		1	1	0.00536008
MAS1	0	0	0		2.6885	2.35851	0		0.00204882	0.00438016	1
MATK	0	0	0		0	1.67115	0		1	0.0213229	1
MAVS	3.4	2.197	0		12.8585	6.20095	0		1.3853e-13	6.29579e-07	1
MBD2	0	0	0		1.45015	0	2.2056		0.0354694	1	0.00622879
MBNL3	0	0	0		1.42961	1.8457	0		0.0371867	0.014266	1
MBTD1	1	1	0		2.26312	3.81094	0		0.00545608	0.000154547	1
MCAM	0	0	0		1.8442	0	0		0.0143152	1	1
MCOLN2	0	0	0		0	1.45239	0		1	0.0352865	1
MDM2	0	0	0		0	1.77733	0		1	0.016698	1
MDM4	0	0	0		1.35548	3.56613	1.49835		0.0441082	0.00027156	0.0317433
MED1	0	0	0		0	1.55006	0		1	0.0281798	1
MED14	0	0	0		4.43916	0	0		3.63778e-05	1	1
MED21	0	0	0		1.72656	0	0		0.0187691	1	1
MED28	0	0	0		0	1.30934	1.90437		1	0.049052	0.0124633
MED30	0	0	0		1.31248	0	0		0.0486988	1	1
MED6	0	0	0		1.42961	1.8457	0		0.0371867	0.014266	1
MED7	0	0	0		1.72656	0	0		0.0187691	1	1
MEF2C	0	0	0		2.45379	3.41755	0		0.00351729	0.000382337	1
MEF2D	0	0	0		1.49238	0	0		0.0321821	1	1
MEFV	0	0	0		2.29974	3.12511	0		0.00501491	0.000749703	1
MEG3	0	0	0		1.93573	0	0		0.011595	1	1
MEIS1	0	0	0		1.59251	0	0		0.0255557	1	1
Mek	2.378	1.516	0		5.73918	2.86096	0		1.82314e-06	0.00137734	1
MEOX2	-2.414	-1.964	0		4.08879	3.76636	0		8.15094e-05	0.000171254	1
MEP1A	0	0	0		2.68683	3.51895	0		0.00205668	0.000302725	1
MERTK	0	0	0		1.41024	1.47807	0		0.0388826	0.0332603	1
MET	2.815	2.562	0		5.91695	8.12915	0		1.21075e-06	7.42758e-09	1
MGP	0	0	0		0	0	1.39378		1	1	0.0403853
Mi2	0	0	0		1.42961	0	0		0.0371867	1	1
Miat	0	0	0		0	1.67115	0		1	0.0213229	1
MID2	0	0	0		0	1.67115	0		1	0.0213229	1
MIF	2.638	2.56	0		5.36945	5.47362	0		4.27124e-06	3.3603e-06	1
mir-1	-1.999	0	0		2.32351	1.35061	0		0.00474781	0.0446057	1
MIR101	0	0	0		2.59764	0	0		0.00252559	1	1
mir-101	0	0	0		1.45035	0	0		0.0354525	1	1
miR-101b-3p (miRNAs w/seed UACAGUA)	0	0	0		1.42961	0	0		0.0371867	1	1
miR-105-5p (and other miRNAs w/seed CAAAUGC)	0	0	0		1.72656	2.14518	0		0.0187691	0.00715845	1
mir-122	-2.232	0	0		1.49335	0	0		0.0321111	1	1
miR-122-5p (miRNAs w/seed GGAGUGU)	0	0	0		0	1.90847	0		1	0.0123461	1
MIR124	0	0	0		0	1.60913	0		1	0.0245961	1
miR-125b-1-3p (miRNAs w/seed CGGGUUA)	0	0	0		0	1.67115	0		1	0.0213229	1
miR-125b-5p (and other miRNAs w/seed CCCUGAG)	0	-0.689	0		0	2.32939	0		1	0.00468395	1
mir-127	1	0	0		4.11633	2.42342	0		7.65011e-05	0.0037721	1
miR-1285-3p (and other miRNAs w/seed CUGGGCA)	0	0	0		0	1.54776	0		1	0.0283296	1
mir-138	0	0	0		0	1.45239	0		1	0.0352865	1
miR-1-3p (and other miRNAs w/seed GGAAUGU)	-1.703	0	0		1.97386	0	0		0.0106203	1	1
mir-140	0	0	0		0	1.37475	0		1	0.0421938	1
mir-146	-1.591	-1.747	0		5.84922	6.15994	0		1.41507e-06	6.91923e-07	1
miR-146a-5p (and other miRNAs w/seed GAGAACU)	-1.331	-1.432	0		2.70573	3.23584	0		0.00196913	0.000580972	1
mir-15	1.558	1.997	0		9.51841	3.92315	0		3.03106e-10	0.000119358	1
miR-150-5p (and other miRNAs w/seed CUCCCAA)	0	0	0		1.68861	0	0		0.0204827	1	1
mir-155	-0.7	-0.623	0		4.04393	3.64044	0		9.0379e-05	0.000228854	1
miR-155-5p (miRNAs w/seed UAAUGCU)	-3.893	-2.592	0		9.53347	3.73529	0		2.92776e-10	0.000183953	1
miR-16-5p (and other miRNAs w/seed AGCAGCA)	-2.155	0	0		1.80339	0	0		0.0157257	1	1
mir-17	-0.343	0	0		1.78236	0	0		0.0165058	1	1
miR-17-5p (and other miRNAs w/seed AAAGUGC)	-1.539	-1.954	0		2.9345	2.96435	0		0.00116279	0.00108556	1
mir-181	0	0	0		1.90566	0	0		0.0124261	1	1
mir-182	0	0	0		0	1.33389	0		1	0.0463568	1
miR-186-5p (miRNAs w/seed AAAGAAU)	0	0	0		0	1.45239	0		1	0.0352865	1
mir-19	0	0	0		1.55953	1.58559	0		0.0275723	0.025966	1
mir-190	0	0	0		0	1.45239	0		1	0.0352865	1
mir-192	-1.941	0	0		3.33058	2.05101	0		0.000467109	0.00889179	1
mir-194	0	0	0		1.45035	0	0		0.0354525	1	1
miR-199a-3p (and other miRNAs w/seed CAGUAGU)	0	0	0		2.43523	0	0		0.00367092	1	1
miR-199a-5p (and other miRNAs w/seed CCAGUGU)	-1.633	0	0		2.69666	1.85728	0		0.00201068	0.0138905	1
miR-200b-3p (and other miRNAs w/seed AAUACUG)	0	0	0		1.33132	1.4205	0		0.0466321	0.0379752	1
mir-204	0	0	0		2.59764	3.81296	0		0.00252559	0.000153831	1
miR-208a-3p (and other miRNAs w/seed UAAGACG)	0	0	0		0	0	3.76971		1	1	0.000169938
mir-21	1.077	-0.705	0		6.48351	3.74587	0		3.28465e-07	0.000179526	1
miR-21-5p (and other miRNAs w/seed AGCUUAU)	0	0	0		0	2.01918	0		1	0.00956807	1
Mir218	0	0	0		0	0	1.79598		1	1	0.0159964
miR-219a-5p (and other miRNAs w/seed GAUUGUC)	0	0	0		0	0	1.97093		1	1	0.0106922
miR-221-3p (and other miRNAs w/seed GCUACAU)	0	0	0		0	1.73948	0		1	0.0182189	1
mir-223	1.026	0.632	0		11.0873	8.459	0		8.17877e-12	3.47534e-09	1
miR-223-3p (miRNAs w/seed GUCAGUU)	0	0	0		2.59764	0	0		0.00252559	1	1
mir-23	0	0	0		0	0	1.32565		1	1	0.0472446
mir-296	0	0	0		0	1.30934	0		1	0.049052	1
mir-30	-1.948	0	0		2.1831	1.47807	0		0.00655993	0.0332603	1
miR-30c-5p (and other miRNAs w/seed GUAAACA)	-1.633	0	0		1.7186	0	0		0.0191162	1	1
mir-31	0	0	0		2.29347	0	1.47524		0.00508776	1	0.0334778
miR-31-5p (and other miRNAs w/seed GGCAAGA)	-1.998	-1.998	0		3.24526	4.86086	0		0.000568516	1.37767e-05	1
mir-32	0	0	0		0	1.54776	0		1	0.0283296	1
MIR320	0	0	0		1.68861	0	0		0.0204827	1	1
miR-320b (and other miRNAs w/seed AAAGCUG)	0	0	0		0	1.37475	0		1	0.0421938	1
mir-322	0	0	0		1.55982	0	0		0.0275536	1	1
miR-328-3p (and other miRNAs w/seed UGGCCCU)	0	0	0		0	1.54776	0		1	0.0283296	1
mir-331	0	0	0		1.42961	0	0		0.0371867	1	1
miR-331-5p (and other miRNAs w/seed UAGGUAU)	0	0	0		1.72656	0	0		0.0187691	1	1
miR-338-3p (miRNAs w/seed CCAGCAU)	0	0	0		2.15902	1.30934	0		0.00693397	0.049052	1
miR-370-3p (and other miRNAs w/seed CCUGCUG)	0	0	0		0	1.67115	0		1	0.0213229	1
mir-373	0	0	0		1.62142	2.42342	0		0.0239101	0.0037721	1
miR-382-5p (miRNAs w/seed AAGUUGU)	0	0	0		0	1.45239	0		1	0.0352865	1
miR-424-3p (miRNAs w/seed AAAACGU)	0	0	0		0	1.67115	0		1	0.0213229	1
miR-483-3p (miRNAs w/seed CACUCCU)	0	0	0		1.30652	0	0		0.0493717	1	1
miR-483-5p (miRNAs w/seed AGACGGG)	0	0	0		1.42961	1.8457	0		0.0371867	0.014266	1
miR-512-3p (miRNAs w/seed AGUGCUG)	0	0	0		0	2.14518	0		1	0.00715845	1
mir-515	0	0	0		1.40132	2.19012	0		0.03969	0.00645469	1
mir-622	0	0	0		1.42961	0	0		0.0371867	1	1
miR-706 (miRNAs w/seed GAGAAAC)	0	0	0		0	2.14518	0		1	0.00715845	1
mir-8	-0.928	-0.887	0		1.4417	1.84386	0		0.0361658	0.0143266	1
miR-873-5p (and other miRNAs w/seed CAGGAAC)	0	0	0		0	1.45239	0		1	0.0352865	1
mir-96	0	0	0		1.35548	0	0		0.0441082	1	1
MITF	0.204	0.937	0		5.56183	1.55091	0		2.74264e-06	0.0281249	1
MKNK1	1.671	0	0		1.90125	0	0		0.012553	1	1
MKNK2	0	0	0		5.18265	1.67115	0		6.56676e-06	0.0213229	1
MLLT11	0	0	0		1.72656	2.14518	0		0.0187691	0.00715845	1
MLST8	0	0	0		2.98243	1.67115	0		0.00104129	0.0213229	1
MMP1	1.934	0	0		1.75974	0	0		0.0173886	1	1
MMP12	0	0	0		1.49238	0	0		0.0321821	1	1
MMP13	0	0	0		0	1.37475	0		1	0.0421938	1
MMP2	0	0	0		1.49686	1.54066	0		0.0318522	0.0287963	1
MMP3	0	0	0		0	1.39047	0		1	0.0406937	1
MMP8	0	0	0		2.6885	2.35851	0		0.00204882	0.00438016	1
MMP9	0.263	0.728	0		4.67751	2.56145	0		2.1013e-05	0.00274505	1
MOG	1	0	0		3.16595	3.12831	0		0.000682415	0.000744206	1
MRAS	0	0	0		0	1.30934	0		1	0.049052	1
MRGPRX2	0	0	0		1.72656	2.14518	0		0.0187691	0.00715845	1
MRPS18B	0	0	0		0	1.30934	0		1	0.049052	1
MRTFA	0	0	0		0	1.74753	0		1	0.0178844	1
MRTFB	0	0	0		0	1.63454	0		1	0.0231987	1
MSC	2.887	2.646	0		9.26674	6.78044	0		5.4108e-10	1.65789e-07	1
MSI2	0	0	0		1.93573	0	0		0.011595	1	1
MSK1/2	0	0	0		1.42961	0	0		0.0371867	1	1
MSR1	1.067	0	0		4.1424	1.89697	0		7.20451e-05	0.0126773	1
MST1	0	0	0		0	0	1.34166		1	1	0.0455343
MST1R	0	0	0		1.31248	0	0		0.0486988	1	1
MSTN	0	0	0		1.75974	0	0		0.0173886	1	1
MSX2	0	0	0		1.49686	0	0		0.0318522	1	1
Msx3	0	0	0		0	1.37475	0		1	0.0421938	1
Mt1	0	0	0		0	2.85473	1.34166		1	0.00139723	0.0455343
Mt2	0	0	0		0	1.73948	1.37567		1	0.0182189	0.0421046
Mt3	0	0	0		0	1.54776	2.14627		1	0.0283296	0.00714054
MTF1	0	0	0		3.01392	0	0		0.00096845	1	1
MTOR	0.308	2.19	0		2.5309	1.85902	0		0.00294513	0.013835	1
MTORC2	0	0	0		2.89505	2.49393	0		0.00127335	0.00320681	1
MTTP	0	0	0		0	1.36726	0		1	0.0429284	1
MTUS1	0	0	0		0	1.30934	0		1	0.049052	1
MUC1	0.34	0.339	0		11.3651	7.96524	0		4.31381e-12	1.08334e-08	1
MUC16	0	0	0		0	1.8457	0		1	0.014266	1
MUC2	0	0	0		1.72656	2.14518	0		0.0187691	0.00715845	1
MUC2	0	0	0		0	1.54776	0		1	0.0283296	1
MUC4	0	0	0		1.31248	0	0		0.0486988	1	1
Mucin	0	0	0		2.29974	1.37475	0		0.00501491	0.0421938	1
MVP	0	0	0		5.40207	3.90758	0		3.96212e-06	0.000123715	1
MXD1	0	0	0		1.76243	0	0		0.0172812	1	1
MXD4	0	0	0		1.42961	0	0		0.0371867	1	1
MXI1	0	0	0		1.40132	0	0		0.03969	1	1
MYADM	0	0	0		1.72656	2.14518	0		0.0187691	0.00715845	1
MYBPC1	0	0	0		1.42961	0	0		0.0371867	1	1
MYC	0.153	-0.699	0		15.3263	10.4717	0		4.71778e-16	3.37488e-11	1
MYD88	3.704	4.546	0		20.5207	17.5489	0		3.01518e-21	2.82561e-18	1
MYOC	1.067	0	0		2.17874	1.58284	0		0.00662608	0.0261312	1
MYOD1	-0.109	0	0		1.54935	0	0		0.0282259	1	1
MYRF	1	0	0		1.40956	0	0		0.0389438	1	1
NAAA	0	0	0		0	1.67115	0		1	0.0213229	1
NADPH oxidase	0	0	0		1.90686	1.83005	0		0.0123921	0.0147893	1
Naip1 (includes others)	0	0	0		0	1.67115	0		1	0.0213229	1
NAMPT	2.383	1.919	0		4.5167	4.05506	0		3.04299e-05	8.80935e-05	1
NAPRT	0	0	0		1.72656	2.14518	0		0.0187691	0.00715845	1
NBEAL2	-1.131	0	0		3.61994	3.64303	0		0.000239919	0.000227494	1
N-Cadherin	0	0	0		2.03948	0	0		0.00913103	1	1
NCAM1	0	0	0		1.31248	2.09474	0		0.0486988	0.00804015	1
NCF1	0	0	0		1.62669	1.63345	1.31023		0.0236215	0.023257	0.048952
NCF2	0	0	0		0	1.45239	0		1	0.0352865	1
NCF4	0	0	0		1.8442	0	0		0.0143152	1	1
NCOA1	0	0	0		0	3.95766	0		1	0.000110241	1
NCOA2	-0.329	-0.571	0		5.10335	3.8252	0		7.88217e-06	0.000149555	1
N-cor	0.152	0	0		7.26188	6.17551	0		5.47167e-08	6.67557e-07	1
NCOR1	0	0	0		2.73242	0	0		0.00185175	1	1
NCOR2	0	0	0		1.65492	0	0		0.0221351	1	1
NCR1	0	0	0		1.8442	2.65617	0		0.0143152	0.00220712	1
NCR2	0	0	0		2.36208	2.14101	0		0.00434432	0.00722759	1
NCR3	0	0	0		2.03948	2.85814	0		0.00913103	0.00138631	1
NCSTN	0	0	0		1.52766	0	0		0.0296713	1	1
NDFIP1	0	0	0		2.89505	4.12168	0		0.00127335	7.55647e-05	1
NDPK	0	0	0		1.72656	2.14518	0		0.0187691	0.00715845	1
NDRG1	1.752	1.999	0		4.43927	4.00312	0		3.63693e-05	9.92847e-05	1
Nedd4	0	0	0		1.42961	1.8457	0		0.0371867	0.014266	1
NEDD4	0	0	0		2.43523	0	0		0.00367092	1	1
NEDD9	0	0	0		1.41024	0	0		0.0388826	1	1
NEK7	0	0	0		1.93573	0	0		0.011595	1	1
NEUROG1	-1.633	-2	0		2.86331	2.91354	0		0.00136989	0.00122028	1
NFAT (complex)	0.581	0	0		6.55206	3.13207	1.37567		2.80506e-07	0.000737784	0.0421046
Nfat (family)	1.035	1.463	0		6.36326	7.32703	1.8508		4.33255e-07	4.70941e-08	0.0140994
NFAT5	1.941	2	0		4.17536	2.72656	0		6.67798e-05	0.00187688	1
NFATC1	0	0	0		1.8628	1.4111	1.82671		0.0137153	0.0388061	0.0149036
NFATC2	1.452	2.111	0		10.4961	13.0601	1.30314		3.19109e-11	8.70705e-14	0.049758
NFATC4	0	0	0		1.62669	0	0		0.0236215	1	1
NFIC	0	0	0		0	0	1.35832		1	1	0.0438209
NFIX	0	0	0		0	1.97021	0		1	0.0107099	1
NFkB (complex)	5.73	5.559	0		25.1114	24.5779	0		7.73745e-26	2.64297e-25	1
NFkB (family)	0	0	0		2.6885	2.35851	0		0.00204882	0.00438016	1
NFKB1	2.246	2.181	0		12.2505	11.7749	0		5.61654e-13	1.67911e-12	1
NfkB1-RelA	1.99	1.99	0		2.87985	4.4754	0		0.00131871	3.34656e-05	1
NFKB2	1.98	0	0		3.18301	2.6211	0		0.000656136	0.00239276	1
NFKBIA	2.15	1.522	0		10.6401	7.63738	0		2.29037e-11	2.30473e-08	1
NFKBIB	0.895	1.941	0		6.17424	6.94665	0		6.69508e-07	1.13072e-07	1
NFKBIE	0	0	0		3.14615	4.38034	0		0.000714249	4.16541e-05	1
NfkB-RelA	2.44	2.44	0		5.48798	7.95064	0		3.25104e-06	1.12037e-08	1
NFYA	0	0	0		0	1.5955	0		1	0.0253803	1
NGF	1.973	0	0		2.57365	0	0		0.00266901	1	1
NHLH2	0	0	0		1.50301	0	0		0.0314041	1	1
NIK	0	0	0		0	1.67115	0		1	0.0213229	1
NKRF	0	0	0		0	1.67115	0		1	0.0213229	1
NKX2-1	0	0	0		0	0	1.37231		1	1	0.0424315
NKX2-3	-1.604	-1.89	0		4.15789	2.99521	0		6.95203e-05	0.00101109	1
NLRC3	0	0	0		0	1.67115	0		1	0.0213229	1
NLRC4	0	0	0		1.55982	0	0		0.0275536	1	1
NLRC5	0	0	0		0	2.00958	0		1	0.0097819	1
NLRP1	0	0	0		1.42961	1.8457	0		0.0371867	0.014266	1
NLRP11	0	0	0		0	1.67115	0		1	0.0213229	1
NLRP12	0	-1.253	0		1.52766	5.25406	0		0.0296713	5.57103e-06	1
NLRP2	0	0	0		1.72656	2.14518	0		0.0187691	0.00715845	1
NLRP3	0.156	1.341	0		6.00631	5.41516	0		9.85575e-07	3.84454e-06	1
NLRX1	0	0	0		1.76243	0	0		0.0172812	1	1
NME3	0	0	0		2.47041	1.45239	0		0.00338524	0.0352865	1
NMNAT3	0	0	0		1.72656	2.14518	0		0.0187691	0.00715845	1
Nmnat3	0	0	0		1.42961	1.8457	0		0.0371867	0.014266	1
NOD1	0	0	0		3.42104	2.09474	0		0.000379279	0.00804015	1
NOD2	3.548	3.121	0		12.2529	12.6711	0		5.58566e-13	2.13264e-13	1
NOS1	0	0	0		1.30652	1.4023	0		0.0493717	0.0396004	1
NOS2	1.48	2.611	0		4.95546	6.4479	0		1.108e-05	3.56535e-07	1
NOS3	0	0	0		0	1.94407	0		1	0.0113743	1
NOSTRIN	0	0	0		1.66214	0	0		0.02177	1	1
Notch	0.136	0	0		1.80422	0	0		0.0156955	1	1
NOTCH1	0.323	0.849	0		2.40836	2.56062	0		0.00390516	0.00275032	1
NOTCH3	0.152	0	0		1.63017	0	0		0.0234332	1	1
NOX1	0	0	0		2.05563	1.93273	0		0.00879766	0.0116752	1
NOX4	0.555	0	0		2.34836	2.66513	0		0.00448374	0.00216208	1
NOXO1	0	0	0		0	1.67115	0		1	0.0213229	1
NPC1	1.165	0	0		1.52752	1.91272	0		0.0296812	0.0122259	1
NPLOC4	0	0	0		0	1.54776	0		1	0.0283296	1
NPM1	-0.083	-0.492	0		3.21847	3.85683	0		0.000604689	0.000139051	1
NQO1	0	0	0		0	2.30808	0		1	0.00491953	1
NR1D1	0	0	0		1.4382	0	0		0.0364584	1	1
NR1D2	0	0	0		1.93573	0	0		0.011595	1	1
Nr1h	-3.225	-3.092	0		5.68088	7.65072	0		2.08508e-06	2.23504e-08	1
NR1H2	-1.664	-1.067	0		2.50472	3.07464	0		0.00312813	0.000842092	1
NR1H3	-0.596	0.223	0		7.94137	9.00545	0		1.14455e-08	9.87523e-10	1
NR1I2	0.776	0	0		1.41331	0	0		0.0386087	1	1
NR3C1	-1.774	-3.075	0		14.3188	6.94863	0		4.79975e-15	1.12556e-07	1
NR3C2	0.388	1.091	0		4.20023	2.84148	0		6.30629e-05	0.00144052	1
NR4A1	-0.715	0.728	0		1.45696	1.32289	1.92481		0.0349173	0.0475451	0.0118903
NR4A2	-1.172	0.283	0		2.32561	3.48504	0		0.00472487	0.000327313	1
NR4A3	0	0	0		1.47105	0	0		0.0338024	1	1
NR5A2	0	0	0		0	1.47599	0		1	0.0334203	1
NRAS	0	0	0		3.97632	3.22757	0		0.000105603	0.000592149	1
NRF1	0.254	0	0		3.29314	2.16506	0		0.000509172	0.00683823	1
NRG1	2.122	1.963	0		2.82976	2.18816	0		0.00147992	0.00648397	1
NRP1	0	0	0		1.50301	0	0		0.0314041	1	1
NRXN1	0	0	0		1.66214	0	0		0.02177	1	1
NT5E	0	0	0		2.22891	0	1.47524		0.00590317	1	0.0334778
NTF4	0	0	0		0	0	1.54875		1	1	0.0282654
NTRK1	0	0	0		0	1.73948	0		1	0.0182189	1
NUBP1	0	0	0		1.42961	1.8457	0		0.0371867	0.014266	1
NUPR1	0.853	1.414	0		4.01171	1.52858	0		9.73395e-05	0.0296087	1
NXF1	0	0	0		0	1.54776	0		1	0.0283296	1
OGA	-0.426	0.832	0		4.66298	4.88229	2.17527		2.17282e-05	1.31132e-05	0.00667931
OGG1	2	0	0		3.72998	2.24245	0		0.000186218	0.00572208	1
OLFM4	0	0	0		1.93573	2.75104	0		0.011595	0.00177403	1
OLR1	-0.391	0	0		2.58009	0	0		0.00262975	1	1
OPRM1	0	0	0		1.40132	0	0		0.03969	1	1
ORM1	0	0	0		0	1.45239	0		1	0.0352865	1
Orm1 (includes others)	0	0	0		0	1.37475	0		1	0.0421938	1
ORMDL3	2.219	0	0		4.23714	1.93273	0		5.79245e-05	0.0116752	1
OSCAR	1.732	2.646	0		12.2079	8.41197	0		6.19596e-13	3.87283e-09	1
OSM	1.934	1.502	0		12.758	9.53325	0		1.74574e-13	2.92918e-10	1
OSMR	0	0	0		1.51416	0	0		0.0306085	1	1
OSTM1	0	0	0		1.68861	0	0		0.0204827	1	1
OTUD7B	0	0	0		2.29974	3.12511	0		0.00501491	0.000749703	1
P2RX4	0	0	0		2.47041	1.45239	0		0.00338524	0.0352865	1
P2RX7	0	0	0		2.87985	1.83005	0		0.00131871	0.0147893	1
P2RY12	0	0	0		0	1.54776	0		1	0.0283296	1
P2RY2	0	0	0		1.31248	2.09474	0		0.0486988	0.00804015	1
P2RY4	0	0	0		3.46498	0	0		0.000342786	1	1
P2RY6	0	0	0		0	1.45239	0		1	0.0352865	1
P38 MAPK	1.848	2.479	0		15.5991	10.4642	0		2.51706e-16	3.43368e-11	1
PADI2	0	0	0		1.50301	2.2984	0		0.0314041	0.00503036	1
PAEP	0	0	0		1.35548	3.56613	0		0.0441082	0.00027156	1
PAF1	3.988	2.828	0		15.4665	8.69013	0		3.41623e-16	2.04115e-09	1
PAK6	0	0	0		1.42961	0	0		0.0371867	1	1
Par	0	0	0		1.42961	0	0		0.0371867	1	1
PARK7	1.154	1.154	0		3.33058	4.9502	0		0.000467109	1.1215e-05	1
PARP1	0	0	0		0	1.94868	0		1	0.0112543	1
PARP2	0	0	0		1.76243	0	0		0.0172812	1	1
PARP9	2.433	2	0		6.03093	5.04468	0		9.31264e-07	9.02226e-06	1
PAX3	0	0	0		2.3603	0	0		0.00436219	1	1
PAX4	0	0	0		1.55982	0	0		0.0275536	1	1
PAX5	0	0	0		1.30652	0	0		0.0493717	1	1
PBX2	0	0	0		2.03948	0	0		0.00913103	1	1
PCAT6	0	0	0		1.72656	0	0		0.0187691	1	1
PCGEM1	0	0	0		0	1.43918	0		1	0.0363765	1
PCYT2	0	0	0		1.31248	0	0		0.0486988	1	1
PDCD1	1.633	0	0		2.97115	0	0		0.00106869	1	1
PDCD4	0	0	0		1.31248	0	0		0.0486988	1	1
PDE3A	0	0	0		2.15902	0	0		0.00693397	1	1
Pde4	0.272	0	0		4.1424	3.18531	1.47524		7.20451e-05	0.000652667	0.0334778
PDE4B	0	0	0		1.8442	0	0		0.0143152	1	1
PDE6B	0	0	0		2.03948	0	0		0.00913103	1	1
Pdgf (complex)	0.057	0	0		1.80697	1.38034	0		0.0155964	0.0416546	1
PDGF BB	2.899	2.835	0		8.1161	6.76611	0		7.65427e-09	1.71353e-07	1
PDGFB	0.677	2.2	0		5.41794	3.95433	0		3.82e-06	0.000111088	1
Pdgfr	1	0	0		4.11633	2.42342	0		7.65011e-05	0.0037721	1
Pdgfra-Pdgfrb	0	0	0		1.42961	0	0		0.0371867	1	1
PDK1	0	0	0		1.93573	0	0		0.011595	1	1
PDLIM1	0	0	0		0	1.54776	0		1	0.0283296	1
PDLIM2	1.667	2.236	0		4.16024	3.23584	0		6.91446e-05	0.000580972	1
PDLIM7	0	0	0		0	0	1.84675		1	1	0.0142314
PDPK1	0	0	0		1.62669	2.77514	0		0.0236215	0.00167828	1
PDPN	0	0	0		1.72656	2.14518	0		0.0187691	0.00715845	1
PDX1	2.309	2.449	0		4.15691	3.33364	1.35124		6.96772e-05	0.000463833	0.0445406
PEA15	0	0	0		1.8442	0	0		0.0143152	1	1
PECAM1	0	0	0		2.59764	2.2984	0		0.00252559	0.00503036	1
PELI1	0	0	0		1.68861	4.12168	0		0.0204827	7.55647e-05	1
PELI2	0	0	0		0	1.54776	0		1	0.0283296	1
PELI3	0	0	0		1.72656	2.14518	0		0.0187691	0.00715845	1
PELP1	0	0	0		3.80169	4.08455	0		0.000157873	8.23091e-05	1
PEMT	0	0	0		2.36208	0	0		0.00434432	1	1
PER3	0	0	0		0	1.54776	0		1	0.0283296	1
PF4	2.006	2.393	0		6.76741	6.85432	0		1.7084e-07	1.39857e-07	1
PFN1	0	0	0		0	1.30934	0		1	0.049052	1
PGF	2.562	1.999	0		5.30573	3.85683	0		4.94618e-06	0.000139051	1
PGK1	0	0	0		0	1.30934	0		1	0.049052	1
PGR	2.706	1.95	0		9.86229	4.44877	0		1.37313e-10	3.55821e-05	1
PHB	0	0	0		0	2.05101	0		1	0.00889179	1
PI3	0	0	0		1.93573	2.75104	0		0.011595	0.00177403	1
PI3K (complex)	2.551	2.942	0		11.9633	7.31156	0		1.08815e-12	4.88018e-08	1
PI3K (family)	2.304	1.67	0		6.72349	8.09119	0		1.89021e-07	8.10598e-09	1
PIAS1	0	0	0		0	1.54066	0		1	0.0287963	1
PIAS3	0	0	0		1.55982	0	0		0.0275536	1	1
PIAS4	0	0	0		1.55982	2.35851	0		0.0275536	0.00438016	1
PIK3CA	0	0	0		0	1.82454	0		1	0.0149783	1
PIK3CD	0	0	0		1.55953	2.70064	0		0.0275723	0.0019923	1
PIK3CG	0.261	0	0		1.90566	1.33389	0		0.0124261	0.0463568	1
Pik3r	0	0	0		0	1.45239	0		1	0.0352865	1
PIK3R1	2.533	2.391	0		6.20774	4.44405	0		6.19813e-07	3.59712e-05	1
PIK3R2	0	0	0		1.50301	0	0		0.0314041	1	1
PILRB	0	0	0		0	1.45239	0		1	0.0352865	1
PIN1	0.776	0	0		2.63411	0	0		0.00232213	1	1
PIP5K1A	0	0	0		0	1.45239	0		1	0.0352865	1
Pka	-1.016	0	0		1.60356	0	0		0.0249136	1	1
Pka catalytic subunit	0	0	0		0	1.79865	0		1	0.0158982	1
Pkc(s)	0.058	0.243	0		5.81741	2.89369	0		1.52262e-06	0.00127735	1
Pkg	0	0	0		0	1.89697	0		1	0.0126773	1
PKP2	0	0	0		2.03948	0	0		0.00913103	1	1
PLA2G1B	0	0	0		2.89505	0	0		0.00127335	1	1
PLA2G2A	0	0	0		2.78717	2.42342	0		0.0016324	0.0037721	1
PLA2G2D	0	0	0		3.24526	2.00958	0		0.000568516	0.0097819	1
PLA2G4A	0	0	0		1.69894	2.85473	0		0.0200013	0.00139723	1
PLA2R1	0	0	0		1.66214	2.81425	1.31023		0.02177	0.00153372	0.048952
PLAT	0.921	0	0		2.34836	1.56278	0		0.00448374	0.0273662	1
PLAU	1.511	2.207	0		7.01372	4.88668	0		9.6891e-08	1.29814e-05	1
PLAUR	0	0	0		2.14488	1.45836	0		0.00716342	0.0348047	1
PLC	0	0	0		0	1.97021	0		1	0.0107099	1
PLCE1	1	0	0		3.72998	2.24245	0		0.000186218	0.00572208	1
PLCG1	0	0	0		1.35548	2.14101	0		0.0441082	0.00722759	1
PLCG2	0	0	0		2.11033	1.97021	0		0.00775665	0.0107099	1
PLEKHA1	0	0	0		1.72656	0	0		0.0187691	1	1
PLEKHA2	0	0	0		1.72656	0	0		0.0187691	1	1
PLEKHM1	0	0	0		1.42961	1.8457	0		0.0371867	0.014266	1
PLG	1.503	0	0		2.35143	1.67522	0		0.00445213	0.021124	1
PLIN5	0	0	0		1.73719	0	0		0.0183151	1	1
PLK1	0	0	0		1.55953	2.70064	0		0.0275723	0.0019923	1
PLK2	0.447	0	0		3.96615	4.4754	0		0.000108105	3.34656e-05	1
PLK4	0	0	0		2.81663	4.40819	0		0.00152534	3.90672e-05	1
PLP1	0	0	0		1.4382	0	0		0.0364584	1	1
PLP2	0	0	0		0	0	1.84675		1	1	0.0142314
PML	2.21	1.023	0		14.4141	11.0049	0		3.8536e-15	9.88715e-12	1
PMM2	0	0	0		1.72656	2.14518	0		0.0187691	0.00715845	1
PNPLA2	-1.109	0	0		2.5064	0	0		0.00311603	1	1
PODXL	0	0	0		2.68683	1.54776	0		0.00205668	0.0283296	1
POLDIP3	0	0	0		1.42961	0	0		0.0371867	1	1
POLR2A	0	0	0		3.08561	0	0		0.000821091	1	1
POMC	0.689	0.916	0		1.65179	2.01107	0		0.0222954	0.00974827	1
PON1	0	0	0		2.29347	0	0		0.00508776	1	1
POPDC2	0	0	0		1.42961	1.8457	0		0.0371867	0.014266	1
POR	0.6	0	0		1.57289	0	0		0.0267371	1	1
POSTN	0	0	0		2.58873	0	0		0.00257794	1	1
POU2AF1	1.45	1.809	0		4.85864	6.67495	0		1.38471e-05	2.11375e-07	1
POU2F1	0	0	0		3.32673	3.6209	0		0.000471272	0.000239386	1
POU2F2	0	1.067	0		0	2.37951	1.93697		1	0.00417343	0.011562
POU5F1	1.543	0	0		1.59016	0	0		0.0256944	1	1
PPARA	-0.165	-0.03	0		3.97829	3.77612	0		0.000105126	0.000167447	1
PPARD	-0.222	-0.317	0		3.93024	2.87181	0		0.000117424	0.00134335	1
PPARG	-1.251	-1.313	0		8.08304	6.87174	0		8.25955e-09	1.34355e-07	1
PPARGC1A	-1.102	0	0		1.4103	0	0		0.0388779	1	1
PPID	0	0	0		0	1.30934	0		1	0.049052	1
PPIF	0.816	2	0		2.04436	2.31309	0		0.00902903	0.00486303	1
PPM1B	0	0	0		0	1.30934	0		1	0.049052	1
PPP1CA	0	0	0		0	0	1.84675		1	1	0.0142314
PPP1R1B	0	0	0		0	2.14101	0		1	0.00722759	1
PPP1R3A	0	0	0		1.42961	1.8457	0		0.0371867	0.014266	1
PPP2CA	0.896	0	0		3.57524	0	0		0.000265927	1	1
PPP2R5C	-2	0	0		3.61994	2.19012	0		0.000239919	0.00645469	1
PPP3CA	0	0	0		1.67832	2.50427	2.05468		0.0209738	0.00313133	0.00881701
PPP5C	0	0	0		3.14615	0	0		0.000714249	1	1
PPRC1	2.402	0	0		3.73267	2.38725	0		0.000185067	0.00409967	1
PRB1/PRB2	0	0	0		1.72656	2.14518	0		0.0187691	0.00715845	1
PRDM1	-1.691	0.447	0		8.45078	2.17048	0		3.54177e-09	0.00675339	1
PRDX2	0	0	0		1.35548	2.14101	0		0.0441082	0.00722759	1
PRDX4	0	0	0		0	1.67115	0		1	0.0213229	1
PRF1	0	0	0		2.36208	3.56613	0		0.00434432	0.00027156	1
PRG3	0	0	0		1.42961	1.8457	0		0.0371867	0.014266	1
PRKAA1	-0.791	0.113	0		5.91324	4.82633	0		1.22112e-06	1.49166e-05	1
PRKAA2	-1.716	-1.387	0		2.71058	2.75984	0		0.00194723	0.00173842	1
PRKAG3	0	0	0		3.48193	0	0		0.000329664	1	1
PRKCA	2.726	2.37	0		6.16532	3.54457	0		6.83401e-07	0.000285387	1
PRKCB	-0.692	0	0		3.84674	0	0		0.000142318	1	1
PRKCD	3.622	3.07	0		7.45509	5.80575	0		3.50681e-08	1.56406e-06	1
PRKCZ	0	0	0		1.62669	1.63345	0		0.0236215	0.023257	1
PRKD1	1.744	1.981	0		3.52536	3.37956	0		0.000298289	0.000417294	1
PRKD2	0	0	0		0	1.37475	0		1	0.0421938	1
PRL	3.62	3.85	0		20.2668	8.47456	0		5.40948e-21	3.35305e-09	1
PRMT1	0	0	0		3.21847	1.54066	0		0.000604689	0.0287963	1
PRNP	1	0	0		2.37766	2.56145	0		0.00419117	0.00274505	1
PROC	-1.09	-1.421	0		7.59031	7.18494	0		2.56855e-08	6.53214e-08	1
Pro-inflammatory Cytokine	0	0	0		5.2019	1.85728	0		6.28199e-06	0.0138905	1
PROK1	0	0	0		0	1.30934	0		1	0.049052	1
PROK2	0	0	0		0	1.37475	0		1	0.0421938	1
PROS1	0	0	0		0	1.67115	0		1	0.0213229	1
PRR13	0	0	0		1.72656	2.14518	0		0.0187691	0.00715845	1
PRSS8	0	0	0		3.89995	1.37475	0		0.000125908	0.0421938	1
PRTN3	0	0	0		2.03948	2.85814	0		0.00913103	0.00138631	1
PSEN1	2.005	0	0		3.13705	5.11511	4.18485		0.000729373	7.67158e-06	6.53352e-05
PSMA1	0	0	0		0	2.14518	2.74719		1	0.00715845	0.00178981
PSMB1	0	0	0		0	1.45239	0		1	0.0352865	1
PSMB10	0	0	0		2.6885	0	0		0.00204882	1	1
PSMB5	0	0	0		0	1.45239	2.04974		1	0.0352865	0.0089179
PSMB8	0	0	0		2.89505	0	0		0.00127335	1	1
PSMB9	0	0	0		1.93573	0	0		0.011595	1	1
PSMC5	0	0	0		0	1.67115	0		1	0.0213229	1
PSMD10	0	0	0		2.00364	3.18531	0		0.00991655	0.000652667	1
PSMD4	0	0	0		0	0	1.97093		1	1	0.0106922
PSMD9	0	0	0		1.72656	0	0		0.0187691	1	1
PTAFR	0.936	0.443	0		5.36995	6.17183	0		4.2663e-06	6.73241e-07	1
P-TEFb	0	0	0		0	1.54776	0		1	0.0283296	1
PTEN	1.465	0.301	0		3.77956	2.98138	0		0.000166128	0.0010438	1
PTGER1	1	0	0		3.97668	2.35851	0		0.000105517	0.00438016	1
PTGER2	1.334	0.911	0		3.03061	2.1319	0		0.000931935	0.00738069	1
PTGER4	-1.612	-1.245	0		16.8753	11.2315	0		1.33258e-17	5.86782e-12	1
PTGR2	0	0	0		1.72656	2.14518	0		0.0187691	0.00715845	1
PTGS1	0	0	0		1.90566	1.33389	0		0.0124261	0.0463568	1
PTGS2	1.517	2.677	0		9.29439	6.90837	0		5.07701e-10	1.23488e-07	1
PTH	-0.6	0	0		1.73589	0	0		0.0183699	1	1
PTHLH	-1.067	0	0		1.84908	0	0		0.0141555	1	1
PTK2	0	0	0		2.24265	0	0		0.00571936	1	1
PTMA	0	0	0		4.84433	4.53295	0		1.4311e-05	2.93121e-05	1
PTPN22	0	0	0		1.90686	1.83005	0		0.0123921	0.0147893	1
PTPN23	0	0	0		0	1.67115	0		1	0.0213229	1
PTPN6	-0.895	-2.2	0		6.31985	5.72047	0		4.78799e-07	1.9034e-06	1
PTPRC	1.067	0	0		2.03667	3.56083	0		0.00919022	0.000274895	1
PTPRJ	1.414	1.342	0		5.09058	4.33659	0		8.11754e-06	4.60693e-05	1
PTX3	-1.486	-1.746	0		7.23049	7.19911	0		5.88174e-08	6.32257e-08	1
PYCARD	0	0	0		2.00364	1.89697	0		0.00991655	0.0126773	1
QKI	0	0	0		2.36208	2.14101	0		0.00434432	0.00722759	1
QRFP	0	0	0		2.15902	1.30934	0		0.00693397	0.049052	1
RAB27A	0	0	0		0	1.37475	0		1	0.0421938	1
RAB7A	0	0	0		0	1.30934	0		1	0.049052	1
RAC1	1.25	2.132	0		4.88374	2.80834	0		1.30695e-05	0.00155476	1
RAC2	0	0	0		2.00259	6.10036	0		0.00994057	7.93668e-07	1
RACGAP1	0	0	0		0	0	2.27083		1	1	0.00536008
Raf	0	0	0		2.69666	0	0		0.00201068	1	1
RAF1	3.539	3.112	0		7.43555	5.37411	0		3.6682e-08	4.22558e-06	1
RAG1	0	0	0		3.08801	0	0		0.000816558	1	1
RALA	0	0	0		1.50301	0	0		0.0314041	1	1
RAMP3	0	0	0		0	1.54776	0		1	0.0283296	1
RANBP2	0	0	0		1.72656	0	0		0.0187691	1	1
RAP1A	0	0	0		0	1.37475	0		1	0.0421938	1
RAP1B	0	0	0		3.66301	2.98103	0		0.000217268	0.00104465	1
RAPGEF3	0.555	0	0		3.80519	1.76849	1.41271		0.000156606	0.0170415	0.0386629
RAPGEF4	0	0	0		4.5867	1.54776	2.14627		2.58998e-05	0.0283296	0.00714054
RARA	-1.807	-2	0		4.2284	1.81063	1.57907		5.91014e-05	0.0154659	0.026359
RARB	0.186	0	0		3.00712	2.55101	1.62624		0.000983731	0.00281181	0.0236463
RARRES3	0	0	0		1.55953	1.58559	0		0.0275723	0.025966	1
RAS	0.492	0	0		2.31829	2.48263	0		0.00480515	0.00329131	1
RASSF5	0	0	0		1.81844	0	1.31023		0.0151901	1	0.048952
RASSF6	0	0	0		0	1.45239	0		1	0.0352865	1
RBCK1	0	0	0		2.15902	1.30934	0		0.00693397	0.049052	1
RBM17	0	0	0		1.42961	0	0		0.0371867	1	1
RBM3	0	0	0		1.42961	1.8457	0		0.0371867	0.014266	1
RBM5	0	0	0		2.00259	1.38456	0		0.00994057	0.0412516	1
RBP1	0	0	0		1.55982	0	0		0.0275536	1	1
RC3H1	0	0	0		4.95056	1.76849	1.31023		1.12058e-05	0.0170415	0.048952
RCAN1	0	0	0		1.90686	1.83005	0		0.0123921	0.0147893	1
RCE1	0	0	0		0	1.45836	2.61098		1	0.0348047	0.00244918
RDH8	0	0	0		1.8442	2.65617	0		0.0143152	0.00220712	1
REL	2.363	2.575	0		8.28575	5.05587	0		5.17901e-09	8.79295e-06	1
RELA	4.887	3.764	0		13.0059	12.1626	0		9.86404e-14	6.87736e-13	1
Relaxin	0	0	0		1.90686	0	0		0.0123921	1	1
RELB	0	0.784	0		1.84908	3.66391	0		0.0141555	0.000216815	1
Ren2	0	0	0		0	0	1.54875		1	1	0.0282654
RET	2.585	0	0		3.43429	0	0		0.000367886	1	1
RETN	0	0	0		1.73261	2.16506	0		0.0185091	0.00683823	1
RETNLB	-0.333	1.633	0		4.81151	4.68614	0		1.54343e-05	2.05995e-05	1
RETSAT	0	0	0		0	1.67115	0		1	0.0213229	1
RF00100.1-201	0	0	0		0	1.30934	0		1	0.049052	1
RGCC	0	0	0		1.35548	0	0		0.0441082	1	1
RGS10	0	0	0		2.43605	3.18727	0		0.00366398	0.000649718	1
RHO	0.447	0	0		2.18341	0	0		0.00655529	1	1
RHOA	0.456	0	0		2.15553	1.57035	0		0.00698995	0.0268939	1
RHOJ	0	0	0		0	0	1.47524		1	1	0.0334778
Rig1	0	0	0		0	1.67115	0		1	0.0213229	1
RIPK1	1.286	1.522	0		3.72971	7.29345	0		0.000186335	5.08808e-08	1
RIPK2	2.364	2.217	0		5.15022	3.8034	0		7.07592e-06	0.000157252	1
RIPK3	0	0	0		1.68861	0	0		0.0204827	1	1
RLIM	0	0	0		1.8442	0	0		0.0143152	1	1
RLN2	0	0	0		1.50301	0	0		0.0314041	1	1
RNA polymerase II	0	0	0		5.31477	3.78117	0		4.84426e-06	0.000165511	1
RNASE1	2.138	2.433	0		8.62497	8.21507	0		2.37156e-09	6.09432e-09	1
RNASE2	1.611	2.397	0		8.9654	6.62433	0		1.08293e-09	2.37503e-07	1
RNASEH2A	0	0	0		15.3948	7.80915	0		4.02927e-16	1.55186e-08	1
RNASEH2B	0	0	0		4.62897	2.65617	0		2.34979e-05	0.00220712	1
RNASEL	-0.072	0	0		2.69806	2.94014	0		0.0020042	0.00114778	1
RNF216	0	0	0		1.76243	0	0		0.0172812	1	1
Rock	1.432	1.432	0		4.08623	4.29847	0		8.19925e-05	5.02953e-05	1
ROCK1	0	0	0		0	1.71154	0		1	0.0194296	1
ROCK2	1.432	1.98	0		3.11096	3.76636	0		0.000774542	0.000171254	1
RORA	-0.069	1.286	0		2.88631	3.2536	0		0.00129924	0.000557704	1
RPL19	0	0	0		1.42961	1.8457	0		0.0371867	0.014266	1
RPN2	0	0	0		0	2.14518	2.74719		1	0.00715845	0.00178981
RPP38	0	0	0		0	1.67115	0		1	0.0213229	1
Rps15a-ps4	0	0	0		1.42961	1.8457	0		0.0371867	0.014266	1
RPS3	0	0	0		2.47041	3.29915	0		0.00338524	0.000502165	1
RPS6KA	0	0	0		1.72656	2.14518	0		0.0187691	0.00715845	1
RPS6KA5	0	0	0		2.16798	0	0		0.00679228	1	1
Rps6ka5	0	0	0		0	1.54776	0		1	0.0283296	1
RPSA	-1	0	0		2.53713	0	0		0.00290312	1	1
RPTOR	1.715	0	0		1.8819	0	0		0.0131251	1	1
RRM2	0	0	0		2.29974	1.37475	0		0.00501491	0.0421938	1
RSF1	0	0	0		0	1.45239	0		1	0.0352865	1
Rsk	0	0	0		0	1.54776	0		1	0.0283296	1
RTKN	0	0	0		2.29974	0	0		0.00501491	1	1
RUBCN	0	0	0		2.47041	3.29915	0		0.00338524	0.000502165	1
RUNX1	0.089	0	0		4.29921	0	1.37231		5.02096e-05	1	0.0424315
RUNX2	-0.876	0	0		2.06408	0	0		0.00862823	1	1
RUNX3	-0.726	-1.387	0		3.86706	3.52592	0		0.000135813	0.000297905	1
Rxr	0	0	0		1.66818	1.30322	0		0.0214694	0.0497489	1
RXRA	-1.132	0	0		3.68383	2.20791	0		0.000207095	0.00619567	1
RXRB	0	0	0		4.21868	1.82454	0		6.04394e-05	0.0149783	1
RXRG	0	0	0		0	1.58559	0		1	0.025966	1
Ryr	0	0	0		0	1.67115	0		1	0.0213229	1
S100A4	0.084	0	0		5.92925	1.4205	0		1.17694e-06	0.0379752	1
S100A6	-1	0	0		2.69806	1.73948	0		0.0020042	0.0182189	1
S100A7	1.982	0	0		4.43916	2.57107	0		3.63778e-05	0.00268493	1
S100a7a	0	0	0		3.46498	2.85814	0		0.000342786	0.00138631	1
S100A8	2.266	1.969	0		5.77611	4.3201	0		1.67453e-06	4.78519e-05	1
S100A9	1.692	1.72	0		3.39425	2.8305	0		0.000403409	0.00147742	1
S1PR3	0	0	0		2.36208	3.56613	0		0.00434432	0.00027156	1
SAA	1.448	1.739	0		4.02508	7.88784	0		9.43876e-05	1.29466e-08	1
SAA1	1.584	1.628	0		4.29218	6.6986	0		5.10291e-05	2.00169e-07	1
SAFB	0	0	0		1.68023	0	0		0.020882	1	1
SAMHD1	0	0	0		3.29497	0	0		0.000507023	1	1
SAMSN1	3.051	2.53	0		7.81721	8.98011	0		1.52332e-08	1.04687e-09	1
SASH1	2.887	2.333	0		8.11199	8.69537	0		7.72691e-09	2.01664e-09	1
SATB1	0.83	1.308	0		2.89783	2.88297	0		0.00126524	0.00130927	1
SATB2	0	0	0		0	0	1.54875		1	1	0.0282654
SAV1	0	0	0		0	0	1.84675		1	1	0.0142314
SBDS	0	0	0		0	0	1.96479		1	1	0.0108446
SCAP	0	0	0		1.58229	0	0		0.0261646	1	1
SCARB1	0.832	0	0		2.21273	2.99043	0		0.00612731	0.00102228	1
SCAVENGER receptor CLASS A	0	0	0		1.55982	0	0		0.0275536	1	1
SCD	-0.179	0	0		2.32561	1.66147	0		0.00472487	0.0218037	1
SCIN	0	0	0		0	0	2.14627		1	1	0.00714054
SCUBE3	0	0	0		1.93573	0	0		0.011595	1	1
SCX	0	0	0		0	0	1.43253		1	1	0.0369375
SELE	0	0	0		1.76243	2.57107	0		0.0172812	0.00268493	1
SELP	2.207	1.242	0		10.4518	8.22637	0		3.53324e-11	5.9378e-09	1
SELPLG	3.162	2.449	0		8.48686	6.34812	0		3.25938e-09	4.48619e-07	1
SEMA7A	0	0	0		2.05563	0	0		0.00879766	1	1
SENP5	0	0	0		1.42961	1.8457	0		0.0371867	0.014266	1
SENP6	0	0	0		2.47041	3.29915	0		0.00338524	0.000502165	1
SENP7	0	0	0		2.03948	2.85814	0		0.00913103	0.00138631	1
SERCA	0	0	0		0	1.30934	0		1	0.049052	1
SERPINA1	-1.481	-0.305	0		3.62638	4.67217	0		0.000236388	2.1273e-05	1
SERPINB2	0	0	0		0	0	1.79598		1	1	0.0159964
SERPINB7	0	0	0		2.68683	3.51895	0		0.00205668	0.000302725	1
SERPIND1	0	0	0		0	1.37475	0		1	0.0421938	1
SERPINE1	0	0	0		1.4382	0	0		0.0364584	1	1
SERPINE2	0	0	0		3.16387	1.51919	0		0.000685691	0.0302556	1
SERPINF1	-0.6	-1.091	0		3.12536	4.22445	0		0.000749278	5.96412e-05	1
Setd1b	0	0	0		1.42961	0	0		0.0371867	1	1
SF1	0	0	0		2.29974	1.37475	0		0.00501491	0.0421938	1
Sfk	0	0	0		2.03948	2.85814	0		0.00913103	0.00138631	1
SFN	0	0	0		0	1.76849	0		1	0.0170415	1
SFRP1	0.351	0	0		3.29314	0	0		0.000509172	1	1
SFRP4	0	0	0		1.68861	0	0		0.0204827	1	1
SFRP5	0	0	0		2.15902	2.98103	0		0.00693397	0.00104465	1
SFTPA1	-3.14	-2.421	0		5.36048	4.4729	0		4.36038e-06	3.36591e-05	1
SFTPD	0	0	0		1.77698	1.73948	1.41271		0.0167115	0.0182189	0.0386629
SGPL1	0.492	0	0		2.9144	1.4205	0		0.00121788	0.0379752	1
SH3BP2	0	0	0		1.35548	0	0		0.0441082	1	1
SH3GLB1	0	0	0		1.42961	1.8457	0		0.0371867	0.014266	1
SH3KBP1	0	0	0		1.62142	0	0		0.0239101	1	1
SHARPIN	0	0	0		2.59764	0	0		0.00252559	1	1
SHC1	0.022	0.685	0		3.08561	5.3934	0		0.000821091	4.04204e-06	1
SIGIRR	0	0	0		2.11033	1.97021	0		0.00775665	0.0107099	1
SIGLEC11	0	0	0		1.42961	1.8457	0		0.0371867	0.014266	1
Sik1	0	0	0		1.76243	0	0		0.0172812	1	1
SIM1	0	0	0		1.30455	0	0		0.0495964	1	1
SIRPA	0	0	0		2.6885	3.90758	0		0.00204882	0.000123715	1
SIRT1	-3.217	-2.17	0		7.7733	6.97637	0		1.68538e-08	1.05591e-07	1
SIRT3	-0.243	-0.243	0		1.65492	3.12831	0		0.0221351	0.000744206	1
SIRT6	0	0	0		0	1.55802	0		1	0.0276684	1
SIVA1	0	0	0		0	1.67115	0		1	0.0213229	1
SIX1	0	0	0		0	0	1.31023		1	1	0.048952
SIX4	0	0	0		0	1.54776	2.14627		1	0.0283296	0.00714054
SLC12A6	0	0	0		0	1.67115	0		1	0.0213229	1
SLC13A1	-1.89	0	0		2.65343	0	1.92791		0.0022211	1	0.0118057
SLC15A4	0	0	0		1.72656	0	0		0.0187691	1	1
SLC16A3	0	0	0		1.8442	0	0		0.0143152	1	1
SLC20A2	0	0	0		0	0	2.14627		1	1	0.00714054
SLC3A2	0	0	0		0	1.54776	0		1	0.0283296	1
SLC4A1	0	0	0		1.45035	0	0		0.0354525	1	1
SLC52A1	0	0	0		1.72656	2.14518	0		0.0187691	0.00715845	1
SLC7A11	0	0	0		0	1.54776	0		1	0.0283296	1
SLC9A9	0	0	0		0	1.67115	0		1	0.0213229	1
SLPI	0.692	0	0		4.0522	1.86279	0		8.86751e-05	0.0137155	1
SMAD1	0	0	0		0	1.4023	0		1	0.0396004	1
SMAD1/5	0	0	0		2.03948	0	0		0.00913103	1	1
SMAD2	0.762	0	0		1.639	0	0		0.0229614	1	1
SMAD3	1.317	1.91	0		5.11407	3.2743	0		7.69009e-06	0.000531747	1
SMAD4	0.857	0.795	0		8.06206	5.78794	0		8.66848e-09	1.62951e-06	1
SMAD6	0	0	0		0	0	1.52279		1	1	0.0300059
SMAD7	-0.746	-2.065	0		3.23362	2.32991	0		0.00058396	0.00467837	1
SMARCB1	1.549	0.954	0		5.31138	4.46035	0		4.88221e-06	3.46461e-05	1
SMARCD3	0	0	0		0	2.00958	0		1	0.0097819	1
SMC3	0	0	0		1.50301	0	0		0.0314041	1	1
SMURF2	0	0	0		1.45035	0	0		0.0354525	1	1
SNAI1	0	0	0		2.08267	1.93658	0		0.0082666	0.0115724	1
SNAI2	0.485	0	0		3.00853	0	0		0.000980547	1	1
SNCA	1.501	1.934	0		3.22152	1.0361	0		0.000600459	0.0920241	1
SND1	0	0	0		0	1.73948	0		1	0.0182189	1
SNHG15	0	0	0		0	1.37475	0		1	0.0421938	1
SOCS1	-3.094	-2.515	0		13.758	13.1036	0		1.74599e-14	7.87687e-14	1
SOCS3	-2.571	-1.712	0		2.81477	4.33229	0		0.00153191	4.65274e-05	1
Sod	0	-1	0		2.11033	4.77613	0		0.00775665	1.67444e-05	1
SOD1	-1.342	0	0		5.38135	3.11285	1.98343		4.15578e-06	0.000771178	0.0103888
SOD2	0	0	0		2.95237	2.09033	0		0.0011159	0.00812221	1
Sos	0	0	0		5.15843	1.81585	0		6.94331e-06	0.0152808	1
SOST	0	0	0		2.15902	0	1.97093		0.00693397	1	0.0106922
SOX1	-2	0	0		1.3147	0	0		0.0484506	1	1
Sox2ot	0	0	0		3.29497	2.75104	0		0.000507023	0.00177403	1
SOX2-OT	0	0	0		3.29497	2.75104	0		0.000507023	0.00177403	1
SOX4	-0.392	0.524	0		2.55303	3.40269	0		0.00279879	0.000395646	1
SP1	2.176	1.864	0		11.4094	9.05978	1.73571		3.8956e-12	8.71408e-10	0.0183776
SP100	0	0	0		0	0	1.45334		1	1	0.0352092
SP110	-2.111	-2.236	0		4.54755	2.65203	0		2.8343e-05	0.00222829	1
SP3	2.394	0	0		6.781	4.55799	0		1.65576e-07	2.76698e-05	1
SP4	0	0	0		1.77698	0	0		0.0167115	1	1
SP7	0	0	0		0	0	1.60598		1	1	0.0247752
SPATA2	0	0	0		0	1.67115	0		1	0.0213229	1
SPDEF	-1.213	0	0		3.54881	2.84053	0		0.000282614	0.00144367	1
SPHK1	-1.091	0	0		1.78751	0	0		0.0163114	1	1
SPI1	1.107	2.99	0		20.7477	15.3693	0		1.78762e-21	4.27315e-16	1
SPIB	-1.067	0	0		1.67832	0	0		0.0209738	1	1
SPP1	1.241	2.002	0		8.82137	6.63845	0		1.5088e-09	2.29908e-07	1
SPRED2	0	0	0		0	1.54776	0		1	0.0283296	1
SPRY2	0	0	0		1.46706	0	0		0.0341148	1	1
SPTLC2	0	0	0		1.73719	0	0		0.0183151	1	1
SQSTM1	0.943	0.2	0		4.52851	4.6269	0		2.96133e-05	2.361e-05	1
SRA1	0	0	0		3.16455	1.97021	0		0.000684621	0.0107099	1
SRC	0.678	1.934	0		5.712	2.01107	0		1.94087e-06	0.00974827	1
SRC (family)	0.492	0	0		3.33745	0	0		0.000459782	1	1
SREBF1	-0.651	-0.818	0		4.982	3.92731	1.98808		1.04232e-05	0.00011822	0.0102782
SREBF2	-1.342	-1.949	0		2.32561	3.48504	0		0.00472487	0.000327313	1
Srebp	0	0	0		2.36208	3.56613	0		0.00434432	0.00027156	1
SRF	0	0	0		0	1.40765	0		1	0.0391158	1
SRPK3	0	0	0		1.72656	0	0		0.0187691	1	1
SRRM1	0	0	0		1.72656	2.14518	0		0.0187691	0.00715845	1
SRSF1	0	0	0		1.69894	0	0		0.0200013	1	1
SRSF3	0	0	0		1.55982	2.35851	0		0.0275536	0.00438016	1
SSH2	0	0	0		1.42961	0	0		0.0371867	1	1
SSTR2	0	0	0		1.69894	1.68459	0		0.0200013	0.0206732	1
ST14	0	0	0		2.59764	3.81296	0		0.00252559	0.000153831	1
ST6GALNAC1	0	0	0		0	1.30934	0		1	0.049052	1
ST8SIA1	0	0	0		1.86168	0	0		0.0137504	1	1
STAB1	0	0	0		0	1.67115	0		1	0.0213229	1
STAR	0	0	0		2.05563	0	1.67217		0.00879766	1	0.0212729
STAT1	2.073	2.739	0		20.4896	13.7553	0		3.23922e-21	1.75675e-14	1
Stat1-Stat2	0	0	0		3.14615	0	0		0.000714249	1	1
STAT2	2.75	2.166	0		8.99248	6.62368	0		1.01747e-09	2.37861e-07	1
STAT3	0.483	1.109	0		20.5324	16.5552	0		2.93515e-21	2.78482e-17	1
STAT3/5	0	0	0		1.42961	0	0		0.0371867	1	1
Stat3-Stat3	0	0	0		0	1.65858	0		1	0.0219492	1
STAT4	2.401	1.584	0		2.39356	2.21505	0		0.00404055	0.00609461	1
STAT5A	-0.625	-0.254	0		2.41943	5.0446	0		0.00380691	9.02393e-06	1
STAT5a/b	0	0	0		1.98134	0	0		0.010439	1	1
STAT5B	0	0	0		0	1.75724	0		1	0.0174886	1
STAT6	0.282	-0.41	0		14.5657	12.2094	1.50743		2.71842e-15	6.17497e-13	0.0310862
STK11	0.207	0	0		2.02083	0	1.86517		0.00953159	1	0.0136406
STK17A	-1.987	0	0		4.84433	2.75104	0		1.4311e-05	0.00177403	1
STK17B	0	0	0		0	1.45239	0		1	0.0352865	1
STK3	0	0	0		0	0	1.54875		1	1	0.0282654
STK40	-1.994	-1.994	0		7.866	10.3694	0		1.36146e-08	4.27188e-11	1
STOX1	0	0	0		0	0	1.60598		1	1	0.0247752
STX11	0	0	0		0	1.45239	0		1	0.0352865	1
SUCNR1	0	0	0		0	1.67115	0		1	0.0213229	1
SUMO1P3	0	0	0		0	1.54776	0		1	0.0283296	1
SUMO2	0	0	0		1.35684	0	0		0.0439702	1	1
SUMO3	0	0	0		1.46706	0	0		0.0341148	1	1
SUV39H1	0	0	0		1.31248	0	0		0.0486988	1	1
SYK	0.54	1.709	0		3.60185	4.38745	0		0.000250118	4.09775e-05	1
SYVN1	2.515	2.236	0		6.53835	2.5233	0		2.89499e-07	0.00299709	1
TAB1	-1.803	-1.205	0		8.87315	4.34366	0		1.33923e-09	4.53249e-05	1
TAB2	0	0	0		2.29974	1.37475	0		0.00501491	0.0421938	1
TAC1	2.585	2.395	0		3.31346	4.14956	0		0.000485892	7.08662e-05	1
TAC4	0	0	0		1.55982	0	0		0.0275536	1	1
TAF4	-0.927	0	0		2.04436	1.51026	0		0.00902903	0.0308847	1
TAF4B	0	0	0		3.96615	1.83005	1.34166		0.000108105	0.0147893	0.0455343
TAF9	0	0	0		0	1.45239	0		1	0.0352865	1
TAGLN	0	0	0		1.42961	0	0		0.0371867	1	1
TAL1	-1	0	0		2.92695	2.91581	0		0.00118319	0.00121391	1
TANK	0.577	0	0		3.21847	3.85683	0		0.000604689	0.000139051	1
TAOK2	0	0	0		0	3.51895	2.14627		1	0.000302725	0.00714054
TAP1	-2.421	-2.207	0		6.73731	7.30007	0		1.83101e-07	5.01107e-08	1
TARDBP	0	0	0		1.59251	1.60913	0		0.0255557	0.0245961	1
TAS1R3	0	0	0		0	2.57107	0		1	0.00268493	1
TAT	0	0	0		3.45411	0	0		0.000351475	1	1
TAZ	0.686	0	0		3.54673	2.8753	0		0.000283967	0.0013326	1
TBK1	2.905	2.971	0		18.359	16.8897	0		4.37572e-19	1.28914e-17	1
TBP	0	0	0		2.07175	0	0		0.00847716	1	1
TBX21	0	0	0		1.37053	3.83262	0		0.0426059	0.000147021	1
TBX5	0.447	1	0		3.81556	5.68777	0		0.000152911	2.05225e-06	1
TBXT	0	0	0		1.31248	2.09474	0		0.0486988	0.00804015	1
TCF	0	0	0		2.78693	2.37951	0		0.00163332	0.00417343	1
TCF12	0	0	0		1.60596	0	0		0.0247766	1	1
TCF20	0	0	0		0	1.54776	0		1	0.0283296	1
TCF3	0	0	0		2.73498	0	0		0.00184084	1	1
TCF4	0	0	0		5.05563	1.78262	0		8.79769e-06	0.0164959	1
Tcf7	0	0	0		1.62669	1.63345	0		0.0236215	0.023257	1
TCF7	-1.131	0	0		2.00259	0	0		0.00994057	1	1
TCF7L2	0	0.87	0		0	1.97377	0		1	0.0106227	1
TCIM	1.98	0	0		5.38764	4.90858	0		4.096e-06	1.2343e-05	1
TCIRG1	0	0	0		1.68861	0	0		0.0204827	1	1
TCL1A	0	0	0		6.97607	1.58284	1.9554		1.05664e-07	0.0261312	0.0110815
TCR	2.607	1.261	0		14.5657	13.1867	1.53662		2.71842e-15	6.50543e-14	0.0290654
TEAD	0	0	0		2.15902	1.30934	0		0.00693397	0.049052	1
TENM1	0	0	0		0	0	1.79598		1	1	0.0159964
TERF2IP	0	0	0		2.00364	3.18531	0		0.00991655	0.000652667	1
TERT	1.96	0	0		10.5798	7.07258	0		2.63165e-11	8.46088e-08	1
TET2	0.447	1	0		5.29751	6.46711	0		5.04072e-06	3.41103e-07	1
TF	0	0	0		3.42104	2.09474	0		0.000379279	0.00804015	1
TFAM	0	0	0		0	2.00958	0		1	0.0097819	1
TFAP2A	-2.369	0	0		3.85175	2.18953	0		0.000140687	0.00646351	1
TFAP2B	0	0	0		1.45035	0	0		0.0354525	1	1
TFAP2C	-1.106	-1.919	0		7.83166	3.69097	0		1.47348e-08	0.000203718	1
TFAP2D	0	0	0		1.72656	0	0		0.0187691	1	1
TFAP4	0	0	0		1.4382	1.49834	0		0.0364584	0.0317438	1
TFCP2	0	0	0		1.55982	0	1.60598		0.0275536	1	0.0247752
TFEB	-0.391	0	0		3.05963	1.47807	0		0.000871706	0.0332603	1
TFRC	0	0	0		3.74222	2.50427	0		0.000181044	0.00313133	1
Tgf beta	-0.711	-0.837	0		7.69841	5.21601	0		2.00258e-08	6.0812e-06	1
TGFA	1.197	0.706	0		4.54946	5.61692	0		2.82191e-05	2.41591e-06	1
TGFB1	2.673	1.806	0		23.8172	12.9875	0		1.52346e-24	1.02916e-13	1
TGFB2	1.31	0	0		4.39959	0	0		3.98483e-05	1	1
TGFBR1	1.342	0	0		1.65851	0	0		0.021953	1	1
TGFBR2	-0.659	1.067	0		3.26128	1.78262	1.31485		0.000547927	0.0164959	0.0484335
TGIF1	0	0	0		2.43523	3.64303	0		0.00367092	0.000227494	1
TGM2	3.117	3.47	0		22.031	14.3249	0		9.31007e-23	4.73292e-15	1
TH1 Cytokine	0	0	0		0	1.45239	0		1	0.0352865	1
TH17 Cytokine	0	0	0		0	1.67115	0		1	0.0213229	1
THBS1	-0.747	0	0		3.11096	1.49834	0		0.000774542	0.0317438	1
THRB	0	0	0		0	1.65767	0		1	0.0219953	1
THSD4	0	0	0		1.72656	0	0		0.0187691	1	1
thymidine phosphorylase	0	0	0		1.72656	2.14518	0		0.0187691	0.00715845	1
TIAM2	0	0	0		1.42961	1.8457	0		0.0371867	0.014266	1
TICAM1	4.166	4.09	0		18.7351	19.5682	0		1.84018e-19	2.70249e-20	1
TICAM2	-1.131	0	0		2.81663	1.79865	0		0.00152534	0.0158982	1
TIFA	1.206	0.9	0		5.58721	5.76419	0		2.58695e-06	1.7211e-06	1
TIGAR	0	0	0		2.98243	1.67115	0		0.00104129	0.0213229	1
Til1	0	0	0		1.42961	0	2.44654		0.0371867	1	0.0035765
TIMP1	2	0	0		2.34836	0	0		0.00448374	1	1
TIMP3	-1	0	0		3.42918	0	0		0.000372233	1	1
TIRAP	-0.223	0.147	0		3.58753	4.16432	0		0.000258506	6.84977e-05	1
TLE1	0	0	0		2.78717	0	0		0.0016324	1	1
TLE6	0	0	0		1.42961	0	2.44654		0.0371867	1	0.0035765
Tlr	2.817	2.935	0		10.096	6.74045	0		8.01745e-11	1.81783e-07	1
TLR1	0	0	0		2.22891	2.05101	0		0.00590317	0.00889179	1
TLR10	0	0	0		2.29974	3.12511	0		0.00501491	0.000749703	1
Tlr11	0	0	0		2.15902	2.98103	0		0.00693397	0.00104465	1
Tlr12	0	0	0		2.47041	3.29915	0		0.00338524	0.000502165	1
Tlr13	0	0	0		2.03948	2.85814	0		0.00913103	0.00138631	1
TLR2	2.291	2.829	0		7.2885	9.242	0		5.14641e-08	5.72792e-10	1
TLR2/3/4/9	0.747	0	0		4.43916	2.57107	1.70958		3.63778e-05	0.00268493	0.0195171
TLR3	3.994	3.641	0		24.2215	19.202	0		6.005e-25	6.28019e-20	1
TLR4	4.434	4.481	0		23.6271	20.5178	1.51609		2.3602e-24	3.03537e-21	0.0304723
TLR5	1.988	1.954	0		6.1833	3.72302	0		6.55696e-07	0.000189227	1
TLR6	0	0	0		0	1.93273	0		1	0.0116752	1
TLR7	4.074	4.026	0		17.0216	15.0587	0		9.51519e-18	8.73531e-16	1
TLR7/8	2.53	1.89	0		9.7676	9.34299	0		1.70767e-10	4.53955e-10	1
TLR8	1.209	1.949	0		2.82416	3.52282	0		0.00149913	0.000300042	1
TLR9	3.913	4.17	0		15.8924	13.0205	0		1.28115e-16	9.53793e-14	1
TMEM173	2.804	2	0		7.77181	5.93006	0		1.69118e-08	1.17475e-06	1
TMEM184A	0	0	0		1.72656	0	0		0.0187691	1	1
TMEM9B	0	0	0		1.42961	1.8457	0		0.0371867	0.014266	1
TMSB4	0	0	0		1.31248	0	1.47524		0.0486988	1	0.0334778
TNC	0.64	0	0		8.16367	3.56083	0		6.86013e-09	0.000274895	1
Tnf (family)	3.585	2.759	0		9.96055	10.0215	0		1.0951e-10	9.51595e-11	1
Tnf receptor	-1.103	0	0		3.08801	0	0		0.000816558	1	1
TNFAIP3	-1.941	-0.728	0		5.62158	4.67217	0		2.39014e-06	2.1273e-05	1
TNFAIP6	0	0	0		1.93573	0	0		0.011595	1	1
TNFAIP8	0	0	0		0	1.45239	0		1	0.0352865	1
TNFRSF10A	0	0	0		0	0	1.97093		1	1	0.0106922
TNFRSF10B	0	0	0		0	2.85814	0		1	0.00138631	1
TNFRSF11B	0	0	0		1.40132	0	1.60598		0.03969	1	0.0247752
TNFRSF12A	0	0	0		1.45035	2.24245	0		0.0354525	0.00572208	1
TNFRSF13C	0	0	0		2.36208	0	0		0.00434432	1	1
TNFRSF17	0	0	0		1.93573	0	0		0.011595	1	1
TNFRSF18	-1.342	-1	0		4.44213	4.86086	0		3.61305e-05	1.37767e-05	1
TNFRSF1A	1.994	2.522	0		7.65939	7.40497	0		2.19083e-08	3.93581e-08	1
TNFRSF1B	1.471	1	0		2.48105	3.05551	0		0.00330333	0.000880006	1
TNFRSF25	0	0	0		1.45035	2.24245	0		0.0354525	0.00572208	1
TNFRSF6B	0	0	0		1.40132	2.19012	0		0.03969	0.00645469	1
TNFRSF8	0.968	0	0		3.00853	2.01918	0		0.000980547	0.00956807	1
TNFRSF9	-0.277	0	0		3.05963	1.47807	0		0.000871706	0.0332603	1
TNFSF10	1.931	1.964	0		6.13363	7.14368	0		7.35142e-07	7.18322e-08	1
TNFSF11	3.325	3.854	0		21.7797	13.1739	1.93361		1.66069e-22	6.70114e-14	0.0116516
TNFSF12	1.88	2.833	0		7.92091	7.14368	0		1.19976e-08	7.18322e-08	1
TNFSF13B	2.398	2.19	0		8.6514	5.18507	0		2.23153e-09	6.5303e-06	1
TNFSF14	1.781	0	0		4.68024	2.85473	0		2.08812e-05	0.00139723	1
TNFSF15	0	0	0		1.77698	0	0		0.0167115	1	1
TNFSF9	0	0	0		1.50301	2.2984	1.5764		0.0314041	0.00503036	0.0265218
TNIP1	0	0	0		1.55953	0	0		0.0275723	1	1
TNIP2	0	0	0		0	2.14518	0		1	0.00715845	1
TNIP3	0	0	0		0	1.54776	0		1	0.0283296	1
TNK1	1.982	0	0		3.61994	0	0		0.000239919	1	1
TNNI3	0	0	0		3.01392	4.24433	0		0.00096845	5.69731e-05	1
TNPO2	0	0	0		1.72656	2.14518	0		0.0187691	0.00715845	1
TNR	0	0	0		1.72656	0	0		0.0187691	1	1
TP53COR1	0	0	0		0	3.42549	0		1	0.000375416	1
TP63	2.574	2.375	0		2.91407	6.05024	0		0.00121879	8.90759e-07	1
TP73	1.049	0.321	0		3.56929	2.04298	1.46804		0.000269596	0.00905773	0.0340376
TP73-AS1	0	0	0		0	1.30934	0		1	0.049052	1
TPSAB1/TPSB2	0	0	0		1.76243	0	0		0.0172812	1	1
TPSD1	0	0	0		0	1.30934	0		1	0.049052	1
TRADD	2.828	2.236	0		7.49108	5.81785	0		3.22791e-08	1.52109e-06	1
TRAF2	1.608	1.037	0		3.77861	6.83778	0		0.000166489	1.45284e-07	1
TRAF3	0.251	-0.239	0		5.95765	5.38299	0		1.10242e-06	4.14007e-06	1
TRAF3IP2	0.298	0	0		3.39495	1.82454	0		0.000402759	0.0149783	1
TRAF5	0	0	0		1.50301	0	0		0.0314041	1	1
TRAF6	1.973	2.145	0		7.21115	7.47465	0		6.14966e-08	3.35239e-08	1
TRAF7	0	0	0		0	1.67115	0		1	0.0213229	1
TRAK2	0	0	0		0	2.14518	0		1	0.00715845	1
TRB	0	0	0		0	1.63345	0		1	0.023257	1
TREM1	-0.404	0.516	0		18.963	15.4912	1.31093		1.08903e-19	3.22676e-16	0.0488735
TREM2	-0.52	0	0		6.18882	3.56613	0		6.47416e-07	0.00027156	1
TREX1	0.161	0	0		5.23272	3.81296	0		5.85163e-06	0.000153831	1
TRG	0	0	0		1.93573	2.75104	0		0.011595	0.00177403	1
TRIL	0	0	0		0	1.54776	0		1	0.0283296	1
TRIM13	0	0	0		1.42961	1.8457	0		0.0371867	0.014266	1
TRIM24	-3.5	-2.63	0		10.242	5.11022	0		5.72844e-11	7.75861e-06	1
TRIM29	0	0	0		0	1.45239	0		1	0.0352865	1
TRIM32	0	0	0		0	1.67115	0		1	0.0213229	1
TRIM36	0	0	0		0	1.67115	0		1	0.0213229	1
TRIM38	0	0	0		2.78717	4.01003	0		0.0016324	9.77178e-05	1
TRIM5	0	0	0		1.42961	1.8457	0		0.0371867	0.014266	1
TRIM50	0	0	0		1.42961	1.8457	0		0.0371867	0.014266	1
TRIM58	0	0	0		0	1.67115	0		1	0.0213229	1
TRIM66	0	0	0		0	1.67115	0		1	0.0213229	1
TRIM67	0	0	0		1.42961	1.8457	0		0.0371867	0.014266	1
TRIM8	0	0	0		0	1.30934	0		1	0.049052	1
TRIM9	0	0	0		0	1.67115	0		1	0.0213229	1
TRPC6	0	0	0		0	1.67115	0		1	0.0213229	1
TRPM2	0	0	0		0	1.65858	0		1	0.0219492	1
TRPV4	0.927	0	0		2.87985	3.0811	0		0.00131871	0.000829651	1
trypsin	0	0	0		1.45035	2.24245	0		0.0354525	0.00572208	1
tryptase	0	0	0		1.93573	0	0		0.011595	1	1
TSC1	-0.068	0	0		2.03667	0	0		0.00919022	1	1
TSC2	1.313	-1.102	0		3.8105	3.48914	1.67645		0.000154703	0.000324231	0.0210644
TSC22D1	0	0	0		3.66301	2.98103	0		0.000217268	0.00104465	1
TSC22D3	-2.128	-1.866	0		6.17424	6.94665	0		6.69508e-07	1.13072e-07	1
TSH	0.555	1.982	0		1.94359	2.74864	0		0.0113871	0.00178387	1
TSLP	0	0	0		3.16387	2.59723	0		0.000685691	0.00252796	1
TSPO	0	0	0		1.93573	2.75104	0		0.011595	0.00177403	1
TWIST1	-0.283	0.73	0		3.71414	3.02106	0		0.000193136	0.000952674	1
TWIST2	0.101	0	0		4.29218	2.66513	0		5.10291e-05	0.00216208	1
TXN	1.84	1.387	0		6.71518	5.98548	0		1.92674e-07	1.03399e-06	1
TXNDC5	0	0	0		1.42961	0	0		0.0371867	1	1
TYK2	0	0	0		1.52766	1.56278	0		0.0296713	0.0273662	1
TYMP	0	0	0		1.42961	1.8457	0		0.0371867	0.014266	1
TYRO3	0	0	0		1.8442	0	0		0.0143152	1	1
TYROBP	0.955	2.4	0		8.9047	6.57334	2.28612		1.24537e-09	2.67089e-07	0.00517466
tyrosine kinase	0	0	0		0	1.54776	0		1	0.0283296	1
U1 snRNP	0	0	0		3.46498	4.70675	0		0.000342786	1.96448e-05	1
UBA7	0	0	0		3.29497	0	0		0.000507023	1	1
UBD	0	0	0		1.45035	0	0		0.0354525	1	1
UBE2L6	0	0	0		1.72656	0	0		0.0187691	1	1
UCHL1	-1.134	0	0		3.80169	0	0		0.000157873	1	1
UCN	0	0	0		0	1.68459	0		1	0.0206732	1
UCN2	0	0	0		1.50301	2.2984	0		0.0314041	0.00503036	1
UCP1	1.467	0	0		3.43539	2.52231	0		0.000366955	0.00300396	1
[truncated: 75 more rows]

## Sheet: selected UPstream CD6
Upstream Regulators	challenged CD vs unchallenged CD	challenged CD vs challenged HC	unchallenged CD vs challenged HC
TNF	6.614	5.185	-0.11
NFkB (complex)	5.73	5.559	0
IL1B	5.597	4.998	-0.419
IFNA2	5.337	3.858	0
IRF7	5.08	3.651	0
IFNG	5.076	6.104	0
RELA	4.887	3.764	0
IFNL1	4.609	3.537	0
TLR4	4.434	4.481	0
IL1A	4.433	4.129	0
TICAM1	4.166	4.09	0
IRF5	4.153	2.934	0
APP	4.087	3.602	0
TLR7	4.074	4.026	0
TLR3	3.994	3.641	0
PAF1	3.988	2.828	0
IL1	3.969	3.723	0
F2	3.938	3.517	0
TLR9	3.913	4.17	0
Interferon alpha	3.736	3.624	0
CCL5	3.715	3.325	0

## Sheet: Selected Upstream Reg CD0
Upstream Regulators	challenged CD vs unchallenged CD	challenged CD vs challenged HC	unchallenged CD vs challenged HC
NFE2L2	0.998	2.473	1.978
SMARCA4	1.868	3.028	1.964
TP53	0.939	0.618	1.961
JUN	1.676	2.47	1.931
CSF2	2.761	3.283	0.956
FOS	0.843	0.864	0.914
